# Supplementary material
Source: publisher site journal article supplement (https://www.spandidos-publications.com/2281/downloadSupplementary)
Supplement: Supplementary file 1 [file downloadSupplementary]

## Sheet: Document description
Table SVII. miRNA-gene network from primary Sjögren syndrome activation group.
Table name	Column head	Meaning of column head
miRNA-gene relationship	miRNA	miRNA name
	Style	miRNA type, upregulated miRNA is indicated by up, downregulated miRNA is indicated by down
	Genesymbol	Gene name, consistent with NCBI GenBank's gene marker
	Description	Gene annotation mainly refered to gene annotation in NCBI GenBank
miRNA-gene characteristic	Genesymbol	The name of target gene is consistent with the gene identification of NCBI GenBank
	Description	Target gene annotation mainly refered to gene annotation in NCBI GenBank
	Degree	degree means the number of microRNA that regulates a target gene in the network
	miRNA	miRNA name
	Style	miRNA type, upregulated miRNA is indicated by up, downregulated miRNA is indicated by down
	Degree	degree means the number of target gene that regulates a miRNA in the network
miRNA, microRNA. Upper table shows miRNA-gene association; lower table shows miRNA-gene characteristic.

## Sheet: miRNA-gene relationship
microRNA	Style	Gene symbol	Description
hsa-miR-98-5p	up	AASS	aminoadipate-semialdehyde synthase
hsa-miR-3609	down	ABAT	4-aminobutyrate aminotransferase
hsa-miR-5096	up	ABCA4	ATP-binding cassette, sub-family A (ABC1), member 4
hsa-miR-98-5p	up	ABCB9	ATP-binding cassette, sub-family B (MDR/TAP), member 9
hsa-miR-98-5p	up	ABCC10	ATP-binding cassette, sub-family C (CFTR/MRP), member 10
hsa-miR-98-5p	up	ABCC5	ATP-binding cassette, sub-family C (CFTR/MRP), member 5
hsa-miR-5787	up	ABCG4	ATP-binding cassette, sub-family G (WHITE), member 4
hsa-miR-4505	up	ABCG4	ATP-binding cassette, sub-family G (WHITE), member 4
hsa-miR-1273g-3p	up	ABCG8	ATP-binding cassette, sub-family G (WHITE), member 8
hsa-miR-15a-5p	down	ABI2	abl-interactor 2
hsa-miR-15a-5p	down	ABL2	v-abl Abelson murine leukemia viral oncogene homolog 2
hsa-miR-98-5p	up	ABL2	v-abl Abelson murine leukemia viral oncogene homolog 2
hsa-miR-148a-3p	down	ABL2	v-abl Abelson murine leukemia viral oncogene homolog 2
hsa-miR-181c-5p	down	ABL2	v-abl Abelson murine leukemia viral oncogene homolog 2
hsa-miR-30c-1-3p	up	ABL2	v-abl Abelson murine leukemia viral oncogene homolog 2
hsa-miR-5787	up	ABLIM3	actin binding LIM protein family, member 3
hsa-miR-15a-5p	down	ACACA	acetyl-CoA carboxylase alpha
hsa-miR-5096	up	ACAP2	ArfGAP with coiled-coil, ankyrin repeat and PH domains 2
hsa-miR-98-5p	up	ACER2	alkaline ceramidase 2
hsa-miR-5787	up	ACP2	acid phosphatase 2, lysosomal
hsa-miR-181a-5p	down	ACSL1	acyl-CoA synthetase long-chain family member 1
hsa-miR-181c-5p	down	ACSL1	acyl-CoA synthetase long-chain family member 1
hsa-miR-15a-5p	down	ACSL4	acyl-CoA synthetase long-chain family member 4
hsa-miR-98-5p	up	ACSL6	acyl-CoA synthetase long-chain family member 6
hsa-miR-30d-5p	down	ACVR1	activin A receptor, type I
hsa-miR-22-3p	down	ACVR1B	activin A receptor, type IB
hsa-miR-4505	up	ACVR1B	activin A receptor, type IB
hsa-miR-3620-5p	up	ACVR1B	activin A receptor, type IB
hsa-miR-4492	up	ACVR1B	activin A receptor, type IB
hsa-miR-101-3p	down	ACVR1C	activin A receptor, type IC
hsa-miR-181a-5p	down	ACVR2A	activin A receptor, type IIA
hsa-miR-15a-5p	down	ACVR2A	activin A receptor, type IIA
hsa-miR-181a-5p	down	ACVR2B	activin A receptor, type IIB
hsa-miR-22-3p	down	ACVR2B	activin A receptor, type IIB
hsa-miR-101-3p	down	ACVR2B	activin A receptor, type IIB
hsa-miR-194-5p	down	ACVR2B	activin A receptor, type IIB
hsa-miR-140-3p	down	ACVR2B	activin A receptor, type IIB
hsa-miR-98-5p	up	ACVR2B	activin A receptor, type IIB
hsa-miR-148b-3p	down	ACVR2B	activin A receptor, type IIB
hsa-miR-140-3p	down	ADAM17	ADAM metallopeptidase domain 17
hsa-miR-5096	up	ADCY1	adenylate cyclase 1 (brain)
hsa-miR-550a-5p	down	ADCY1	adenylate cyclase 1 (brain)
hsa-miR-361-5p	down	ADCY2	adenylate cyclase 2 (brain)
hsa-miR-148b-3p	down	ADCY2	adenylate cyclase 2 (brain)
hsa-miR-148a-3p	down	ADCY2	adenylate cyclase 2 (brain)
hsa-miR-15a-5p	down	ADCY5	adenylate cyclase 5
hsa-miR-22-3p	down	ADCY6	adenylate cyclase 6
hsa-miR-5787	up	ADCY6	adenylate cyclase 6
hsa-miR-101-3p	down	ADCY6	adenylate cyclase 6
hsa-miR-31-5p	down	ADCY6	adenylate cyclase 6
hsa-miR-6779-5p	up	ADCY6	adenylate cyclase 6
hsa-miR-4505	up	ADCY6	adenylate cyclase 6
hsa-miR-181a-5p	down	ADCY9	adenylate cyclase 9
hsa-miR-4484	up	ADCYAP1	adenylate cyclase activating polypeptide 1 (pituitary)
hsa-miR-30e-5p	down	ADRA1D	adrenergic, alpha-1D-, receptor
hsa-miR-181a-5p	down	ADRBK1	adrenergic, beta, receptor kinase 1
hsa-miR-5787	up	ADRBK1	adrenergic, beta, receptor kinase 1
hsa-miR-4505	up	ADRBK1	adrenergic, beta, receptor kinase 1
hsa-miR-181c-5p	down	ADRBK1	adrenergic, beta, receptor kinase 1
hsa-miR-4484	up	ADRBK1	adrenergic, beta, receptor kinase 1
hsa-miR-181a-5p	down	ADRBK2	adrenergic, beta, receptor kinase 2
hsa-miR-98-5p	up	ADRBK2	adrenergic, beta, receptor kinase 2
hsa-miR-181c-5p	down	ADRBK2	adrenergic, beta, receptor kinase 2
hsa-miR-194-5p	down	AFF1	AF4/FMR2 family, member 1
hsa-miR-5787	up	AGAP2	ArfGAP with GTPase domain, ankyrin repeat and PH domain 2
hsa-miR-423-5p	down	AGAP2	ArfGAP with GTPase domain, ankyrin repeat and PH domain 2
hsa-miR-4447	up	AGAP2	ArfGAP with GTPase domain, ankyrin repeat and PH domain 2
hsa-miR-1275	up	AGAP2	ArfGAP with GTPase domain, ankyrin repeat and PH domain 2
hsa-miR-4472	up	AGAP2	ArfGAP with GTPase domain, ankyrin repeat and PH domain 2
hsa-miR-4505	up	AGAP2	ArfGAP with GTPase domain, ankyrin repeat and PH domain 2
hsa-miR-15a-5p	down	AGAP3	ArfGAP with GTPase domain, ankyrin repeat and PH domain 3
hsa-miR-6803-5p	up	AGAP3	ArfGAP with GTPase domain, ankyrin repeat and PH domain 3
hsa-miR-423-5p	down	AGAP3	ArfGAP with GTPase domain, ankyrin repeat and PH domain 3
hsa-miR-6791-5p	up	AGAP3	ArfGAP with GTPase domain, ankyrin repeat and PH domain 3
hsa-miR-101-3p	down	AGFG1	ArfGAP with FG repeats 1
hsa-miR-4301	up	AGPAT4	1-acylglycerol-3-phosphate O-acyltransferase 4 (lysophosphatidic acid acyltransferase, delta)
hsa-miR-15a-5p	down	AGPAT6	1-acylglycerol-3-phosphate O-acyltransferase 6 (lysophosphatidic acid acyltransferase, zeta)
hsa-miR-15a-5p	down	AHCYL2	adenosylhomocysteinase-like 2
hsa-miR-140-3p	down	AHCYL2	adenosylhomocysteinase-like 2
hsa-miR-5787	up	AK1	adenylate kinase 1
hsa-miR-31-5p	down	AK2	adenylate kinase 2
hsa-miR-194-5p	down	AKT2	v-akt murine thymoma viral oncogene homolog 2
hsa-miR-98-5p	up	AKT2	v-akt murine thymoma viral oncogene homolog 2
hsa-miR-15a-5p	down	AKT3	v-akt murine thymoma viral oncogene homolog 3 (protein kinase B, gamma)
hsa-miR-148b-3p	down	ALCAM	activated leukocyte cell adhesion molecule
hsa-miR-148a-3p	down	ALCAM	activated leukocyte cell adhesion molecule
hsa-miR-140-3p	down	ALDH1A3	aldehyde dehydrogenase 1 family, member A3
hsa-miR-7150	up	ALDH7A1	aldehyde dehydrogenase 7 family, member A1
hsa-miR-30e-5p	down	ALG9	asparagine-linked glycosylation 9, alpha-1,2-mannosyltransferase homolog (S. cerevisiae)
hsa-miR-361-5p	down	ALG9	asparagine-linked glycosylation 9, alpha-1,2-mannosyltransferase homolog (S. cerevisiae)
hsa-miR-30d-5p	down	ALG9	asparagine-linked glycosylation 9, alpha-1,2-mannosyltransferase homolog (S. cerevisiae)
hsa-miR-98-5p	up	AMOT	angiomotin
hsa-miR-1275	up	AMOTL1	angiomotin like 1
hsa-miR-425-5p	down	AMPH	amphiphysin
hsa-miR-30c-1-3p	up	ANK1	ankyrin 1, erythrocytic
hsa-miR-148a-3p	down	ANK2	ankyrin 2, neuronal
hsa-miR-101-3p	down	ANK3	ankyrin 3, node of Ranvier (ankyrin G)
hsa-miR-3609	down	AP1S2	adaptor-related protein complex 1, sigma 2 subunit
hsa-miR-101-3p	down	AP3S1	adaptor-related protein complex 3, sigma 1 subunit
hsa-miR-30c-1-3p	up	AP3S2	adaptor-related protein complex 3, sigma 2 subunit
hsa-miR-148b-3p	down	AP4E1	adaptor-related protein complex 4, epsilon 1 subunit
hsa-miR-148a-3p	down	AP4E1	adaptor-related protein complex 4, epsilon 1 subunit
hsa-miR-5096	up	APPL1	adaptor protein, phosphotyrosine interaction, PH domain and leucine zipper containing 1
hsa-miR-3620-5p	up	AQP1	aquaporin 1 (Colton blood group)
hsa-miR-3609	down	AQP4	aquaporin 4
hsa-miR-7150	up	ARC	activity-regulated cytoskeleton-associated protein
hsa-miR-1275	up	ARFGAP2	ADP-ribosylation factor GTPase activating protein 2
hsa-miR-15a-5p	down	ARHGAP5	Rho GTPase activating protein 5
hsa-miR-15a-5p	down	ARHGDIA	Rho GDP dissociation inhibitor (GDI) alpha
hsa-miR-5787	up	ARHGDIA	Rho GDP dissociation inhibitor (GDI) alpha
hsa-miR-4505	up	ARHGDIA	Rho GDP dissociation inhibitor (GDI) alpha
hsa-miR-22-3p	down	ARHGEF12	Rho guanine nucleotide exchange factor (GEF) 12
hsa-miR-6073	up	ARHGEF12	Rho guanine nucleotide exchange factor (GEF) 12
hsa-miR-31-5p	down	ARHGEF2	Rho/Rac guanine nucleotide exchange factor (GEF) 2
hsa-miR-5787	up	ARHGEF4	Rho guanine nucleotide exchange factor (GEF) 4
hsa-miR-6779-5p	up	ARHGEF4	Rho guanine nucleotide exchange factor (GEF) 4
hsa-miR-30d-5p	down	ARHGEF6	Rac/Cdc42 guanine nucleotide exchange factor (GEF) 6
hsa-miR-4505	up	ARNT	aryl hydrocarbon receptor nuclear translocator
hsa-miR-181a-5p	down	ARNT2	aryl-hydrocarbon receptor nuclear translocator 2
hsa-miR-181c-5p	down	ARNT2	aryl-hydrocarbon receptor nuclear translocator 2
hsa-miR-22-3p	down	ARPC5	actin related protein 2/3 complex, subunit 5, 16kDa
hsa-miR-5787	up	ARRB2	arrestin, beta 2
hsa-miR-4505	up	ARRB2	arrestin, beta 2
hsa-miR-3609	down	ASAH1	N-acylsphingosine amidohydrolase (acid ceramidase) 1
hsa-miR-101-3p	down	ASAP1	ArfGAP with SH3 domain, ankyrin repeat and PH domain 1
hsa-miR-194-5p	down	ASAP1	ArfGAP with SH3 domain, ankyrin repeat and PH domain 1
hsa-miR-30d-5p	down	ATF1	activating transcription factor 1
hsa-miR-4447	up	ATP1B2	ATPase, Na+/K+ transporting, beta 2 polypeptide
hsa-miR-6126	up	ATP1B2	ATPase, Na+/K+ transporting, beta 2 polypeptide
hsa-miR-30c-1-3p	up	ATP1B2	ATPase, Na+/K+ transporting, beta 2 polypeptide
hsa-miR-5096	up	ATP1B4	ATPase, Na+/K+ transporting, beta 4 polypeptide
hsa-miR-15a-5p	down	ATP1B4	ATPase, Na+/K+ transporting, beta 4 polypeptide
hsa-miR-6779-5p	up	ATP1B4	ATPase, Na+/K+ transporting, beta 4 polypeptide
hsa-miR-30d-5p	down	ATP2A2	ATPase, Ca++ transporting, cardiac muscle, slow twitch 2
hsa-miR-98-5p	up	ATP2A2	ATPase, Ca++ transporting, cardiac muscle, slow twitch 2
hsa-miR-181a-5p	down	ATP2B1	ATPase, Ca++ transporting, plasma membrane 1
hsa-miR-15a-5p	down	ATP2B2	ATPase, Ca++ transporting, plasma membrane 2
hsa-miR-6073	up	ATP2B2	ATPase, Ca++ transporting, plasma membrane 2
hsa-miR-15a-5p	down	ATP2B3	ATPase, Ca++ transporting, plasma membrane 3
hsa-miR-4687-3p	up	ATP2B4	ATPase, Ca++ transporting, plasma membrane 4
hsa-miR-148b-3p	down	ATP2B4	ATPase, Ca++ transporting, plasma membrane 4
hsa-miR-148a-3p	down	ATP2B4	ATPase, Ca++ transporting, plasma membrane 4
hsa-miR-15a-5p	down	ATP6V1B2	ATPase, H+ transporting, lysosomal 56/58kDa, V1 subunit B2
hsa-miR-6779-5p	up	ATP6V1C1	ATPase, H+ transporting, lysosomal 42kDa, V1 subunit C1
hsa-miR-155-5p	up	ATP6V1G1	ATPase, H+ transporting, lysosomal 13kDa, V1 subunit G1
hsa-miR-148b-3p	down	ATP7A	ATPase, Cu++ transporting, alpha polypeptide
hsa-miR-181a-5p	down	ATXN3	ataxin 3
hsa-miR-181c-5p	down	ATXN3	ataxin 3
hsa-miR-7150	up	AXIN1	axin 1
hsa-miR-15a-5p	down	AXIN2	axin 2
hsa-miR-7150	up	B4GALNT1	beta-1,4-N-acetyl-galactosaminyl transferase 1
hsa-miR-15a-5p	down	B4GALT1	UDP-Gal:betaGlcNAc beta 1,4- galactosyltransferase, polypeptide 1
hsa-miR-6791-5p	up	B4GALT2	UDP-Gal:betaGlcNAc beta 1,4- galactosyltransferase, polypeptide 2
hsa-miR-30e-5p	down	B4GALT6	UDP-Gal:betaGlcNAc beta 1,4- galactosyltransferase, polypeptide 6
hsa-miR-30d-5p	down	B4GALT6	UDP-Gal:betaGlcNAc beta 1,4- galactosyltransferase, polypeptide 6
hsa-miR-148b-3p	down	B4GALT6	UDP-Gal:betaGlcNAc beta 1,4- galactosyltransferase, polypeptide 6
hsa-miR-148a-3p	down	B4GALT6	UDP-Gal:betaGlcNAc beta 1,4- galactosyltransferase, polypeptide 6
hsa-miR-4301	up	BACE1	beta-site APP-cleaving enzyme 1
hsa-miR-6791-5p	up	BAIAP2	BAI1-associated protein 2
hsa-miR-5787	up	BBC3	BCL2 binding component 3
hsa-miR-6791-5p	up	BBC3	BCL2 binding component 3
hsa-miR-4505	up	BBC3	BCL2 binding component 3
hsa-miR-98-5p	up	BCAT1	branched chain amino-acid transaminase 1, cytosolic
hsa-miR-6779-5p	up	BCAT2	branched chain amino-acid transaminase 2, mitochondrial
hsa-miR-30c-1-3p	up	BCAT2	branched chain amino-acid transaminase 2, mitochondrial
hsa-miR-15a-5p	down	BCL2	B-cell CLL/lymphoma 2
hsa-miR-140-3p	down	BCL2	B-cell CLL/lymphoma 2
hsa-miR-1273g-3p	up	BCL2L11	BCL2-like 11 (apoptosis facilitator)
hsa-miR-101-3p	down	BCL2L11	BCL2-like 11 (apoptosis facilitator)
hsa-miR-3609	down	BCL2L11	BCL2-like 11 (apoptosis facilitator)
hsa-miR-148b-3p	down	BCL2L11	BCL2-like 11 (apoptosis facilitator)
hsa-miR-148a-3p	down	BCL2L11	BCL2-like 11 (apoptosis facilitator)
hsa-miR-15a-5p	down	BHLHE41	basic helix-loop-helix family, member e41
hsa-miR-30e-5p	down	BIRC6	baculoviral IAP repeat containing 6
hsa-miR-1273g-3p	up	BMPR2	bone morphogenetic protein receptor, type II (serine/threonine kinase)
hsa-miR-3609	down	BMPR2	bone morphogenetic protein receptor, type II (serine/threonine kinase)
hsa-miR-3609	down	BTG2	BTG family, member 2
hsa-miR-15a-5p	down	BTRC	beta-transducin repeat containing E3 ubiquitin protein ligase
hsa-miR-5787	up	BTRC	beta-transducin repeat containing E3 ubiquitin protein ligase
hsa-miR-4505	up	BTRC	beta-transducin repeat containing E3 ubiquitin protein ligase
hsa-miR-3609	down	C2	complement component 2
hsa-miR-15a-5p	down	CAB39	calcium binding protein 39
hsa-miR-550a-5p	down	CAB39	calcium binding protein 39
hsa-miR-5787	up	CACNA1B	calcium channel, voltage-dependent, N type, alpha 1B subunit
hsa-miR-6791-5p	up	CACNA1C	calcium channel, voltage-dependent, L type, alpha 1C subunit
hsa-miR-4472	up	CACNA1C	calcium channel, voltage-dependent, L type, alpha 1C subunit
hsa-miR-15a-5p	down	CACNA1E	calcium channel, voltage-dependent, R type, alpha 1E subunit
hsa-miR-6803-5p	up	CACNA2D2	calcium channel, voltage-dependent, alpha 2/delta subunit 2
hsa-miR-423-5p	down	CACNA2D2	calcium channel, voltage-dependent, alpha 2/delta subunit 2
hsa-miR-6791-5p	up	CACNB1	calcium channel, voltage-dependent, beta 1 subunit
hsa-miR-101-3p	down	CACNB2	calcium channel, voltage-dependent, beta 2 subunit
hsa-miR-30c-1-3p	up	CACNB2	calcium channel, voltage-dependent, beta 2 subunit
hsa-miR-4492	up	CACNB3	calcium channel, voltage-dependent, beta 3 subunit
hsa-miR-550a-5p	down	CACNB3	calcium channel, voltage-dependent, beta 3 subunit
hsa-miR-101-3p	down	CADM1	cell adhesion molecule 1
hsa-miR-148b-3p	down	CADM1	cell adhesion molecule 1
hsa-miR-5787	up	CADM3	cell adhesion molecule 3
hsa-miR-181a-5p	down	CALCR	calcitonin receptor
hsa-miR-22-3p	down	CALCR	calcitonin receptor
hsa-miR-30d-5p	down	CALCR	calcitonin receptor
hsa-miR-31-5p	down	CALCR	calcitonin receptor
hsa-miR-15a-5p	down	CALM1	calmodulin 1 (phosphorylase kinase, delta)
hsa-miR-1246	up	CALM2	calmodulin 2 (phosphorylase kinase, delta)
hsa-miR-361-5p	down	CALM3	calmodulin 3 (phosphorylase kinase, delta)
hsa-miR-6791-5p	up	CAMK2A	calcium/calmodulin-dependent protein kinase II alpha
hsa-miR-7150	up	CAMK2A	calcium/calmodulin-dependent protein kinase II alpha
hsa-miR-30c-1-3p	up	CAMK2A	calcium/calmodulin-dependent protein kinase II alpha
hsa-miR-4492	up	CAMK2G	calcium/calmodulin-dependent protein kinase II gamma
hsa-miR-181a-5p	down	CAMKK1	calcium/calmodulin-dependent protein kinase kinase 1, alpha
hsa-miR-6791-5p	up	CAMKK1	calcium/calmodulin-dependent protein kinase kinase 1, alpha
hsa-miR-5096	up	CAMKK2	calcium/calmodulin-dependent protein kinase kinase 2, beta
hsa-miR-98-5p	up	CANT1	calcium activated nucleotidase 1
hsa-miR-22-3p	down	CAPN1	calpain 1, (mu/I) large subunit
hsa-miR-181a-5p	down	CARD11	caspase recruitment domain family, member 11
hsa-miR-181c-5p	down	CARD11	caspase recruitment domain family, member 11
hsa-miR-6803-5p	up	CASC3	cancer susceptibility candidate 3
hsa-miR-15a-5p	down	CASK	calcium/calmodulin-dependent serine protein kinase (MAGUK family)
hsa-miR-4687-3p	up	CASK	calcium/calmodulin-dependent serine protein kinase (MAGUK family)
hsa-miR-181a-5p	down	CASP10	caspase 10, apoptosis-related cysteine peptidase
hsa-miR-1246	up	CAV1	caveolin 1, caveolae protein, 22kDa
hsa-miR-22-3p	down	CAV3	caveolin 3
hsa-miR-22-3p	down	CBL	Cbl proto-oncogene, E3 ubiquitin protein ligase
hsa-miR-31-5p	down	CBL	Cbl proto-oncogene, E3 ubiquitin protein ligase
hsa-miR-140-3p	down	CBL	Cbl proto-oncogene, E3 ubiquitin protein ligase
hsa-miR-98-5p	up	CBL	Cbl proto-oncogene, E3 ubiquitin protein ligase
hsa-miR-6791-5p	up	CBL	Cbl proto-oncogene, E3 ubiquitin protein ligase
hsa-miR-4484	up	CBL	Cbl proto-oncogene, E3 ubiquitin protein ligase
hsa-miR-15a-5p	down	CCDC6	coiled-coil domain containing 6
hsa-miR-6803-5p	up	CCDC6	coiled-coil domain containing 6
hsa-miR-148b-3p	down	CCKBR	cholecystokinin B receptor
hsa-miR-148a-3p	down	CCKBR	cholecystokinin B receptor
hsa-miR-423-5p	down	CCL22	chemokine (C-C motif) ligand 22
hsa-miR-15a-5p	down	CCND1	cyclin D1
hsa-miR-15a-5p	down	CCND2	cyclin D2
hsa-miR-6791-5p	up	CCND2	cyclin D2
hsa-miR-15a-5p	down	CCNE1	cyclin E1
hsa-miR-181a-5p	down	CCNG1	cyclin G1
hsa-miR-181c-5p	down	CCNG1	cyclin G1
hsa-miR-15a-5p	down	CCNT2	cyclin T2
hsa-miR-140-3p	down	CCNT2	cyclin T2
hsa-miR-6073	up	CCNT2	cyclin T2
hsa-miR-30c-1-3p	up	CCR7	chemokine (C-C motif) receptor 7
hsa-miR-6779-5p	up	CD164	CD164 molecule, sialomucin
hsa-miR-140-3p	down	CD274	CD274 molecule
hsa-miR-15a-5p	down	CD28	CD28 molecule
hsa-miR-6791-5p	up	CD4	CD4 molecule
hsa-miR-181c-5p	down	CD4	CD4 molecule
hsa-miR-15a-5p	down	CDC14B	CDC14 cell division cycle 14 homolog B (S. cerevisiae)
hsa-miR-98-5p	up	CDC14B	CDC14 cell division cycle 14 homolog B (S. cerevisiae)
hsa-miR-181a-5p	down	CDC27	cell division cycle 27 homolog (S. cerevisiae)
hsa-miR-181c-5p	down	CDC27	cell division cycle 27 homolog (S. cerevisiae)
hsa-miR-98-5p	up	CDC34	cell division cycle 34 homolog (S. cerevisiae)
hsa-miR-15a-5p	down	CDC42	cell division cycle 42 (GTP binding protein, 25kDa)
hsa-miR-101-3p	down	CDH5	cadherin 5, type 2 (vascular endothelium)
hsa-miR-550a-5p	down	CDH5	cadherin 5, type 2 (vascular endothelium)
hsa-miR-15a-5p	down	CDK5R1	cyclin-dependent kinase 5, regulatory subunit 1 (p35)
hsa-miR-15a-5p	down	CDK6	cyclin-dependent kinase 6
hsa-miR-140-3p	down	CDK6	cyclin-dependent kinase 6
hsa-miR-22-3p	down	CDKN1A	cyclin-dependent kinase inhibitor 1A (p21, Cip1)
hsa-miR-5787	up	CDKN1A	cyclin-dependent kinase inhibitor 1A (p21, Cip1)
hsa-miR-7150	up	CFL1	cofilin 1 (non-muscle)
hsa-miR-7641	up	CFL2	cofilin 2 (muscle)
hsa-miR-15a-5p	down	CHEK1	checkpoint kinase 1
hsa-miR-31-5p	down	CHMP7	charged multivesicular body protein 7
hsa-miR-4447	up	CHRD	chordin
hsa-miR-4472	up	CHRD	chordin
hsa-miR-5787	up	CHRM1	cholinergic receptor, muscarinic 1
hsa-miR-6779-5p	up	CHRM1	cholinergic receptor, muscarinic 1
hsa-miR-4505	up	CHRM1	cholinergic receptor, muscarinic 1
hsa-miR-148a-3p	down	CHRNB2	cholinergic receptor, nicotinic, beta 2 (neuronal)
hsa-miR-22-3p	down	CIITA	class II, major histocompatibility complex, transactivator
hsa-miR-5787	up	CKM	creatine kinase, muscle
hsa-miR-5787	up	CLCF1	cardiotrophin-like cytokine factor 1
hsa-miR-4505	up	CLCF1	cardiotrophin-like cytokine factor 1
hsa-miR-7150	up	CLDN19	claudin 19
hsa-miR-15a-5p	down	CLDN2	claudin 2
hsa-miR-5787	up	CLDN7	claudin 7
hsa-miR-15a-5p	down	CLOCK	clock homolog (mouse)
hsa-miR-423-5p	down	CLTB	clathrin, light chain B
hsa-miR-3607-5p	down	CNOT2	CCR4-NOT transcription complex, subunit 2
hsa-miR-425-5p	down	CNOT4	CCR4-NOT transcription complex, subunit 4
hsa-miR-148b-3p	down	CNOT6	CCR4-NOT transcription complex, subunit 6
hsa-miR-148a-3p	down	CNOT6	CCR4-NOT transcription complex, subunit 6
hsa-miR-181a-5p	down	CNOT6L	CCR4-NOT transcription complex, subunit 6-like
hsa-miR-15a-5p	down	CNOT6L	CCR4-NOT transcription complex, subunit 6-like
hsa-miR-3609	down	CNOT6L	CCR4-NOT transcription complex, subunit 6-like
hsa-miR-3607-5p	down	CNOT6L	CCR4-NOT transcription complex, subunit 6-like
hsa-miR-181c-5p	down	CNOT6L	CCR4-NOT transcription complex, subunit 6-like
hsa-miR-181a-5p	down	CNR1	cannabinoid receptor 1 (brain)
hsa-miR-148b-3p	down	CNR1	cannabinoid receptor 1 (brain)
hsa-miR-148a-3p	down	CNR1	cannabinoid receptor 1 (brain)
hsa-miR-181c-5p	down	CNR1	cannabinoid receptor 1 (brain)
hsa-miR-5787	up	CNTFR	ciliary neurotrophic factor receptor
hsa-miR-6791-5p	up	CNTFR	ciliary neurotrophic factor receptor
hsa-miR-4505	up	CNTFR	ciliary neurotrophic factor receptor
hsa-miR-7150	up	CNTN2	contactin 2 (axonal)
hsa-miR-6779-5p	up	COL11A2	collagen, type XI, alpha 2
hsa-miR-98-5p	up	COL14A1	collagen, type XIV, alpha 1
hsa-miR-98-5p	up	COL15A1	collagen, type XV, alpha 1
hsa-miR-6779-5p	up	COL1A1	collagen, type I, alpha 1
hsa-miR-155-5p	up	COL21A1	collagen, type XXI, alpha 1
hsa-miR-15a-5p	down	COL24A1	collagen, type XXIV, alpha 1
hsa-miR-98-5p	up	COL4A2	collagen, type IV, alpha 2
hsa-miR-3607-5p	down	COL5A1	collagen, type V, alpha 1
hsa-miR-22-3p	down	CPEB1	cytoplasmic polyadenylation element binding protein 1
hsa-miR-5787	up	CPLX2	complexin 2
hsa-miR-423-5p	down	CPLX2	complexin 2
hsa-miR-425-5p	down	CPLX2	complexin 2
hsa-miR-6791-5p	up	CPLX2	complexin 2
hsa-miR-4505	up	CPLX2	complexin 2
hsa-miR-3620-5p	up	CPLX2	complexin 2
hsa-miR-4492	up	CPLX2	complexin 2
hsa-miR-5787	up	CPLX3	complexin 3
hsa-miR-6791-5p	up	CPLX3	complexin 3
hsa-miR-4505	up	CPLX3	complexin 3
hsa-miR-361-5p	down	CPOX	coproporphyrinogen oxidase
hsa-miR-181a-5p	down	CPSF6	cleavage and polyadenylation specific factor 6, 68kDa
hsa-miR-30e-5p	down	CPSF6	cleavage and polyadenylation specific factor 6, 68kDa
hsa-miR-30d-5p	down	CPSF6	cleavage and polyadenylation specific factor 6, 68kDa
hsa-miR-181c-5p	down	CPSF6	cleavage and polyadenylation specific factor 6, 68kDa
hsa-miR-181a-5p	down	CPT1A	carnitine palmitoyltransferase 1A (liver)
hsa-miR-148b-3p	down	CPT1A	carnitine palmitoyltransferase 1A (liver)
hsa-miR-98-5p	up	CRB2	crumbs homolog 2 (Drosophila)
hsa-miR-140-3p	down	CREB1	cAMP responsive element binding protein 1
hsa-miR-15a-5p	down	CRKL	v-crk sarcoma virus CT10 oncogene homolog (avian)-like
hsa-miR-5787	up	CRTC1	CREB regulated transcription coactivator 1
hsa-miR-4505	up	CRTC1	CREB regulated transcription coactivator 1
hsa-miR-4492	up	CRTC1	CREB regulated transcription coactivator 1
hsa-miR-423-5p	down	CRTC2	CREB regulated transcription coactivator 2
hsa-miR-4492	up	CRTC2	CREB regulated transcription coactivator 2
hsa-miR-5787	up	CRY2	cryptochrome 2 (photolyase-like)
hsa-miR-30c-1-3p	up	CRY2	cryptochrome 2 (photolyase-like)
hsa-miR-423-5p	down	CSF1	colony stimulating factor 1 (macrophage)
hsa-miR-4492	up	CSF1	colony stimulating factor 1 (macrophage)
hsa-miR-22-3p	down	CSF1R	colony stimulating factor 1 receptor
hsa-miR-5787	up	CSK	c-src tyrosine kinase
hsa-miR-181a-5p	down	CSNK1G1	casein kinase 1, gamma 1
hsa-miR-425-5p	down	CSNK1G1	casein kinase 1, gamma 1
hsa-miR-5787	up	CTNNBIP1	catenin, beta interacting protein 1
hsa-miR-4505	up	CTNNBIP1	catenin, beta interacting protein 1
hsa-miR-425-5p	down	CTNND1	catenin (cadherin-associated protein), delta 1
hsa-miR-6791-5p	up	CTNS	cystinosin, lysosomal cystine transporter
hsa-miR-550a-5p	down	CTPS2	CTP synthase II
hsa-miR-423-5p	down	CTSA	cathepsin A
hsa-miR-3609	down	CTSA	cathepsin A
hsa-miR-148b-3p	down	CTSA	cathepsin A
hsa-miR-15a-5p	down	CUL2	cullin 2
hsa-miR-22-3p	down	CUL3	cullin 3
hsa-miR-101-3p	down	CUL3	cullin 3
hsa-miR-194-5p	down	CUL4B	cullin 4B
hsa-miR-148b-3p	down	CUL5	cullin 5
hsa-miR-5787	up	CX3CL1	chemokine (C-X3-C motif) ligand 1
hsa-miR-4505	up	CX3CL1	chemokine (C-X3-C motif) ligand 1
hsa-miR-4492	up	CX3CL1	chemokine (C-X3-C motif) ligand 1
hsa-miR-30c-1-3p	up	CXCL12	chemokine (C-X-C motif) ligand 12
hsa-miR-6779-5p	up	CXCR5	chemokine (C-X-C motif) receptor 5
hsa-miR-98-5p	up	CYP19A1	cytochrome P450, family 19, subfamily A, polypeptide 1
hsa-miR-7150	up	CYP27B1	cytochrome P450, family 27, subfamily B, polypeptide 1
hsa-miR-30c-1-3p	up	DAAM2	dishevelled associated activator of morphogenesis 2
hsa-miR-4484	up	DAG1	dystroglycan 1 (dystrophin-associated glycoprotein 1)
hsa-miR-30d-5p	down	DAGLA	diacylglycerol lipase, alpha
hsa-miR-6803-5p	up	DAGLA	diacylglycerol lipase, alpha
hsa-miR-423-5p	down	DAGLA	diacylglycerol lipase, alpha
hsa-miR-6791-5p	up	DAGLA	diacylglycerol lipase, alpha
hsa-miR-6779-5p	up	DAGLA	diacylglycerol lipase, alpha
hsa-miR-4472	up	DAGLA	diacylglycerol lipase, alpha
hsa-miR-7150	up	DAGLA	diacylglycerol lipase, alpha
hsa-miR-98-5p	up	DAPK1	death-associated protein kinase 1
hsa-miR-6779-5p	up	DAPK2	death-associated protein kinase 2
hsa-miR-181a-5p	down	DCN	decorin
hsa-miR-181c-5p	down	DCN	decorin
hsa-miR-30e-5p	down	DCP1A	DCP1 decapping enzyme homolog A (S. cerevisiae)
hsa-miR-15a-5p	down	DCP1A	DCP1 decapping enzyme homolog A (S. cerevisiae)
hsa-miR-148a-3p	down	DCP2	DCP2 decapping enzyme homolog (S. cerevisiae)
hsa-miR-3607-5p	down	DCTD	dCMP deaminase
hsa-miR-30e-5p	down	DCTN4	dynactin 4 (p62)
hsa-miR-30d-5p	down	DCTN4	dynactin 4 (p62)
hsa-miR-6791-5p	up	DCTN5	dynactin 5 (p25)
hsa-miR-181a-5p	down	DDIT4	DNA-damage-inducible transcript 4
hsa-miR-30e-5p	down	DDIT4	DNA-damage-inducible transcript 4
hsa-miR-22-3p	down	DDIT4	DNA-damage-inducible transcript 4
hsa-miR-30d-5p	down	DDIT4	DNA-damage-inducible transcript 4
hsa-miR-101-3p	down	DDIT4	DNA-damage-inducible transcript 4
hsa-miR-181c-5p	down	DDIT4	DNA-damage-inducible transcript 4
hsa-miR-181a-5p	down	DDX3X	DEAD (Asp-Glu-Ala-Asp) box polypeptide 3, X-linked
hsa-miR-181c-5p	down	DDX3X	DEAD (Asp-Glu-Ala-Asp) box polypeptide 3, X-linked
hsa-miR-7150	up	DDX3X	DEAD (Asp-Glu-Ala-Asp) box polypeptide 3, X-linked
hsa-miR-181a-5p	down	DDX3Y	DEAD (Asp-Glu-Ala-Asp) box polypeptide 3, Y-linked
hsa-miR-181c-5p	down	DDX3Y	DEAD (Asp-Glu-Ala-Asp) box polypeptide 3, Y-linked
hsa-miR-6779-5p	up	DERL1	Der1-like domain family, member 1
hsa-miR-181c-5p	down	DERL1	Der1-like domain family, member 1
hsa-miR-155-5p	up	DET1	de-etiolated homolog 1 (Arabidopsis)
hsa-miR-7150	up	DGKA	diacylglycerol kinase, alpha 80kDa
hsa-miR-22-3p	down	DGKE	diacylglycerol kinase, epsilon 64kDa
hsa-miR-140-3p	down	DGKG	diacylglycerol kinase, gamma 90kDa
hsa-miR-6791-5p	up	DGKZ	diacylglycerol kinase, zeta
hsa-miR-31-5p	down	DHCR24	24-dehydrocholesterol reductase
hsa-miR-4505	up	DHCR24	24-dehydrocholesterol reductase
hsa-miR-6791-5p	up	DLG3	discs, large homolog 3 (Drosophila)
hsa-miR-30e-5p	down	DLGAP1	discs, large (Drosophila) homolog-associated protein 1
hsa-miR-30d-5p	down	DLGAP1	discs, large (Drosophila) homolog-associated protein 1
hsa-miR-15a-5p	down	DLST	dihydrolipoamide S-succinyltransferase (E2 component of 2-oxo-glutarate complex)
hsa-miR-98-5p	up	DLST	dihydrolipoamide S-succinyltransferase (E2 component of 2-oxo-glutarate complex)
hsa-miR-148b-3p	down	DNAJB12	DnaJ (Hsp40) homolog, subfamily B, member 12
hsa-miR-148a-3p	down	DNAJB12	DnaJ (Hsp40) homolog, subfamily B, member 12
hsa-miR-5787	up	DNM2	dynamin 2
hsa-miR-6791-5p	up	DNM2	dynamin 2
hsa-miR-4505	up	DNM2	dynamin 2
hsa-miR-22-3p	down	DNM3	dynamin 3
hsa-miR-6791-5p	up	DNMT3A	DNA (cytosine-5-)-methyltransferase 3 alpha
hsa-miR-6779-5p	up	DNMT3A	DNA (cytosine-5-)-methyltransferase 3 alpha
hsa-miR-7150	up	DNMT3A	DNA (cytosine-5-)-methyltransferase 3 alpha
hsa-miR-550a-5p	down	DNMT3B	DNA (cytosine-5-)-methyltransferase 3 beta
hsa-miR-31-5p	down	DOCK1	dedicator of cytokinesis 1
hsa-miR-15a-5p	down	DOLPP1	dolichyl pyrophosphate phosphatase 1
hsa-miR-22-3p	down	DPM2	dolichyl-phosphate mannosyltransferase polypeptide 2, regulatory subunit
hsa-miR-5787	up	DPYSL5	dihydropyrimidinase-like 5
hsa-miR-148b-3p	down	DPYSL5	dihydropyrimidinase-like 5
hsa-miR-148a-3p	down	DPYSL5	dihydropyrimidinase-like 5
hsa-miR-550a-5p	down	DPYSL5	dihydropyrimidinase-like 5
hsa-miR-4447	up	DTX3	deltex homolog 3 (Drosophila)
hsa-miR-4472	up	DTX3	deltex homolog 3 (Drosophila)
hsa-miR-7150	up	DTX3L	deltex 3-like (Drosophila)
hsa-miR-140-3p	down	DTX4	deltex homolog 4 (Drosophila)
hsa-miR-98-5p	up	DUSP16	dual specificity phosphatase 16
hsa-miR-98-5p	up	DUSP4	dual specificity phosphatase 4
hsa-miR-4734	down	DUSP8	dual specificity phosphatase 8
hsa-miR-1275	up	DUSP9	dual specificity phosphatase 9
hsa-miR-5787	up	DVL3	dishevelled, dsh homolog 3 (Drosophila)
hsa-miR-98-5p	up	DVL3	dishevelled, dsh homolog 3 (Drosophila)
hsa-miR-4505	up	DVL3	dishevelled, dsh homolog 3 (Drosophila)
hsa-miR-15a-5p	down	DYNC1LI2	dynein, cytoplasmic 1, light intermediate chain 2
hsa-miR-148b-3p	down	DYNLL2	dynein, light chain, LC8-type 2
hsa-miR-148a-3p	down	DYNLL2	dynein, light chain, LC8-type 2
hsa-miR-6791-5p	up	E2F1	E2F transcription factor 1
hsa-miR-31-5p	down	E2F2	E2F transcription factor 2
hsa-miR-98-5p	up	E2F2	E2F transcription factor 2
hsa-miR-6791-5p	up	E2F2	E2F transcription factor 2
hsa-miR-15a-5p	down	E2F3	E2F transcription factor 3
hsa-miR-30c-1-3p	up	E2F3	E2F transcription factor 3
hsa-miR-22-3p	down	EDA	ectodysplasin A
hsa-miR-15a-5p	down	EDA	ectodysplasin A
hsa-miR-5787	up	EDA	ectodysplasin A
hsa-miR-4687-3p	up	EDA	ectodysplasin A
hsa-miR-30e-5p	down	EDC3	enhancer of mRNA decapping 3 homolog (S. cerevisiae)
hsa-miR-30d-5p	down	EDC3	enhancer of mRNA decapping 3 homolog (S. cerevisiae)
hsa-miR-3607-5p	down	EDEM1	ER degradation enhancer, mannosidase alpha-like 1
hsa-miR-30e-5p	down	EDNRA	endothelin receptor type A
hsa-miR-30d-5p	down	EDNRA	endothelin receptor type A
hsa-miR-5787	up	EFNB3	ephrin-B3
hsa-miR-4505	up	EFNB3	ephrin-B3
hsa-miR-7150	up	EGLN2	egl nine homolog 2 (C. elegans)
hsa-miR-4687-3p	up	EGR1	early growth response 1
hsa-miR-140-3p	down	EGR3	early growth response 3
hsa-miR-550a-5p	down	EGR3	early growth response 3
hsa-miR-5787	up	EHD2	EH-domain containing 2
hsa-miR-4505	up	EHD2	EH-domain containing 2
hsa-miR-3609	down	EHD3	EH-domain containing 3
hsa-miR-7150	up	EI24	etoposide induced 2.4 mRNA
hsa-miR-15a-5p	down	EIF3A	eukaryotic translation initiation factor 3, subunit A
hsa-miR-181a-5p	down	EIF4A2	eukaryotic translation initiation factor 4A2
hsa-miR-181c-5p	down	EIF4A2	eukaryotic translation initiation factor 4A2
hsa-miR-15a-5p	down	EIF4B	eukaryotic translation initiation factor 4B
hsa-miR-1273g-3p	up	EIF4B	eukaryotic translation initiation factor 4B
hsa-miR-4484	up	EIF4E	eukaryotic translation initiation factor 4E
hsa-miR-3609	down	EIF4G3	eukaryotic translation initiation factor 4 gamma, 3
hsa-miR-3609	down	EIF5	eukaryotic translation initiation factor 5
hsa-miR-5787	up	ELK1	ELK1, member of ETS oncogene family
hsa-miR-6791-5p	up	ELK1	ELK1, member of ETS oncogene family
hsa-miR-6779-5p	up	ELK1	ELK1, member of ETS oncogene family
hsa-miR-1275	up	ELK1	ELK1, member of ETS oncogene family
hsa-miR-4505	up	ELK1	ELK1, member of ETS oncogene family
hsa-miR-3620-5p	up	ELK1	ELK1, member of ETS oncogene family
hsa-miR-4492	up	ELK1	ELK1, member of ETS oncogene family
hsa-miR-6791-5p	up	ELN	elastin
hsa-miR-15a-5p	down	ENAH	enabled homolog (Drosophila)
hsa-miR-6791-5p	up	ENAH	enabled homolog (Drosophila)
hsa-miR-7641	up	ENAH	enabled homolog (Drosophila)
hsa-miR-6126	up	ENAH	enabled homolog (Drosophila)
hsa-miR-7150	up	EP300	E1A binding protein p300
hsa-miR-181a-5p	down	EPB41	erythrocyte membrane protein band 4.1 (elliptocytosis 1, RH-linked)
hsa-miR-30e-5p	down	EPB41	erythrocyte membrane protein band 4.1 (elliptocytosis 1, RH-linked)
hsa-miR-6126	up	EPB41	erythrocyte membrane protein band 4.1 (elliptocytosis 1, RH-linked)
hsa-miR-181c-5p	down	EPB41	erythrocyte membrane protein band 4.1 (elliptocytosis 1, RH-linked)
hsa-miR-181a-5p	down	EPB41L3	erythrocyte membrane protein band 4.1-like 3
hsa-miR-181c-5p	down	EPB41L3	erythrocyte membrane protein band 4.1-like 3
hsa-miR-15a-5p	down	EPHA1	EPH receptor A1
hsa-miR-140-3p	down	EPHA4	EPH receptor A4
hsa-miR-98-5p	up	EPHA4	EPH receptor A4
hsa-miR-181a-5p	down	EPHA5	EPH receptor A5
hsa-miR-194-5p	down	EPHA5	EPH receptor A5
hsa-miR-4492	up	EPHA8	EPH receptor A8
hsa-miR-30d-5p	down	EPHB2	EPH receptor B2
hsa-miR-5787	up	EPHB3	EPH receptor B3
hsa-miR-4492	up	EPHB3	EPH receptor B3
hsa-miR-6791-5p	up	EPN2	epsin 2
hsa-miR-148b-3p	down	EPS15	epidermal growth factor receptor pathway substrate 15
hsa-miR-148a-3p	down	EPS15	epidermal growth factor receptor pathway substrate 15
hsa-miR-181c-5p	down	EPS15	epidermal growth factor receptor pathway substrate 15
hsa-miR-22-3p	down	ERBB3	v-erb-b2 erythroblastic leukemia viral oncogene homolog 3 (avian)
hsa-miR-101-3p	down	ERBB4	v-erb-a erythroblastic leukemia viral oncogene homolog 4 (avian)
hsa-miR-361-5p	down	ERG	v-ets erythroblastosis virus E26 oncogene homolog (avian)
hsa-miR-98-5p	up	ESPL1	extra spindle pole bodies homolog 1 (S. cerevisiae)
hsa-miR-181a-5p	down	ESR1	estrogen receptor 1
hsa-miR-22-3p	down	ESR1	estrogen receptor 1
hsa-miR-148a-3p	down	ESR1	estrogen receptor 1
hsa-miR-181c-5p	down	ESR1	estrogen receptor 1
hsa-miR-5096	up	ETF1	eukaryotic translation termination factor 1
hsa-miR-3607-5p	down	ETF1	eukaryotic translation termination factor 1
hsa-miR-15a-5p	down	ETNK1	ethanolamine kinase 1
hsa-miR-7641	up	ETNK1	ethanolamine kinase 1
hsa-miR-3609	down	ETS1	v-ets erythroblastosis virus E26 oncogene homolog 1 (avian)
hsa-miR-7641	up	ETS2	v-ets erythroblastosis virus E26 oncogene homolog 2 (avian)
hsa-miR-22-3p	down	ETV1	ets variant 1
hsa-miR-3609	down	ETV1	ets variant 1
hsa-miR-7150	up	ETV6	ets variant 6
hsa-miR-181a-5p	down	EXOSC3	exosome component 3
hsa-miR-181c-5p	down	EXOSC3	exosome component 3
hsa-miR-5096	up	EXTL3	exostoses (multiple)-like 3
hsa-miR-15a-5p	down	EYA1	eyes absent homolog 1 (Drosophila)
hsa-miR-101-3p	down	EYA1	eyes absent homolog 1 (Drosophila)
hsa-miR-6791-5p	up	EYA1	eyes absent homolog 1 (Drosophila)
hsa-miR-30e-5p	down	FAHD1	fumarylacetoacetate hydrolase domain containing 1
hsa-miR-30d-5p	down	FAHD1	fumarylacetoacetate hydrolase domain containing 1
hsa-miR-98-5p	up	FAS	Fas (TNF receptor superfamily, member 6)
hsa-miR-98-5p	up	FASLG	Fas ligand (TNF superfamily, member 6)
hsa-miR-3609	down	FBXL3	F-box and leucine-rich repeat protein 3
hsa-miR-22-3p	down	FBXW7	F-box and WD repeat domain containing 7, E3 ubiquitin protein ligase
hsa-miR-15a-5p	down	FBXW7	F-box and WD repeat domain containing 7, E3 ubiquitin protein ligase
hsa-miR-101-3p	down	FBXW7	F-box and WD repeat domain containing 7, E3 ubiquitin protein ligase
hsa-miR-6791-5p	up	FGD1	FYVE, RhoGEF and PH domain containing 1
hsa-miR-98-5p	up	FGF11	fibroblast growth factor 11
hsa-miR-6803-5p	up	FGF17	fibroblast growth factor 17
hsa-miR-155-5p	up	FGF7	fibroblast growth factor 7
hsa-miR-15a-5p	down	FGF9	fibroblast growth factor 9 (glia-activating factor)
hsa-miR-5787	up	FGFR1	fibroblast growth factor receptor 1
hsa-miR-4492	up	FGFR1	fibroblast growth factor receptor 1
hsa-miR-101-3p	down	FGFR3	fibroblast growth factor receptor 3
hsa-miR-30c-1-3p	up	FKBP5	FK506 binding protein 5
hsa-miR-5787	up	FLNC	filamin C, gamma
hsa-miR-4447	up	FLNC	filamin C, gamma
hsa-miR-4472	up	FLNC	filamin C, gamma
hsa-miR-4505	up	FLNC	filamin C, gamma
hsa-miR-5787	up	FLOT2	flotillin 2
hsa-miR-4505	up	FLOT2	flotillin 2
hsa-miR-6779-5p	up	FLT1	fms-related tyrosine kinase 1 (vascular endothelial growth factor/vascular permeability factor receptor)
hsa-miR-3620-5p	up	FLT1	fms-related tyrosine kinase 1 (vascular endothelial growth factor/vascular permeability factor receptor)
hsa-miR-15a-5p	down	FLT3	fms-related tyrosine kinase 3
hsa-miR-194-5p	down	FMR1	fragile X mental retardation 1
hsa-miR-148b-3p	down	FMR1	fragile X mental retardation 1
hsa-miR-148a-3p	down	FMR1	fragile X mental retardation 1
hsa-miR-181a-5p	down	FOS	FBJ murine osteosarcoma viral oncogene homolog
hsa-miR-101-3p	down	FOS	FBJ murine osteosarcoma viral oncogene homolog
hsa-miR-181c-5p	down	FOS	FBJ murine osteosarcoma viral oncogene homolog
hsa-miR-155-5p	up	FOS	FBJ murine osteosarcoma viral oncogene homolog
hsa-miR-5787	up	FOSB	FBJ murine osteosarcoma viral oncogene homolog B
hsa-miR-4505	up	FOSB	FBJ murine osteosarcoma viral oncogene homolog B
hsa-miR-7150	up	FOSB	FBJ murine osteosarcoma viral oncogene homolog B
hsa-miR-423-5p	down	FOSL2	FOS-like antigen 2
hsa-miR-6791-5p	up	FOSL2	FOS-like antigen 2
hsa-miR-15a-5p	down	FOXO1	forkhead box O1
hsa-miR-6073	up	FOXO1	forkhead box O1
hsa-miR-3607-5p	down	FOXO3	forkhead box O3
hsa-miR-155-5p	up	FOXO3	forkhead box O3
hsa-miR-181a-5p	down	FRS2	fibroblast growth factor receptor substrate 2
hsa-miR-3609	down	FRS2	fibroblast growth factor receptor substrate 2
hsa-miR-22-3p	down	FTL	ferritin, light polypeptide
hsa-miR-5787	up	FURIN	furin (paired basic amino acid cleaving enzyme)
hsa-miR-6779-5p	up	FURIN	furin (paired basic amino acid cleaving enzyme)
hsa-miR-4505	up	FURIN	furin (paired basic amino acid cleaving enzyme)
hsa-miR-22-3p	down	FUT9	fucosyltransferase 9 (alpha (1,3) fucosyltransferase)
hsa-miR-30e-5p	down	FZD3	frizzled family receptor 3
hsa-miR-1273g-3p	up	FZD3	frizzled family receptor 3
hsa-miR-31-5p	down	FZD4	frizzled family receptor 4
hsa-miR-194-5p	down	FZD4	frizzled family receptor 4
hsa-miR-6779-5p	up	FZD4	frizzled family receptor 4
hsa-miR-30c-1-3p	up	FZD4	frizzled family receptor 4
hsa-miR-101-3p	down	GAB1	GRB2-associated binding protein 1
hsa-miR-140-3p	down	GAB2	GRB2-associated binding protein 2
hsa-miR-6791-5p	up	GAB2	GRB2-associated binding protein 2
hsa-miR-6126	up	GAB2	GRB2-associated binding protein 2
hsa-miR-4492	up	GAB2	GRB2-associated binding protein 2
hsa-miR-140-3p	down	GABBR1	gamma-aminobutyric acid (GABA) B receptor, 1
hsa-miR-30c-1-3p	up	GABBR1	gamma-aminobutyric acid (GABA) B receptor, 1
hsa-miR-22-3p	down	GABBR2	gamma-aminobutyric acid (GABA) B receptor, 2
hsa-miR-101-3p	down	GABBR2	gamma-aminobutyric acid (GABA) B receptor, 2
hsa-miR-181a-5p	down	GABRA1	gamma-aminobutyric acid (GABA) A receptor, alpha 1
hsa-miR-181c-5p	down	GABRA1	gamma-aminobutyric acid (GABA) A receptor, alpha 1
hsa-miR-7150	up	GABRA3	gamma-aminobutyric acid (GABA) A receptor, alpha 3
hsa-miR-3620-5p	up	GABRA4	gamma-aminobutyric acid (GABA) A receptor, alpha 4
hsa-miR-101-3p	down	GABRB2	gamma-aminobutyric acid (GABA) A receptor, beta 2
hsa-miR-140-3p	down	GABRB2	gamma-aminobutyric acid (GABA) A receptor, beta 2
hsa-miR-181a-5p	down	GAD2	glutamate decarboxylase 2 (pancreatic islets and brain, 65kDa)
hsa-miR-181c-5p	down	GAD2	glutamate decarboxylase 2 (pancreatic islets and brain, 65kDa)
hsa-miR-6779-5p	up	GALE	UDP-galactose-4-epimerase
hsa-miR-30e-5p	down	GALNT1	UDP-N-acetyl-alpha-D-galactosamine:polypeptide N-acetylgalactosaminyltransferase 1 (GalNAc-T1)
hsa-miR-7150	up	GALNT10	UDP-N-acetyl-alpha-D-galactosamine:polypeptide N-acetylgalactosaminyltransferase 10 (GalNAc-T10)
hsa-miR-30e-5p	down	GALNT2	UDP-N-acetyl-alpha-D-galactosamine:polypeptide N-acetylgalactosaminyltransferase 2 (GalNAc-T2)
hsa-miR-30d-5p	down	GALNT2	UDP-N-acetyl-alpha-D-galactosamine:polypeptide N-acetylgalactosaminyltransferase 2 (GalNAc-T2)
hsa-miR-30e-5p	down	GALNT3	UDP-N-acetyl-alpha-D-galactosamine:polypeptide N-acetylgalactosaminyltransferase 3 (GalNAc-T3)
hsa-miR-30d-5p	down	GALNT3	UDP-N-acetyl-alpha-D-galactosamine:polypeptide N-acetylgalactosaminyltransferase 3 (GalNAc-T3)
hsa-miR-22-3p	down	GATM	glycine amidinotransferase (L-arginine:glycine amidinotransferase)
hsa-miR-98-5p	up	GATM	glycine amidinotransferase (L-arginine:glycine amidinotransferase)
hsa-miR-30e-5p	down	GCLC	glutamate-cysteine ligase, catalytic subunit
hsa-miR-155-5p	up	GCNT1	glucosaminyl (N-acetyl) transferase 1, core 2
hsa-miR-181a-5p	down	GCNT2	glucosaminyl (N-acetyl) transferase 2, I-branching enzyme (I blood group)
hsa-miR-30e-5p	down	GCNT2	glucosaminyl (N-acetyl) transferase 2, I-branching enzyme (I blood group)
hsa-miR-181c-5p	down	GCNT2	glucosaminyl (N-acetyl) transferase 2, I-branching enzyme (I blood group)
hsa-miR-98-5p	up	GDF6	growth differentiation factor 6
hsa-miR-148b-3p	down	GDF6	growth differentiation factor 6
hsa-miR-148a-3p	down	GDF6	growth differentiation factor 6
hsa-miR-6791-5p	up	GDF6	growth differentiation factor 6
hsa-miR-1275	up	GDF6	growth differentiation factor 6
hsa-miR-181a-5p	down	GFPT1	glutamine--fructose-6-phosphate transaminase 1
hsa-miR-181c-5p	down	GFPT1	glutamine--fructose-6-phosphate transaminase 1
hsa-miR-5787	up	GGA1	golgi-associated, gamma adaptin ear containing, ARF binding protein 1
hsa-miR-4505	up	GGA1	golgi-associated, gamma adaptin ear containing, ARF binding protein 1
hsa-miR-4492	up	GGA1	golgi-associated, gamma adaptin ear containing, ARF binding protein 1
hsa-miR-15a-5p	down	GGA3	golgi-associated, gamma adaptin ear containing, ARF binding protein 3
hsa-miR-5787	up	GGT7	gamma-glutamyltransferase 7
hsa-miR-6791-5p	up	GGT7	gamma-glutamyltransferase 7
hsa-miR-4505	up	GGT7	gamma-glutamyltransferase 7
hsa-miR-6803-5p	up	GIT1	G protein-coupled receptor kinase interacting ArfGAP 1
hsa-miR-1275	up	GIT1	G protein-coupled receptor kinase interacting ArfGAP 1
hsa-miR-4492	up	GIT1	G protein-coupled receptor kinase interacting ArfGAP 1
hsa-miR-30e-5p	down	GJA1	gap junction protein, alpha 1, 43kDa
hsa-miR-101-3p	down	GJA1	gap junction protein, alpha 1, 43kDa
hsa-miR-30e-5p	down	GLDC	glycine dehydrogenase (decarboxylating)
hsa-miR-140-3p	down	GLG1	golgi glycoprotein 1
hsa-miR-6791-5p	up	GLI1	GLI family zinc finger 1
hsa-miR-30d-5p	down	GLI2	GLI family zinc finger 2
hsa-miR-423-5p	down	GLP1R	glucagon-like peptide 1 receptor
hsa-miR-1275	up	GLP1R	glucagon-like peptide 1 receptor
hsa-miR-181a-5p	down	GLS	glutaminase
hsa-miR-15a-5p	down	GLS2	glutaminase 2 (liver, mitochondrial)
hsa-miR-4301	up	GLUL	glutamate-ammonia ligase
hsa-miR-22-3p	down	GM2A	GM2 ganglioside activator
hsa-miR-6779-5p	up	GNA12	guanine nucleotide binding protein (G protein) alpha 12
hsa-miR-30e-5p	down	GNAI2	guanine nucleotide binding protein (G protein), alpha inhibiting activity polypeptide 2
hsa-miR-3607-5p	down	GNAI2	guanine nucleotide binding protein (G protein), alpha inhibiting activity polypeptide 2
hsa-miR-3620-5p	up	GNAI2	guanine nucleotide binding protein (G protein), alpha inhibiting activity polypeptide 2
hsa-miR-4492	up	GNAI2	guanine nucleotide binding protein (G protein), alpha inhibiting activity polypeptide 2
hsa-miR-15a-5p	down	GNAI3	guanine nucleotide binding protein (G protein), alpha inhibiting activity polypeptide 3
hsa-miR-98-5p	up	GNAL	guanine nucleotide binding protein (G protein), alpha activating activity polypeptide, olfactory type
hsa-miR-3620-5p	up	GNAO1	guanine nucleotide binding protein (G protein), alpha activating activity polypeptide O
hsa-miR-550a-5p	down	GNAO1	guanine nucleotide binding protein (G protein), alpha activating activity polypeptide O
hsa-miR-4687-3p	up	GNAT1	guanine nucleotide binding protein (G protein), alpha transducing activity polypeptide 1
hsa-miR-181a-5p	down	GNB4	guanine nucleotide binding protein (G protein), beta polypeptide 4
hsa-miR-5096	up	GNB4	guanine nucleotide binding protein (G protein), beta polypeptide 4
hsa-miR-7641	up	GNB4	guanine nucleotide binding protein (G protein), beta polypeptide 4
hsa-miR-181c-5p	down	GNB4	guanine nucleotide binding protein (G protein), beta polypeptide 4
hsa-miR-7150	up	GNG12	guanine nucleotide binding protein (G protein), gamma 12
hsa-miR-194-5p	down	GNG2	guanine nucleotide binding protein (G protein), gamma 2
hsa-miR-98-5p	up	GNG5	guanine nucleotide binding protein (G protein), gamma 5
hsa-miR-30e-5p	down	GNPDA1	glucosamine-6-phosphate deaminase 1
hsa-miR-3609	down	GNRHR	gonadotropin-releasing hormone receptor
hsa-miR-1246	up	GNRHR	gonadotropin-releasing hormone receptor
hsa-miR-98-5p	up	GNS	glucosamine (N-acetyl)-6-sulfatase
hsa-miR-148b-3p	down	GNS	glucosamine (N-acetyl)-6-sulfatase
hsa-miR-4301	up	GOLPH3	golgi phosphoprotein 3 (coat-protein)
hsa-miR-6126	up	GOLPH3L	golgi phosphoprotein 3-like
hsa-miR-5787	up	GOSR2	golgi SNAP receptor complex member 2
hsa-miR-181a-5p	down	GOT2	glutamic-oxaloacetic transaminase 2, mitochondrial (aspartate aminotransferase 2)
hsa-miR-194-5p	down	GOT2	glutamic-oxaloacetic transaminase 2, mitochondrial (aspartate aminotransferase 2)
hsa-miR-181c-5p	down	GOT2	glutamic-oxaloacetic transaminase 2, mitochondrial (aspartate aminotransferase 2)
hsa-miR-140-3p	down	GPC3	glypican 3
hsa-miR-3609	down	GPC4	glypican 4
hsa-miR-6779-5p	up	GPD1	glycerol-3-phosphate dehydrogenase 1 (soluble)
hsa-miR-5096	up	GPR83	G protein-coupled receptor 83
hsa-miR-6779-5p	up	GPR83	G protein-coupled receptor 83
hsa-miR-3609	down	GRB2	growth factor receptor-bound protein 2
hsa-miR-1246	up	GRIA1	glutamate receptor, ionotropic, AMPA 1
hsa-miR-181a-5p	down	GRIA2	glutamate receptor, ionotropic, AMPA 2
hsa-miR-181c-5p	down	GRIA2	glutamate receptor, ionotropic, AMPA 2
hsa-miR-5096	up	GRIK2	glutamate receptor, ionotropic, kainate 2
hsa-miR-5787	up	GRIK3	glutamate receptor, ionotropic, kainate 3
hsa-miR-423-5p	down	GRIK3	glutamate receptor, ionotropic, kainate 3
hsa-miR-4638-5p	up	GRIK3	glutamate receptor, ionotropic, kainate 3
hsa-miR-4472	up	GRIK3	glutamate receptor, ionotropic, kainate 3
hsa-miR-6791-5p	up	GRIK5	glutamate receptor, ionotropic, kainate 5
hsa-miR-1273g-3p	up	GRIN1	glutamate receptor, ionotropic, N-methyl D-aspartate 1
hsa-miR-4734	down	GRIN1	glutamate receptor, ionotropic, N-methyl D-aspartate 1
hsa-miR-1275	up	GRIN1	glutamate receptor, ionotropic, N-methyl D-aspartate 1
hsa-miR-4687-3p	up	GRIN2A	glutamate receptor, ionotropic, N-methyl D-aspartate 2A
hsa-miR-155-5p	up	GRIN2A	glutamate receptor, ionotropic, N-methyl D-aspartate 2A
hsa-miR-4508	up	GRIN2D	glutamate receptor, ionotropic, N-methyl D-aspartate 2D
hsa-miR-181a-5p	down	GRM1	glutamate receptor, metabotropic 1
hsa-miR-4472	up	GRM1	glutamate receptor, metabotropic 1
hsa-miR-181c-5p	down	GRM1	glutamate receptor, metabotropic 1
hsa-miR-140-3p	down	GRM2	glutamate receptor, metabotropic 2
hsa-miR-4492	up	GRM2	glutamate receptor, metabotropic 2
hsa-miR-181a-5p	down	GRM5	glutamate receptor, metabotropic 5
hsa-miR-181c-5p	down	GRM5	glutamate receptor, metabotropic 5
hsa-miR-181a-5p	down	GRM7	glutamate receptor, metabotropic 7
hsa-miR-3609	down	GSK3B	glycogen synthase kinase 3 beta
hsa-miR-361-5p	down	GTF2E1	general transcription factor IIE, polypeptide 1, alpha 56kDa
hsa-miR-3609	down	GUCY1A3	guanylate cyclase 1, soluble, alpha 3
hsa-miR-101-3p	down	H2AFV	H2A histone family, member V
hsa-miR-22-3p	down	H3F3B	H3 histone, family 3B (H3.3B)
hsa-miR-30e-5p	down	H6PD	hexose-6-phosphate dehydrogenase (glucose 1-dehydrogenase)
hsa-miR-30d-5p	down	H6PD	hexose-6-phosphate dehydrogenase (glucose 1-dehydrogenase)
hsa-miR-7150	up	HBEGF	heparin-binding EGF-like growth factor
hsa-miR-30e-5p	down	HBS1L	HBS1-like (S. cerevisiae)
hsa-miR-3607-5p	down	HBS1L	HBS1-like (S. cerevisiae)
hsa-miR-22-3p	down	HDAC4	histone deacetylase 4
hsa-miR-140-3p	down	HDAC4	histone deacetylase 4
hsa-miR-5787	up	HDAC5	histone deacetylase 5
hsa-miR-22-3p	down	HDAC8	histone deacetylase 8
hsa-miR-4472	up	HDAC9	histone deacetylase 9
hsa-miR-361-5p	down	HERC4	HECT and RLD domain containing E3 ubiquitin protein ligase 4
hsa-miR-6791-5p	up	HGS	hepatocyte growth factor-regulated tyrosine kinase substrate
hsa-miR-148b-3p	down	HHEX	hematopoietically expressed homeobox
hsa-miR-148a-3p	down	HHEX	hematopoietically expressed homeobox
hsa-miR-181a-5p	down	HMBS	hydroxymethylbilane synthase
hsa-miR-15a-5p	down	HMGA2	high mobility group AT-hook 2
hsa-miR-98-5p	up	HMGA2	high mobility group AT-hook 2
hsa-miR-7150	up	HMGCL	3-hydroxymethyl-3-methylglutaryl-CoA lyase
hsa-miR-423-5p	down	HNRNPUL1	heterogeneous nuclear ribonucleoprotein U-like 1
hsa-miR-6791-5p	up	HNRNPUL1	heterogeneous nuclear ribonucleoprotein U-like 1
hsa-miR-148b-3p	down	HOMER1	homer homolog 1 (Drosophila)
hsa-miR-148a-3p	down	HOMER1	homer homolog 1 (Drosophila)
hsa-miR-15a-5p	down	HOXA10	homeobox A10
hsa-miR-181c-5p	down	HOXA11	homeobox A11
hsa-miR-423-5p	down	HOXC10	homeobox C10
hsa-miR-15a-5p	down	HPSE2	heparanase 2
hsa-miR-181a-5p	down	HS2ST1	heparan sulfate 2-O-sulfotransferase 1
hsa-miR-140-3p	down	HS2ST1	heparan sulfate 2-O-sulfotransferase 1
hsa-miR-98-5p	up	HS2ST1	heparan sulfate 2-O-sulfotransferase 1
hsa-miR-181c-5p	down	HS2ST1	heparan sulfate 2-O-sulfotransferase 1
hsa-miR-7150	up	HS2ST1	heparan sulfate 2-O-sulfotransferase 1
hsa-miR-194-5p	down	HS3ST2	heparan sulfate (glucosamine) 3-O-sulfotransferase 2
hsa-miR-140-3p	down	HS6ST2	heparan sulfate 6-O-sulfotransferase 2
hsa-miR-3609	down	HS6ST3	heparan sulfate 6-O-sulfotransferase 3
hsa-miR-15a-5p	down	HSPG2	heparan sulfate proteoglycan 2
hsa-miR-5787	up	HSPG2	heparan sulfate proteoglycan 2
hsa-miR-140-3p	down	HSPG2	heparan sulfate proteoglycan 2
hsa-miR-4505	up	HSPG2	heparan sulfate proteoglycan 2
hsa-miR-98-5p	up	HTR1E	5-hydroxytryptamine (serotonin) receptor 1E, G protein-coupled
hsa-miR-15a-5p	down	HTR2A	5-hydroxytryptamine (serotonin) receptor 2A, G protein-coupled
hsa-miR-15a-5p	down	HTR4	5-hydroxytryptamine (serotonin) receptor 4, G protein-coupled
hsa-miR-98-5p	up	HTR4	5-hydroxytryptamine (serotonin) receptor 4, G protein-coupled
hsa-miR-181a-5p	down	HYOU1	hypoxia up-regulated 1
hsa-miR-140-3p	down	HYOU1	hypoxia up-regulated 1
hsa-miR-181c-5p	down	HYOU1	hypoxia up-regulated 1
hsa-miR-4447	up	ICOSLG	inducible T-cell co-stimulator ligand
hsa-miR-3609	down	IDH1	isocitrate dehydrogenase 1 (NADP+), soluble
hsa-miR-3609	down	IDS	iduronate 2-sulfatase
hsa-miR-30e-5p	down	IFNAR2	interferon (alpha, beta and omega) receptor 2
hsa-miR-194-5p	down	IGF1	insulin-like growth factor 1 (somatomedin C)
hsa-miR-98-5p	up	IGF1	insulin-like growth factor 1 (somatomedin C)
hsa-miR-148b-3p	down	IGF1	insulin-like growth factor 1 (somatomedin C)
hsa-miR-148a-3p	down	IGF1	insulin-like growth factor 1 (somatomedin C)
hsa-miR-1275	up	IGF1	insulin-like growth factor 1 (somatomedin C)
hsa-miR-15a-5p	down	IGF1R	insulin-like growth factor 1 receptor
hsa-miR-1273g-3p	up	IGF1R	insulin-like growth factor 1 receptor
hsa-miR-194-5p	down	IGF1R	insulin-like growth factor 1 receptor
hsa-miR-98-5p	up	IGF1R	insulin-like growth factor 1 receptor
hsa-miR-15a-5p	down	IKBKB	inhibitor of kappa light polypeptide gene enhancer in B-cells, kinase beta
hsa-miR-5787	up	IL10RA	interleukin 10 receptor, alpha
hsa-miR-101-3p	down	IL13	interleukin 13
hsa-miR-98-5p	up	IL13	interleukin 13
hsa-miR-155-5p	up	IL13	interleukin 13
hsa-miR-1273g-3p	up	IL13RA1	interleukin 13 receptor, alpha 1
hsa-miR-15a-5p	down	IL15	interleukin 15
hsa-miR-181a-5p	down	IL2	interleukin 2
hsa-miR-181c-5p	down	IL2	interleukin 2
hsa-miR-550a-5p	down	IL20RA	interleukin 20 receptor, alpha
hsa-miR-15a-5p	down	IL2RB	interleukin 2 receptor, beta
hsa-miR-4505	up	ILK	integrin-linked kinase
hsa-miR-30c-1-3p	up	INHBE	inhibin, beta E
hsa-miR-30e-5p	down	INPP4A	inositol polyphosphate-4-phosphatase, type I, 107kDa
hsa-miR-30d-5p	down	INPP4A	inositol polyphosphate-4-phosphatase, type I, 107kDa
hsa-miR-155-5p	up	INPP4A	inositol polyphosphate-4-phosphatase, type I, 107kDa
hsa-miR-5096	up	INPP5A	inositol polyphosphate-5-phosphatase, 40kDa
hsa-miR-7150	up	INPP5K	inositol polyphosphate-5-phosphatase K
hsa-miR-550a-5p	down	INPP5K	inositol polyphosphate-5-phosphatase K
hsa-miR-15a-5p	down	INSR	insulin receptor
hsa-miR-181c-5p	down	IPPK	inositol 1,3,4,5,6-pentakisphosphate 2-kinase
hsa-miR-6779-5p	up	IQGAP1	IQ motif containing GTPase activating protein 1
hsa-miR-3607-5p	down	IQSEC1	IQ motif and Sec7 domain 1
hsa-miR-1273g-3p	up	IQSEC2	IQ motif and Sec7 domain 2
hsa-miR-6791-5p	up	IRF1	interferon regulatory factor 1
hsa-miR-15a-5p	down	IRS1	insulin receptor substrate 1
hsa-miR-181a-5p	down	IRS2	insulin receptor substrate 2
hsa-miR-30e-5p	down	IRS2	insulin receptor substrate 2
hsa-miR-15a-5p	down	IRS2	insulin receptor substrate 2
hsa-miR-30d-5p	down	IRS2	insulin receptor substrate 2
hsa-miR-98-5p	up	IRS2	insulin receptor substrate 2
hsa-miR-181c-5p	down	IRS2	insulin receptor substrate 2
hsa-miR-22-3p	down	ITGA10	integrin, alpha 10
hsa-miR-15a-5p	down	ITGA10	integrin, alpha 10
hsa-miR-148b-3p	down	ITGA11	integrin, alpha 11
hsa-miR-148a-3p	down	ITGA11	integrin, alpha 11
hsa-miR-181a-5p	down	ITGA3	integrin, alpha 3 (antigen CD49C, alpha 3 subunit of VLA-3 receptor)
hsa-miR-101-3p	down	ITGA3	integrin, alpha 3 (antigen CD49C, alpha 3 subunit of VLA-3 receptor)
hsa-miR-181c-5p	down	ITGA3	integrin, alpha 3 (antigen CD49C, alpha 3 subunit of VLA-3 receptor)
hsa-miR-3609	down	ITGA4	integrin, alpha 4 (antigen CD49D, alpha 4 subunit of VLA-4 receptor)
hsa-miR-30e-5p	down	ITGA5	integrin, alpha 5 (fibronectin receptor, alpha polypeptide)
hsa-miR-22-3p	down	ITGA5	integrin, alpha 5 (fibronectin receptor, alpha polypeptide)
hsa-miR-5787	up	ITGA5	integrin, alpha 5 (fibronectin receptor, alpha polypeptide)
hsa-miR-3620-5p	up	ITGA5	integrin, alpha 5 (fibronectin receptor, alpha polypeptide)
hsa-miR-181a-5p	down	ITGB8	integrin, beta 8
hsa-miR-22-3p	down	ITGB8	integrin, beta 8
hsa-miR-101-3p	down	ITGB8	integrin, beta 8
hsa-miR-98-5p	up	ITGB8	integrin, beta 8
hsa-miR-181c-5p	down	ITGB8	integrin, beta 8
hsa-miR-3620-5p	up	IVD	isovaleryl-CoA dehydrogenase
hsa-miR-140-3p	down	JAG1	jagged 1
hsa-miR-101-3p	down	JAK2	Janus kinase 2
hsa-miR-6073	up	JMJD1C	jumonji domain containing 1C
hsa-miR-1275	up	KAT2A	K(lysine) acetyltransferase 2A
hsa-miR-550a-5p	down	KAT2A	K(lysine) acetyltransferase 2A
hsa-miR-15a-5p	down	KCNK10	potassium channel, subfamily K, member 10
hsa-miR-3609	down	KCNK10	potassium channel, subfamily K, member 10
hsa-miR-3620-5p	up	KCNQ1	potassium voltage-gated channel, KQT-like subfamily, member 1
hsa-miR-4687-3p	up	KDM6A	lysine (K)-specific demethylase 6A
hsa-miR-7150	up	KDM6A	lysine (K)-specific demethylase 6A
hsa-miR-15a-5p	down	KIF5A	kinesin family member 5A
hsa-miR-140-3p	down	KIF5A	kinesin family member 5A
hsa-miR-101-3p	down	KIF5B	kinesin family member 5B
hsa-miR-181a-5p	down	KLF3	Kruppel-like factor 3 (basic)
hsa-miR-4505	up	KLF3	Kruppel-like factor 3 (basic)
hsa-miR-181c-5p	down	KLF3	Kruppel-like factor 3 (basic)
hsa-miR-181a-5p	down	KPNA1	karyopherin alpha 1 (importin alpha 5)
hsa-miR-101-3p	down	KPNA1	karyopherin alpha 1 (importin alpha 5)
hsa-miR-140-3p	down	KPNA1	karyopherin alpha 1 (importin alpha 5)
hsa-miR-181c-5p	down	KPNA1	karyopherin alpha 1 (importin alpha 5)
hsa-miR-181a-5p	down	KPNB1	karyopherin (importin) beta 1
hsa-miR-181c-5p	down	KPNB1	karyopherin (importin) beta 1
hsa-miR-15a-5p	down	KRAS	v-Ki-ras2 Kirsten rat sarcoma viral oncogene homolog
hsa-miR-1273g-3p	up	KRAS	v-Ki-ras2 Kirsten rat sarcoma viral oncogene homolog
hsa-miR-181c-5p	down	KRAS	v-Ki-ras2 Kirsten rat sarcoma viral oncogene homolog
hsa-miR-30e-5p	down	KSR1	kinase suppressor of ras 1
hsa-miR-5787	up	L1CAM	L1 cell adhesion molecule
hsa-miR-4505	up	L1CAM	L1 cell adhesion molecule
hsa-miR-3609	down	LAMA3	laminin, alpha 3
hsa-miR-5096	up	LAMA4	laminin, alpha 4
hsa-miR-148a-3p	down	LAMA4	laminin, alpha 4
hsa-miR-22-3p	down	LAMC1	laminin, gamma 1 (formerly LAMB2)
hsa-miR-6803-5p	up	LAMC1	laminin, gamma 1 (formerly LAMB2)
hsa-miR-550a-5p	down	LAMP1	lysosomal-associated membrane protein 1
hsa-miR-15a-5p	down	LAMP2	lysosomal-associated membrane protein 2
hsa-miR-155-5p	up	LAMP2	lysosomal-associated membrane protein 2
hsa-miR-5787	up	LAPTM5	lysosomal protein transmembrane 5
hsa-miR-4492	up	LAPTM5	lysosomal protein transmembrane 5
hsa-miR-22-3p	down	LAT	linker for activation of T cells
hsa-miR-3609	down	LAT	linker for activation of T cells
hsa-miR-31-5p	down	LATS2	LATS, large tumor suppressor, homolog 2 (Drosophila)
hsa-miR-6791-5p	up	LDB1	LIM domain binding 1
hsa-miR-148b-3p	down	LDLR	low density lipoprotein receptor
hsa-miR-148a-3p	down	LDLR	low density lipoprotein receptor
hsa-miR-6779-5p	up	LHB	luteinizing hormone beta polypeptide
hsa-miR-3609	down	LIF	leukemia inhibitory factor
hsa-miR-101-3p	down	LIFR	leukemia inhibitory factor receptor alpha
hsa-miR-3620-5p	up	LIFR	leukemia inhibitory factor receptor alpha
hsa-miR-6073	up	LIFR	leukemia inhibitory factor receptor alpha
hsa-miR-5787	up	LIMK2	LIM domain kinase 2
hsa-miR-98-5p	up	LIMK2	LIM domain kinase 2
hsa-miR-4505	up	LIMK2	LIM domain kinase 2
hsa-miR-6791-5p	up	LPAR5	lysophosphatidic acid receptor 5
hsa-miR-5787	up	LPCAT3	lysophosphatidylcholine acyltransferase 3
hsa-miR-98-5p	up	LPGAT1	lysophosphatidylglycerol acyltransferase 1
hsa-miR-181c-5p	down	LPGAT1	lysophosphatidylglycerol acyltransferase 1
hsa-miR-1246	up	LPIN2	lipin 2
hsa-miR-5787	up	LRP1	low density lipoprotein receptor-related protein 1
hsa-miR-4505	up	LRP1	low density lipoprotein receptor-related protein 1
hsa-miR-181a-5p	down	LRP6	low density lipoprotein receptor-related protein 6
hsa-miR-15a-5p	down	LRP6	low density lipoprotein receptor-related protein 6
hsa-miR-181c-5p	down	LRP6	low density lipoprotein receptor-related protein 6
hsa-miR-6126	up	LSS	lanosterol synthase (2,3-oxidosqualene-lanosterol cyclase)
hsa-miR-22-3p	down	LTB4R	leukotriene B4 receptor
hsa-miR-181c-5p	down	LYPLA2	lysophospholipase II
hsa-miR-1275	up	M6PR	mannose-6-phosphate receptor (cation dependent)
hsa-miR-30c-1-3p	up	M6PR	mannose-6-phosphate receptor (cation dependent)
hsa-miR-4447	up	MAG	myelin associated glycoprotein
hsa-miR-4472	up	MAG	myelin associated glycoprotein
hsa-miR-101-3p	down	MAGI1	membrane associated guanylate kinase, WW and PDZ domain containing 1
hsa-miR-148b-3p	down	MAGI1	membrane associated guanylate kinase, WW and PDZ domain containing 1
hsa-miR-148a-3p	down	MAGI1	membrane associated guanylate kinase, WW and PDZ domain containing 1
hsa-miR-30e-5p	down	MAGI2	membrane associated guanylate kinase, WW and PDZ domain containing 2
hsa-miR-6791-5p	up	MAML1	mastermind-like 1 (Drosophila)
hsa-miR-15a-5p	down	MAP2K1	mitogen-activated protein kinase kinase 1
hsa-miR-7150	up	MAP2K4	mitogen-activated protein kinase kinase 4
hsa-miR-5787	up	MAP2K7	mitogen-activated protein kinase kinase 7
hsa-miR-6791-5p	up	MAP2K7	mitogen-activated protein kinase kinase 7
hsa-miR-4505	up	MAP2K7	mitogen-activated protein kinase kinase 7
hsa-miR-31-5p	down	MAP3K1	mitogen-activated protein kinase kinase kinase 1, E3 ubiquitin protein ligase
hsa-miR-98-5p	up	MAP3K1	mitogen-activated protein kinase kinase kinase 1, E3 ubiquitin protein ligase
hsa-miR-6791-5p	up	MAP3K11	mitogen-activated protein kinase kinase kinase 11
hsa-miR-30e-5p	down	MAP3K12	mitogen-activated protein kinase kinase kinase 12
hsa-miR-22-3p	down	MAP3K12	mitogen-activated protein kinase kinase kinase 12
hsa-miR-5096	up	MAP3K12	mitogen-activated protein kinase kinase kinase 12
hsa-miR-31-5p	down	MAP3K14	mitogen-activated protein kinase kinase kinase 14
hsa-miR-6779-5p	up	MAP3K14	mitogen-activated protein kinase kinase kinase 14
hsa-miR-155-5p	up	MAP3K14	mitogen-activated protein kinase kinase kinase 14
hsa-miR-5787	up	MAP3K3	mitogen-activated protein kinase kinase kinase 3
hsa-miR-6791-5p	up	MAP3K3	mitogen-activated protein kinase kinase kinase 3
hsa-miR-4505	up	MAP3K3	mitogen-activated protein kinase kinase kinase 3
hsa-miR-148b-3p	down	MAP3K4	mitogen-activated protein kinase kinase kinase 4
hsa-miR-148a-3p	down	MAP3K4	mitogen-activated protein kinase kinase kinase 4
hsa-miR-30e-5p	down	MAP3K5	mitogen-activated protein kinase kinase kinase 5
hsa-miR-98-5p	up	MAP4K3	mitogen-activated protein kinase kinase kinase kinase 3
hsa-miR-181a-5p	down	MAP4K4	mitogen-activated protein kinase kinase kinase kinase 4
hsa-miR-30d-5p	down	MAP4K4	mitogen-activated protein kinase kinase kinase kinase 4
hsa-miR-181c-5p	down	MAP4K4	mitogen-activated protein kinase kinase kinase kinase 4
hsa-miR-1273g-3p	up	MAPK1	mitogen-activated protein kinase 1
hsa-miR-194-5p	down	MAPK1	mitogen-activated protein kinase 1
hsa-miR-140-3p	down	MAPK1	mitogen-activated protein kinase 1
hsa-miR-3609	down	MAPK1	mitogen-activated protein kinase 1
hsa-miR-22-3p	down	MAPK14	mitogen-activated protein kinase 14
hsa-miR-140-3p	down	MARCH6	membrane-associated ring finger (C3HC4) 6, E3 ubiquitin protein ligase
hsa-miR-140-3p	down	MARCKS	myristoylated alanine-rich protein kinase C substrate
hsa-miR-5787	up	MARCKSL1	MARCKS-like 1
hsa-miR-22-3p	down	MAVS	mitochondrial antiviral signaling protein
hsa-miR-22-3p	down	MAX	MYC associated factor X
hsa-miR-30e-5p	down	MBOAT1	membrane bound O-acyltransferase domain containing 1
hsa-miR-30d-5p	down	MBOAT1	membrane bound O-acyltransferase domain containing 1
hsa-miR-6779-5p	up	MBOAT2	membrane bound O-acyltransferase domain containing 2
hsa-miR-1246	up	MC2R	melanocortin 2 receptor (adrenocorticotropic hormone)
hsa-miR-30c-1-3p	up	MCHR1	melanin-concentrating hormone receptor 1
hsa-miR-101-3p	down	MCL1	myeloid cell leukemia sequence 1 (BCL2-related)
hsa-miR-98-5p	up	MDM4	Mdm4 p53 binding protein homolog (mouse)
hsa-miR-148b-3p	down	MDM4	Mdm4 p53 binding protein homolog (mouse)
hsa-miR-148a-3p	down	MDM4	Mdm4 p53 binding protein homolog (mouse)
hsa-miR-3609	down	MEF2C	myocyte enhancer factor 2C
hsa-miR-5787	up	MFNG	MFNG O-fucosylpeptide 3-beta-N-acetylglucosaminyltransferase
hsa-miR-4505	up	MFNG	MFNG O-fucosylpeptide 3-beta-N-acetylglucosaminyltransferase
hsa-miR-98-5p	up	MFSD8	major facilitator superfamily domain containing 8
hsa-miR-423-5p	down	MGAT3	mannosyl (beta-1,4-)-glycoprotein beta-1,4-N-acetylglucosaminyltransferase
hsa-miR-98-5p	up	MGAT3	mannosyl (beta-1,4-)-glycoprotein beta-1,4-N-acetylglucosaminyltransferase
hsa-miR-5096	up	MGAT4A	mannosyl (alpha-1,3-)-glycoprotein beta-1,4-N-acetylglucosaminyltransferase, isozyme A
hsa-miR-15a-5p	down	MGAT4A	mannosyl (alpha-1,3-)-glycoprotein beta-1,4-N-acetylglucosaminyltransferase, isozyme A
hsa-miR-5787	up	MGAT4A	mannosyl (alpha-1,3-)-glycoprotein beta-1,4-N-acetylglucosaminyltransferase, isozyme A
hsa-miR-101-3p	down	MGAT4A	mannosyl (alpha-1,3-)-glycoprotein beta-1,4-N-acetylglucosaminyltransferase, isozyme A
hsa-miR-148b-3p	down	MGAT4A	mannosyl (alpha-1,3-)-glycoprotein beta-1,4-N-acetylglucosaminyltransferase, isozyme A
hsa-miR-148a-3p	down	MGAT4A	mannosyl (alpha-1,3-)-glycoprotein beta-1,4-N-acetylglucosaminyltransferase, isozyme A
hsa-miR-4447	up	MGAT4B	mannosyl (alpha-1,3-)-glycoprotein beta-1,4-N-acetylglucosaminyltransferase, isozyme B
hsa-miR-194-5p	down	MGLL	monoglyceride lipase
hsa-miR-423-5p	down	MGLL	monoglyceride lipase
hsa-miR-5096	up	MID1	midline 1 (Opitz/BBB syndrome)
hsa-miR-194-5p	down	MITF	microphthalmia-associated transcription factor
hsa-miR-148b-3p	down	MITF	microphthalmia-associated transcription factor
hsa-miR-15a-5p	down	MKNK1	MAP kinase interacting serine/threonine kinase 1
hsa-miR-3609	down	MKNK1	MAP kinase interacting serine/threonine kinase 1
hsa-miR-181a-5p	down	MLF1	myeloid leukemia factor 1
hsa-miR-98-5p	up	MLLT4	myeloid/lymphoid or mixed-lineage leukemia (trithorax homolog, Drosophila); translocated to, 4
hsa-miR-3620-5p	up	MMAB	methylmalonic aciduria (cobalamin deficiency) cblB type
hsa-miR-4492	up	MMP14	matrix metallopeptidase 14 (membrane-inserted)
hsa-miR-1273g-3p	up	MMP2	matrix metallopeptidase 2 (gelatinase A, 72kDa gelatinase, 72kDa type IV collagenase)
hsa-miR-22-3p	down	MOCS1	molybdenum cofactor synthesis 1
hsa-miR-31-5p	down	MOCS1	molybdenum cofactor synthesis 1
hsa-miR-140-3p	down	MOCS2	molybdenum cofactor synthesis 2
hsa-miR-3609	down	MPDZ	multiple PDZ domain protein
hsa-miR-425-5p	down	MPP5	membrane protein, palmitoylated 5 (MAGUK p55 subfamily member 5)
hsa-miR-1275	up	MPZ	myelin protein zero
hsa-miR-15a-5p	down	MRAS	muscle RAS oncogene homolog
hsa-miR-550a-5p	down	MRVI1	murine retrovirus integration site 1 homolog
hsa-miR-4687-3p	up	MSH3	mutS homolog 3 (E. coli)
hsa-miR-5787	up	MSI1	musashi homolog 1 (Drosophila)
hsa-miR-6803-5p	up	MSI1	musashi homolog 1 (Drosophila)
hsa-miR-4447	up	MSI1	musashi homolog 1 (Drosophila)
hsa-miR-6791-5p	up	MSI1	musashi homolog 1 (Drosophila)
hsa-miR-4505	up	MSI1	musashi homolog 1 (Drosophila)
hsa-miR-181a-5p	down	MSI2	musashi homolog 2 (Drosophila)
hsa-miR-6779-5p	up	MSN	moesin
hsa-miR-22-3p	down	MTHFR	methylenetetrahydrofolate reductase (NAD(P)H)
hsa-miR-15a-5p	down	MYB	v-myb myeloblastosis viral oncogene homolog (avian)
hsa-miR-140-3p	down	MYB	v-myb myeloblastosis viral oncogene homolog (avian)
hsa-miR-181a-5p	down	MYBL1	v-myb myeloblastosis viral oncogene homolog (avian)-like 1
hsa-miR-181c-5p	down	MYBL1	v-myb myeloblastosis viral oncogene homolog (avian)-like 1
hsa-miR-101-3p	down	MYCN	v-myc myelocytomatosis viral related oncogene, neuroblastoma derived (avian)
hsa-miR-3609	down	MYCN	v-myc myelocytomatosis viral related oncogene, neuroblastoma derived (avian)
hsa-miR-155-5p	up	MYLK	myosin light chain kinase
hsa-miR-4492	up	MYLK2	myosin light chain kinase 2
hsa-miR-15a-5p	down	MYLK4	myosin light chain kinase family, member 4
hsa-miR-140-3p	down	MYLK4	myosin light chain kinase family, member 4
hsa-miR-7150	up	MYLK4	myosin light chain kinase family, member 4
hsa-miR-155-5p	up	MYO10	myosin X
hsa-miR-30e-5p	down	NADK	NAD kinase
hsa-miR-3620-5p	up	NCOR1	nuclear receptor corepressor 1
hsa-miR-30e-5p	down	NCOR2	nuclear receptor corepressor 2
hsa-miR-15a-5p	down	NCOR2	nuclear receptor corepressor 2
hsa-miR-30d-5p	down	NCOR2	nuclear receptor corepressor 2
hsa-miR-3620-5p	up	NCSTN	nicastrin
hsa-miR-5787	up	NDST1	N-deacetylase/N-sulfotransferase (heparan glucosaminyl) 1
hsa-miR-140-3p	down	NDST1	N-deacetylase/N-sulfotransferase (heparan glucosaminyl) 1
hsa-miR-6779-5p	up	NDST1	N-deacetylase/N-sulfotransferase (heparan glucosaminyl) 1
hsa-miR-4505	up	NDST1	N-deacetylase/N-sulfotransferase (heparan glucosaminyl) 1
hsa-miR-361-5p	down	NDST3	N-deacetylase/N-sulfotransferase (heparan glucosaminyl) 3
hsa-miR-98-5p	up	NDST3	N-deacetylase/N-sulfotransferase (heparan glucosaminyl) 3
hsa-miR-30e-5p	down	NEDD4	neural precursor cell expressed, developmentally down-regulated 4, E3 ubiquitin protein ligase
hsa-miR-30e-5p	down	NEFL	neurofilament, light polypeptide
hsa-miR-30d-5p	down	NEFL	neurofilament, light polypeptide
hsa-miR-181a-5p	down	NEO1	neogenin 1
hsa-miR-5787	up	NF2	neurofibromin 2 (merlin)
hsa-miR-6791-5p	up	NF2	neurofibromin 2 (merlin)
hsa-miR-4505	up	NF2	neurofibromin 2 (merlin)
hsa-miR-6791-5p	up	NFASC	neurofascin
hsa-miR-6126	up	NFASC	neurofascin
hsa-miR-155-5p	up	NFASC	neurofascin
hsa-miR-3620-5p	up	NFASC	neurofascin
hsa-miR-7150	up	NFASC	neurofascin
hsa-miR-181a-5p	down	NFAT5	nuclear factor of activated T-cells 5, tonicity-responsive
hsa-miR-361-5p	down	NFAT5	nuclear factor of activated T-cells 5, tonicity-responsive
hsa-miR-30d-5p	down	NFAT5	nuclear factor of activated T-cells 5, tonicity-responsive
hsa-miR-140-3p	down	NFAT5	nuclear factor of activated T-cells 5, tonicity-responsive
hsa-miR-3609	down	NFAT5	nuclear factor of activated T-cells 5, tonicity-responsive
hsa-miR-181c-5p	down	NFAT5	nuclear factor of activated T-cells 5, tonicity-responsive
hsa-miR-423-5p	down	NFATC4	nuclear factor of activated T-cells, cytoplasmic, calcineurin-dependent 4
hsa-miR-22-3p	down	NFYA	nuclear transcription factor Y, alpha
hsa-miR-140-3p	down	NFYA	nuclear transcription factor Y, alpha
hsa-miR-6791-5p	up	NFYA	nuclear transcription factor Y, alpha
hsa-miR-1275	up	NFYA	nuclear transcription factor Y, alpha
hsa-miR-3620-5p	up	NFYA	nuclear transcription factor Y, alpha
hsa-miR-5096	up	NFYB	nuclear transcription factor Y, beta
hsa-miR-6791-5p	up	NFYC	nuclear transcription factor Y, gamma
hsa-miR-5787	up	NGFR	nerve growth factor receptor
hsa-miR-6791-5p	up	NGFR	nerve growth factor receptor
hsa-miR-4472	up	NGFR	nerve growth factor receptor
hsa-miR-4505	up	NGFR	nerve growth factor receptor
hsa-miR-15a-5p	down	NKD1	naked cuticle homolog 1 (Drosophila)
hsa-miR-98-5p	up	NKD1	naked cuticle homolog 1 (Drosophila)
hsa-miR-6791-5p	up	NKD1	naked cuticle homolog 1 (Drosophila)
hsa-miR-4687-3p	up	NLGN2	neuroligin 2
hsa-miR-6779-5p	up	NLGN3	neuroligin 3
hsa-miR-5096	up	NLK	nemo-like kinase
hsa-miR-101-3p	down	NLK	nemo-like kinase
hsa-miR-3609	down	NLK	nemo-like kinase
hsa-miR-98-5p	up	NME4	non-metastatic cells 4, protein expressed in
hsa-miR-6791-5p	up	NMNAT2	nicotinamide nucleotide adenylyltransferase 2
hsa-miR-30c-1-3p	up	NMNAT2	nicotinamide nucleotide adenylyltransferase 2
hsa-miR-5787	up	NOS1AP	nitric oxide synthase 1 (neuronal) adaptor protein
hsa-miR-4505	up	NOS1AP	nitric oxide synthase 1 (neuronal) adaptor protein
hsa-miR-15a-5p	down	NOTCH2	notch 2
hsa-miR-4447	up	NOTCH2	notch 2
hsa-miR-1275	up	NR1D1	nuclear receptor subfamily 1, group D, member 1
hsa-miR-181a-5p	down	NR3C1	nuclear receptor subfamily 3, group C, member 1 (glucocorticoid receptor)
hsa-miR-22-3p	down	NR3C1	nuclear receptor subfamily 3, group C, member 1 (glucocorticoid receptor)
hsa-miR-5096	up	NR3C1	nuclear receptor subfamily 3, group C, member 1 (glucocorticoid receptor)
hsa-miR-181c-5p	down	NR3C1	nuclear receptor subfamily 3, group C, member 1 (glucocorticoid receptor)
hsa-miR-101-3p	down	NR4A3	nuclear receptor subfamily 4, group A, member 3
hsa-miR-4687-3p	up	NR4A3	nuclear receptor subfamily 4, group A, member 3
hsa-miR-22-3p	down	NRAS	neuroblastoma RAS viral (v-ras) oncogene homolog
hsa-miR-15a-5p	down	NRG1	neuregulin 1
hsa-miR-30d-5p	down	NRG3	neuregulin 3
hsa-miR-140-3p	down	NRG3	neuregulin 3
hsa-miR-181a-5p	down	NRP1	neuropilin 1
hsa-miR-140-3p	down	NSF	N-ethylmaleimide-sensitive factor
hsa-miR-423-5p	down	NTN1	netrin 1
hsa-miR-98-5p	up	NTN1	netrin 1
hsa-miR-3609	down	NTN1	netrin 1
hsa-miR-6779-5p	up	NTN1	netrin 1
hsa-miR-4492	up	NTN1	netrin 1
hsa-miR-550a-5p	down	NTN1	netrin 1
hsa-miR-30e-5p	down	NTNG1	netrin G1
hsa-miR-22-3p	down	NTRK2	neurotrophic tyrosine kinase, receptor, type 2
hsa-miR-3609	down	NTRK2	neurotrophic tyrosine kinase, receptor, type 2
hsa-miR-155-5p	up	NTRK2	neurotrophic tyrosine kinase, receptor, type 2
hsa-miR-423-5p	down	NTRK3	neurotrophic tyrosine kinase, receptor, type 3
hsa-miR-3609	down	NTRK3	neurotrophic tyrosine kinase, receptor, type 3
hsa-miR-7150	up	NTRK3	neurotrophic tyrosine kinase, receptor, type 3
hsa-miR-30c-1-3p	up	NTRK3	neurotrophic tyrosine kinase, receptor, type 3
hsa-miR-181a-5p	down	NUDT21	nudix (nucleoside diphosphate linked moiety X)-type motif 21
hsa-miR-31-5p	down	NUMB	numb homolog (Drosophila)
hsa-miR-7150	up	NUMBL	numb homolog (Drosophila)-like
hsa-miR-140-3p	down	NUP188	nucleoporin 188kDa
hsa-miR-15a-5p	down	NUP50	nucleoporin 50kDa
hsa-miR-3607-5p	down	NUP98	nucleoporin 98kDa
hsa-miR-6126	up	NXF1	nuclear RNA export factor 1
hsa-miR-22-3p	down	NXT2	nuclear transport factor 2-like export factor 2
hsa-miR-181a-5p	down	OGT	O-linked N-acetylglucosamine (GlcNAc) transferase (UDP-N-acetylglucosamine:polypeptide-N-acetylglucosaminyl transferase)
hsa-miR-15a-5p	down	OGT	O-linked N-acetylglucosamine (GlcNAc) transferase (UDP-N-acetylglucosamine:polypeptide-N-acetylglucosaminyl transferase)
hsa-miR-101-3p	down	OGT	O-linked N-acetylglucosamine (GlcNAc) transferase (UDP-N-acetylglucosamine:polypeptide-N-acetylglucosaminyl transferase)
hsa-miR-4734	down	OPRL1	opiate receptor-like 1
hsa-miR-98-5p	up	OPRM1	opioid receptor, mu 1
hsa-miR-5787	up	ORAI2	ORAI calcium release-activated calcium modulator 2
hsa-miR-4505	up	ORAI2	ORAI calcium release-activated calcium modulator 2
hsa-miR-6791-5p	up	ORAI3	ORAI calcium release-activated calcium modulator 3
hsa-miR-98-5p	up	OSMR	oncostatin M receptor
hsa-miR-5787	up	P2RX1	purinergic receptor P2X, ligand-gated ion channel, 1
hsa-miR-98-5p	up	P2RX1	purinergic receptor P2X, ligand-gated ion channel, 1
hsa-miR-6791-5p	up	P2RX6	purinergic receptor P2X, ligand-gated ion channel, 6
hsa-miR-550a-5p	down	P2RY14	purinergic receptor P2Y, G-protein coupled, 14
hsa-miR-140-3p	down	P2RY2	purinergic receptor P2Y, G-protein coupled, 2
hsa-miR-30e-5p	down	PAFAH1B2	platelet-activating factor acetylhydrolase 1b, catalytic subunit 2 (30kDa)
hsa-miR-22-3p	down	PAFAH1B2	platelet-activating factor acetylhydrolase 1b, catalytic subunit 2 (30kDa)
hsa-miR-140-3p	down	PAFAH1B2	platelet-activating factor acetylhydrolase 1b, catalytic subunit 2 (30kDa)
hsa-miR-98-5p	up	PAK1	p21 protein (Cdc42/Rac)-activated kinase 1
hsa-miR-140-3p	down	PAK2	p21 protein (Cdc42/Rac)-activated kinase 2
hsa-miR-155-5p	up	PAK2	p21 protein (Cdc42/Rac)-activated kinase 2
hsa-miR-15a-5p	down	PAK7	p21 protein (Cdc42/Rac)-activated kinase 7
hsa-miR-181a-5p	down	PAN3	PAN3 poly(A) specific ribonuclease subunit homolog (S. cerevisiae)
hsa-miR-194-5p	down	PAN3	PAN3 poly(A) specific ribonuclease subunit homolog (S. cerevisiae)
hsa-miR-101-3p	down	PANK3	pantothenate kinase 3
hsa-miR-7641	up	PAPOLA	poly(A) polymerase alpha
hsa-miR-1273g-3p	up	PAPOLG	poly(A) polymerase gamma
hsa-miR-4447	up	PAPOLG	poly(A) polymerase gamma
hsa-miR-6779-5p	up	PAPOLG	poly(A) polymerase gamma
hsa-miR-4472	up	PAPOLG	poly(A) polymerase gamma
hsa-miR-140-3p	down	PAPSS2	3'-phosphoadenosine 5'-phosphosulfate synthase 2
hsa-miR-98-5p	up	PARD6B	par-6 partitioning defective 6 homolog beta (C. elegans)
hsa-miR-5096	up	PARD6G	par-6 partitioning defective 6 homolog gamma (C. elegans)
hsa-miR-181a-5p	down	PARK2	parkinson protein 2, E3 ubiquitin protein ligase (parkin)
hsa-miR-181c-5p	down	PARK2	parkinson protein 2, E3 ubiquitin protein ligase (parkin)
hsa-miR-6779-5p	up	PARVA	parvin, alpha
hsa-miR-550a-5p	down	PARVA	parvin, alpha
hsa-miR-5787	up	PAX5	paired box 5
hsa-miR-4505	up	PAX5	paired box 5
hsa-miR-3620-5p	up	PAX5	paired box 5
hsa-miR-4492	up	PAX5	paired box 5
hsa-miR-15a-5p	down	PAX7	paired box 7
hsa-miR-5787	up	PAX7	paired box 7
hsa-miR-4472	up	PAX7	paired box 7
hsa-miR-4505	up	PAX7	paired box 7
hsa-miR-3620-5p	up	PAX7	paired box 7
hsa-miR-30c-1-3p	up	PAX7	paired box 7
hsa-miR-6791-5p	up	PAX8	paired box 8
hsa-miR-550a-5p	down	PAX8	paired box 8
hsa-miR-98-5p	up	PBX1	pre-B-cell leukemia homeobox 1
hsa-miR-6073	up	PBX1	pre-B-cell leukemia homeobox 1
hsa-miR-30c-1-3p	up	PBX1	pre-B-cell leukemia homeobox 1
hsa-miR-101-3p	down	PBX3	pre-B-cell leukemia homeobox 3
hsa-miR-98-5p	up	PBX3	pre-B-cell leukemia homeobox 3
hsa-miR-22-3p	down	PCLO	piccolo (presynaptic cytomatrix protein)
hsa-miR-6791-5p	up	PCYT1B	phosphate cytidylyltransferase 1, choline, beta
hsa-miR-15a-5p	down	PDCD4	programmed cell death 4 (neoplastic transformation inhibitor)
hsa-miR-1273g-3p	up	PDE11A	phosphodiesterase 11A
hsa-miR-4472	up	PDE1B	phosphodiesterase 1B, calmodulin-dependent
hsa-miR-101-3p	down	PDE4A	phosphodiesterase 4A, cAMP-specific
hsa-miR-7150	up	PDE4B	phosphodiesterase 4B, cAMP-specific
hsa-miR-5787	up	PDE4D	phosphodiesterase 4D, cAMP-specific
hsa-miR-101-3p	down	PDE4D	phosphodiesterase 4D, cAMP-specific
hsa-miR-148b-3p	down	PDE4D	phosphodiesterase 4D, cAMP-specific
hsa-miR-148a-3p	down	PDE4D	phosphodiesterase 4D, cAMP-specific
hsa-miR-6791-5p	up	PDE4D	phosphodiesterase 4D, cAMP-specific
hsa-miR-4505	up	PDE4D	phosphodiesterase 4D, cAMP-specific
hsa-miR-3620-5p	up	PDE4D	phosphodiesterase 4D, cAMP-specific
hsa-miR-4492	up	PDE4D	phosphodiesterase 4D, cAMP-specific
hsa-miR-30e-5p	down	PDE7A	phosphodiesterase 7A
hsa-miR-4687-3p	up	PDE7A	phosphodiesterase 7A
hsa-miR-4301	up	PDE7B	phosphodiesterase 7B
hsa-miR-181a-5p	down	PDGFRA	platelet-derived growth factor receptor, alpha polypeptide
hsa-miR-3609	down	PDGFRA	platelet-derived growth factor receptor, alpha polypeptide
hsa-miR-550a-5p	down	PDGFRA	platelet-derived growth factor receptor, alpha polypeptide
hsa-miR-148a-3p	down	PDIA3	protein disulfide isomerase family A, member 3
hsa-miR-181a-5p	down	PDPK1	3-phosphoinositide dependent protein kinase-1
hsa-miR-5787	up	PDPK1	3-phosphoinositide dependent protein kinase-1
hsa-miR-31-5p	down	PDPK1	3-phosphoinositide dependent protein kinase-1
hsa-miR-7150	up	PDPK1	3-phosphoinositide dependent protein kinase-1
hsa-miR-6779-5p	up	PDXP	pyridoxal (pyridoxine, vitamin B6) phosphatase
hsa-miR-4505	up	PDXP	pyridoxal (pyridoxine, vitamin B6) phosphatase
hsa-miR-423-5p	down	PER1	period homolog 1 (Drosophila)
hsa-miR-3620-5p	up	PFKFB2	6-phosphofructo-2-kinase/fructose-2,6-biphosphatase 2
hsa-miR-7150	up	PFKFB2	6-phosphofructo-2-kinase/fructose-2,6-biphosphatase 2
hsa-miR-15a-5p	down	PFKFB4	6-phosphofructo-2-kinase/fructose-2,6-biphosphatase 4
hsa-miR-4492	up	PFKFB4	6-phosphofructo-2-kinase/fructose-2,6-biphosphatase 4
hsa-miR-181a-5p	down	PGAP1	post-GPI attachment to proteins 1
hsa-miR-6791-5p	up	PGP	phosphoglycolate phosphatase
hsa-miR-181a-5p	down	PGR	progesterone receptor
hsa-miR-5096	up	PGR	progesterone receptor
hsa-miR-4492	up	PHKG2	phosphorylase kinase, gamma 2 (testis)
hsa-miR-5787	up	PHOSPHO1	phosphatase, orphan 1
hsa-miR-4505	up	PHOSPHO1	phosphatase, orphan 1
hsa-miR-181a-5p	down	PI4K2A	phosphatidylinositol 4-kinase type 2 alpha
hsa-miR-148b-3p	down	PI4KA	phosphatidylinositol 4-kinase, catalytic, alpha
hsa-miR-148a-3p	down	PI4KA	phosphatidylinositol 4-kinase, catalytic, alpha
hsa-miR-140-3p	down	PI4KB	phosphatidylinositol 4-kinase, catalytic, beta
hsa-miR-6791-5p	up	PI4KB	phosphatidylinositol 4-kinase, catalytic, beta
hsa-miR-30e-5p	down	PIGA	phosphatidylinositol glycan anchor biosynthesis, class A
hsa-miR-361-5p	down	PIGA	phosphatidylinositol glycan anchor biosynthesis, class A
hsa-miR-98-5p	up	PIGA	phosphatidylinositol glycan anchor biosynthesis, class A
hsa-miR-3609	down	PIGG	phosphatidylinositol glycan anchor biosynthesis, class G
hsa-miR-22-3p	down	PIGN	phosphatidylinositol glycan anchor biosynthesis, class N
hsa-miR-181a-5p	down	PIK3C2A	phosphoinositide-3-kinase, class 2, alpha polypeptide
hsa-miR-31-5p	down	PIK3C2A	phosphoinositide-3-kinase, class 2, alpha polypeptide
hsa-miR-181c-5p	down	PIK3C2A	phosphoinositide-3-kinase, class 2, alpha polypeptide
hsa-miR-155-5p	up	PIK3R1	phosphoinositide-3-kinase, regulatory subunit 1 (alpha)
hsa-miR-181a-5p	down	PIK3R3	phosphoinositide-3-kinase, regulatory subunit 3 (gamma)
hsa-miR-181c-5p	down	PIK3R3	phosphoinositide-3-kinase, regulatory subunit 3 (gamma)
hsa-miR-3620-5p	up	PIM2	pim-2 oncogene
hsa-miR-181a-5p	down	PIP4K2B	phosphatidylinositol-5-phosphate 4-kinase, type II, beta
hsa-miR-22-3p	down	PIP4K2B	phosphatidylinositol-5-phosphate 4-kinase, type II, beta
hsa-miR-140-3p	down	PIP4K2B	phosphatidylinositol-5-phosphate 4-kinase, type II, beta
hsa-miR-6779-5p	up	PIP4K2B	phosphatidylinositol-5-phosphate 4-kinase, type II, beta
hsa-miR-181c-5p	down	PIP4K2B	phosphatidylinositol-5-phosphate 4-kinase, type II, beta
hsa-miR-6803-5p	up	PIP4K2C	phosphatidylinositol-5-phosphate 4-kinase, type II, gamma
hsa-miR-30c-1-3p	up	PIP4K2C	phosphatidylinositol-5-phosphate 4-kinase, type II, gamma
hsa-miR-3620-5p	up	PKP2	plakophilin 2
hsa-miR-15a-5p	down	PLA2G15	phospholipase A2, group XV
hsa-miR-6791-5p	up	PLA2G5	phospholipase A2, group V
hsa-miR-7150	up	PLCB3	phospholipase C, beta 3 (phosphatidylinositol-specific)
hsa-miR-15a-5p	down	PLCD1	phospholipase C, delta 1
hsa-miR-5787	up	PLCD3	phospholipase C, delta 3
hsa-miR-4505	up	PLCD3	phospholipase C, delta 3
hsa-miR-4492	up	PLCD3	phospholipase C, delta 3
hsa-miR-5787	up	PLCG1	phospholipase C, gamma 1
hsa-miR-4505	up	PLCG1	phospholipase C, gamma 1
hsa-miR-7150	up	PLCG1	phospholipase C, gamma 1
hsa-miR-4492	up	PLD2	phospholipase D2
hsa-miR-6791-5p	up	PLEKHO2	pleckstrin homology domain containing, family O member 2
hsa-miR-4505	up	PLEKHO2	pleckstrin homology domain containing, family O member 2
hsa-miR-6791-5p	up	PLK3	polo-like kinase 3
hsa-miR-6791-5p	up	PLOD1	procollagen-lysine, 2-oxoglutarate 5-dioxygenase 1
hsa-miR-1273g-3p	up	PLXNA1	plexin A1
hsa-miR-4492	up	PLXNA1	plexin A1
hsa-miR-5787	up	PLXNA2	plexin A2
hsa-miR-4447	up	PLXNA3	plexin A3
hsa-miR-4472	up	PLXNA3	plexin A3
hsa-miR-15a-5p	down	PLXNB1	plexin B1
hsa-miR-98-5p	up	PLXNC1	plexin C1
hsa-miR-15a-5p	down	PMM1	phosphomannomutase 1
hsa-miR-5787	up	PMM1	phosphomannomutase 1
hsa-miR-148b-3p	down	PNPLA6	patatin-like phospholipase domain containing 6
hsa-miR-148a-3p	down	PNPLA6	patatin-like phospholipase domain containing 6
hsa-miR-550a-5p	down	POFUT1	protein O-fucosyltransferase 1
hsa-miR-98-5p	up	POLR2D	polymerase (RNA) II (DNA directed) polypeptide D
hsa-miR-6803-5p	up	POLR2F	polymerase (RNA) II (DNA directed) polypeptide F
hsa-miR-15a-5p	down	POM121	POM121 transmembrane nucleoporin
hsa-miR-15a-5p	down	POM121C	POM121 transmembrane nucleoporin C
hsa-miR-425-5p	down	POMT2	protein-O-mannosyltransferase 2
hsa-miR-15a-5p	down	POP4	processing of precursor 4, ribonuclease P/MRP subunit (S. cerevisiae)
hsa-miR-15a-5p	down	PPAP2A	phosphatidic acid phosphatase type 2A
hsa-miR-181a-5p	down	PPARA	peroxisome proliferator-activated receptor alpha
hsa-miR-22-3p	down	PPARA	peroxisome proliferator-activated receptor alpha
hsa-miR-181c-5p	down	PPARA	peroxisome proliferator-activated receptor alpha
hsa-miR-550a-5p	down	PPARA	peroxisome proliferator-activated receptor alpha
hsa-miR-7150	up	PPARGC1A	peroxisome proliferator-activated receptor gamma, coactivator 1 alpha
hsa-miR-15a-5p	down	PPM1A	protein phosphatase, Mg2+/Mn2+ dependent, 1A
hsa-miR-15a-5p	down	PPM1D	protein phosphatase, Mg2+/Mn2+ dependent, 1D
hsa-miR-6791-5p	up	PPP1CA	protein phosphatase 1, catalytic subunit, alpha isozyme
hsa-miR-5787	up	PPP1CB	protein phosphatase 1, catalytic subunit, beta isozyme
hsa-miR-5096	up	PPP1CC	protein phosphatase 1, catalytic subunit, gamma isozyme
hsa-miR-98-5p	up	PPP1R12B	protein phosphatase 1, regulatory subunit 12B
hsa-miR-181a-5p	down	PPP1R3B	protein phosphatase 1, regulatory subunit 3B
hsa-miR-22-3p	down	PPP1R3B	protein phosphatase 1, regulatory subunit 3B
hsa-miR-5787	up	PPP1R3B	protein phosphatase 1, regulatory subunit 3B
hsa-miR-4505	up	PPP1R3B	protein phosphatase 1, regulatory subunit 3B
hsa-miR-4687-3p	up	PPP2CA	protein phosphatase 2, catalytic subunit, alpha isozyme
hsa-miR-5787	up	PPP2R1A	protein phosphatase 2, regulatory subunit A, alpha
hsa-miR-1275	up	PPP2R1A	protein phosphatase 2, regulatory subunit A, alpha
hsa-miR-15a-5p	down	PPP2R1B	protein phosphatase 2, regulatory subunit A, beta
hsa-miR-31-5p	down	PPP2R2A	protein phosphatase 2, regulatory subunit B, alpha
hsa-miR-3609	down	PPP2R3A	protein phosphatase 2, regulatory subunit B'', alpha
hsa-miR-181a-5p	down	PPP2R5E	protein phosphatase 2, regulatory subunit B', epsilon isoform
hsa-miR-181c-5p	down	PPP2R5E	protein phosphatase 2, regulatory subunit B', epsilon isoform
hsa-miR-6073	up	PPP3CA	protein phosphatase 3, catalytic subunit, alpha isozyme
hsa-miR-181a-5p	down	PPP3R1	protein phosphatase 3, regulatory subunit B, alpha
hsa-miR-6791-5p	up	PPP5C	protein phosphatase 5, catalytic subunit
hsa-miR-1275	up	PPT2	palmitoyl-protein thioesterase 2
hsa-miR-5787	up	PRCC	papillary renal cell carcinoma (translocation-associated)
hsa-miR-181a-5p	down	PRICKLE2	prickle homolog 2 (Drosophila)
hsa-miR-361-5p	down	PRICKLE2	prickle homolog 2 (Drosophila)
hsa-miR-148b-3p	down	PRKAA1	protein kinase, AMP-activated, alpha 1 catalytic subunit
hsa-miR-3609	down	PRKAA2	protein kinase, AMP-activated, alpha 2 catalytic subunit
hsa-miR-15a-5p	down	PRKAB2	protein kinase, AMP-activated, beta 2 non-catalytic subunit
hsa-miR-98-5p	up	PRKAB2	protein kinase, AMP-activated, beta 2 non-catalytic subunit
hsa-miR-6779-5p	up	PRKACA	protein kinase, cAMP-dependent, catalytic, alpha
hsa-miR-7150	up	PRKACA	protein kinase, cAMP-dependent, catalytic, alpha
hsa-miR-181a-5p	down	PRKAG2	protein kinase, AMP-activated, gamma 2 non-catalytic subunit
hsa-miR-181c-5p	down	PRKAG2	protein kinase, AMP-activated, gamma 2 non-catalytic subunit
hsa-miR-194-5p	down	PRKAR1A	protein kinase, cAMP-dependent, regulatory, type I, alpha (tissue specific extinguisher 1)
hsa-miR-3609	down	PRKAR2B	protein kinase, cAMP-dependent, regulatory, type II, beta
hsa-miR-1273g-3p	up	PRKCA	protein kinase C, alpha
hsa-miR-4687-3p	up	PRKCA	protein kinase C, alpha
hsa-miR-3609	down	PRKCB	protein kinase C, beta
hsa-miR-15a-5p	down	PRKCD	protein kinase C, delta
hsa-miR-181c-5p	down	PRKG1	protein kinase, cGMP-dependent, type I
hsa-miR-181a-5p	down	PRLR	prolactin receptor
hsa-miR-30e-5p	down	PRLR	prolactin receptor
hsa-miR-15a-5p	down	PRLR	prolactin receptor
hsa-miR-30d-5p	down	PRLR	prolactin receptor
hsa-miR-31-5p	down	PRLR	prolactin receptor
hsa-miR-98-5p	up	PRLR	prolactin receptor
hsa-miR-181c-5p	down	PRLR	prolactin receptor
hsa-miR-30e-5p	down	PSD3	pleckstrin and Sec7 domain containing 3
hsa-miR-1246	up	PSD3	pleckstrin and Sec7 domain containing 3
hsa-miR-15a-5p	down	PSMD7	proteasome (prosome, macropain) 26S subunit, non-ATPase, 7
hsa-miR-550a-5p	down	PSME1	proteasome (prosome, macropain) activator subunit 1 (PA28 alpha)
hsa-miR-30d-5p	down	PSME3	proteasome (prosome, macropain) activator subunit 3 (PA28 gamma; Ki)
hsa-miR-15a-5p	down	PTCH1	patched 1
hsa-miR-101-3p	down	PTCH1	patched 1
hsa-miR-140-3p	down	PTCH1	patched 1
hsa-miR-425-5p	down	PTCH1	patched 1
hsa-miR-1273g-3p	up	PTEN	phosphatase and tensin homolog
hsa-miR-140-3p	down	PTEN	phosphatase and tensin homolog
hsa-miR-148b-3p	down	PTEN	phosphatase and tensin homolog
hsa-miR-148b-3p	down	PTGES3	prostaglandin E synthase 3 (cytosolic)
hsa-miR-148a-3p	down	PTGES3	prostaglandin E synthase 3 (cytosolic)
hsa-miR-6803-5p	up	PTGIS	prostaglandin I2 (prostacyclin) synthase
hsa-miR-6791-5p	up	PTGIS	prostaglandin I2 (prostacyclin) synthase
hsa-miR-22-3p	down	PTGS1	prostaglandin-endoperoxide synthase 1 (prostaglandin G/H synthase and cyclooxygenase)
hsa-miR-148b-3p	down	PTGS1	prostaglandin-endoperoxide synthase 1 (prostaglandin G/H synthase and cyclooxygenase)
hsa-miR-148a-3p	down	PTGS1	prostaglandin-endoperoxide synthase 1 (prostaglandin G/H synthase and cyclooxygenase)
hsa-miR-140-3p	down	PTPN1	protein tyrosine phosphatase, non-receptor type 1
hsa-miR-15a-5p	down	PTPRR	protein tyrosine phosphatase, receptor type, R
hsa-miR-15a-5p	down	PVRL1	poliovirus receptor-related 1 (herpesvirus entry mediator C)
hsa-miR-5787	up	PVRL1	poliovirus receptor-related 1 (herpesvirus entry mediator C)
hsa-miR-4472	up	PVRL1	poliovirus receptor-related 1 (herpesvirus entry mediator C)
hsa-miR-4505	up	PVRL1	poliovirus receptor-related 1 (herpesvirus entry mediator C)
hsa-miR-15a-5p	down	RAB11FIP2	RAB11 family interacting protein 2 (class I)
hsa-miR-98-5p	up	RAB11FIP4	RAB11 family interacting protein 4 (class II)
hsa-miR-5787	up	RAB11FIP5	RAB11 family interacting protein 5 (class I)
hsa-miR-6791-5p	up	RAB11FIP5	RAB11 family interacting protein 5 (class I)
hsa-miR-4505	up	RAB11FIP5	RAB11 family interacting protein 5 (class I)
hsa-miR-5096	up	RAB22A	RAB22A, member RAS oncogene family
hsa-miR-6791-5p	up	RAB3D	RAB3D, member RAS oncogene family
hsa-miR-22-3p	down	RAB5B	RAB5B, member RAS oncogene family
hsa-miR-5787	up	RAB5B	RAB5B, member RAS oncogene family
hsa-miR-4505	up	RAB5B	RAB5B, member RAS oncogene family
hsa-miR-30c-1-3p	up	RAB5B	RAB5B, member RAS oncogene family
hsa-miR-3609	down	RAB5C	RAB5C, member RAS oncogene family
hsa-miR-3620-5p	up	RAB8A	RAB8A, member RAS oncogene family
hsa-miR-15a-5p	down	RAB9A	RAB9A, member RAS oncogene family
hsa-miR-181a-5p	down	RAD21	RAD21 homolog (S. pombe)
hsa-miR-361-5p	down	RAD23B	RAD23 homolog B (S. cerevisiae)
hsa-miR-98-5p	up	RALB	v-ral simian leukemia viral oncogene homolog B (ras related; GTP binding protein)
hsa-miR-6779-5p	up	RALB	v-ral simian leukemia viral oncogene homolog B (ras related; GTP binding protein)
hsa-miR-4687-3p	up	RALBP1	ralA binding protein 1
hsa-miR-3609	down	RANBP2	RAN binding protein 2
hsa-miR-15a-5p	down	RAPGEF1	Rap guanine nucleotide exchange factor (GEF) 1
hsa-miR-3609	down	RAPGEF1	Rap guanine nucleotide exchange factor (GEF) 1
hsa-miR-194-5p	down	RARA	retinoic acid receptor, alpha
hsa-miR-4734	down	RARA	retinoic acid receptor, alpha
hsa-miR-4492	up	RARA	retinoic acid receptor, alpha
hsa-miR-30e-5p	down	RARB	retinoic acid receptor, beta
hsa-miR-30d-5p	down	RARB	retinoic acid receptor, beta
hsa-miR-30e-5p	down	RASA1	RAS p21 protein activator (GTPase activating protein) 1
hsa-miR-30d-5p	down	RASA1	RAS p21 protein activator (GTPase activating protein) 1
hsa-miR-30e-5p	down	RASD1	RAS, dexamethasone-induced 1
hsa-miR-5787	up	RASGRF1	Ras protein-specific guanine nucleotide-releasing factor 1
hsa-miR-6779-5p	up	RASGRF1	Ras protein-specific guanine nucleotide-releasing factor 1
hsa-miR-4505	up	RASGRF1	Ras protein-specific guanine nucleotide-releasing factor 1
hsa-miR-3620-5p	up	RASGRF1	Ras protein-specific guanine nucleotide-releasing factor 1
hsa-miR-4492	up	RASGRF1	Ras protein-specific guanine nucleotide-releasing factor 1
hsa-miR-98-5p	up	RASGRP1	RAS guanyl releasing protein 1 (calcium and DAG-regulated)
hsa-miR-30e-5p	down	RASGRP3	RAS guanyl releasing protein 3 (calcium and DAG-regulated)
hsa-miR-5096	up	RASGRP3	RAS guanyl releasing protein 3 (calcium and DAG-regulated)
hsa-miR-30d-5p	down	RASGRP3	RAS guanyl releasing protein 3 (calcium and DAG-regulated)
hsa-miR-181a-5p	down	RASSF1	Ras association (RalGDS/AF-6) domain family member 1
hsa-miR-15a-5p	down	RASSF5	Ras association (RalGDS/AF-6) domain family member 5
hsa-miR-3609	down	RB1	retinoblastoma 1
hsa-miR-31-5p	down	RBM8A	RNA binding motif protein 8A
hsa-miR-361-5p	down	RCHY1	ring finger and CHY zinc finger domain containing 1, E3 ubiquitin protein ligase
hsa-miR-7150	up	RCVRN	recoverin
hsa-miR-98-5p	up	RDH10	retinol dehydrogenase 10 (all-trans)
hsa-miR-98-5p	up	RDX	radixin
hsa-miR-15a-5p	down	RELT	RELT tumor necrosis factor receptor
hsa-miR-140-3p	down	RELT	RELT tumor necrosis factor receptor
hsa-miR-6779-5p	up	RELT	RELT tumor necrosis factor receptor
hsa-miR-101-3p	down	REV3L	REV3-like, catalytic subunit of DNA polymerase zeta (yeast)
hsa-miR-22-3p	down	RFXANK	regulatory factor X-associated ankyrin-containing protein
hsa-miR-194-5p	down	RHEB	Ras homolog enriched in brain
hsa-miR-5787	up	RHO	rhodopsin
hsa-miR-6803-5p	up	RHOG	ras homolog family member G
hsa-miR-5096	up	RICTOR	RPTOR independent companion of MTOR, complex 2
hsa-miR-148b-3p	down	RICTOR	RPTOR independent companion of MTOR, complex 2
hsa-miR-148a-3p	down	RICTOR	RPTOR independent companion of MTOR, complex 2
hsa-miR-181a-5p	down	RNF125	ring finger protein 125, E3 ubiquitin protein ligase
hsa-miR-15a-5p	down	RNF125	ring finger protein 125, E3 ubiquitin protein ligase
hsa-miR-3620-5p	up	RNF41	ring finger protein 41
hsa-miR-140-3p	down	RNF7	ring finger protein 7
hsa-miR-98-5p	up	RNF7	ring finger protein 7
hsa-miR-181a-5p	down	RNMT	RNA (guanine-7-) methyltransferase
hsa-miR-98-5p	up	RNMT	RNA (guanine-7-) methyltransferase
hsa-miR-181c-5p	down	RNMT	RNA (guanine-7-) methyltransferase
hsa-miR-148b-3p	down	ROBO1	roundabout, axon guidance receptor, homolog 1 (Drosophila)
hsa-miR-148a-3p	down	ROBO1	roundabout, axon guidance receptor, homolog 1 (Drosophila)
hsa-miR-101-3p	down	ROBO2	roundabout, axon guidance receptor, homolog 2 (Drosophila)
hsa-miR-140-3p	down	ROBO2	roundabout, axon guidance receptor, homolog 2 (Drosophila)
hsa-miR-148b-3p	down	ROCK1	Rho-associated, coiled-coil containing protein kinase 1
hsa-miR-148a-3p	down	ROCK1	Rho-associated, coiled-coil containing protein kinase 1
hsa-miR-181a-5p	down	RORA	RAR-related orphan receptor A
hsa-miR-5096	up	RORA	RAR-related orphan receptor A
hsa-miR-15a-5p	down	RORA	RAR-related orphan receptor A
hsa-miR-3609	down	RORA	RAR-related orphan receptor A
hsa-miR-31-5p	down	RORC	RAR-related orphan receptor C
hsa-miR-30e-5p	down	RPS6KA2	ribosomal protein S6 kinase, 90kDa, polypeptide 2
hsa-miR-181a-5p	down	RPS6KA3	ribosomal protein S6 kinase, 90kDa, polypeptide 3
hsa-miR-15a-5p	down	RPS6KA3	ribosomal protein S6 kinase, 90kDa, polypeptide 3
hsa-miR-98-5p	up	RPS6KA3	ribosomal protein S6 kinase, 90kDa, polypeptide 3
hsa-miR-181c-5p	down	RPS6KA3	ribosomal protein S6 kinase, 90kDa, polypeptide 3
hsa-miR-30c-1-3p	up	RPS6KA3	ribosomal protein S6 kinase, 90kDa, polypeptide 3
hsa-miR-98-5p	up	RRAGD	Ras-related GTP binding D
hsa-miR-3609	down	RRAGD	Ras-related GTP binding D
hsa-miR-98-5p	up	RRM2	ribonucleotide reductase M2
hsa-miR-30e-5p	down	RUNX1	runt-related transcription factor 1
hsa-miR-550a-5p	down	RUNX2	runt-related transcription factor 2
hsa-miR-22-3p	down	RXFP2	relaxin/insulin-like family peptide receptor 2
hsa-miR-5096	up	RXRA	retinoid X receptor, alpha
hsa-miR-101-3p	down	RXRB	retinoid X receptor, beta
hsa-miR-148b-3p	down	S1PR1	sphingosine-1-phosphate receptor 1
hsa-miR-148a-3p	down	S1PR1	sphingosine-1-phosphate receptor 1
hsa-miR-7150	up	S1PR2	sphingosine-1-phosphate receptor 2
hsa-miR-140-3p	down	SAR1A	SAR1 homolog A (S. cerevisiae)
hsa-miR-140-3p	down	SCN1A	sodium channel, voltage-gated, type I, alpha subunit
hsa-miR-5787	up	SCNN1G	sodium channel, non-voltage-gated 1, gamma subunit
hsa-miR-5787	up	SDC3	syndecan 3
hsa-miR-3620-5p	up	SDC3	syndecan 3
hsa-miR-4492	up	SDC3	syndecan 3
hsa-miR-194-5p	down	SDC4	syndecan 4
hsa-miR-30e-5p	down	SEC23A	Sec23 homolog A (S. cerevisiae)
hsa-miR-181a-5p	down	SEC24C	SEC24 family, member C (S. cerevisiae)
hsa-miR-181c-5p	down	SEC24C	SEC24 family, member C (S. cerevisiae)
hsa-miR-15a-5p	down	SEH1L	SEH1-like (S. cerevisiae)
hsa-miR-181a-5p	down	SEL1L	sel-1 suppressor of lin-12-like (C. elegans)
hsa-miR-30e-5p	down	SEMA3A	sema domain, immunoglobulin domain (Ig), short basic domain, secreted, (semaphorin) 3A
hsa-miR-15a-5p	down	SEMA3A	sema domain, immunoglobulin domain (Ig), short basic domain, secreted, (semaphorin) 3A
hsa-miR-30d-5p	down	SEMA3A	sema domain, immunoglobulin domain (Ig), short basic domain, secreted, (semaphorin) 3A
hsa-miR-3607-5p	down	SEMA3D	sema domain, immunoglobulin domain (Ig), short basic domain, secreted, (semaphorin) 3D
hsa-miR-4505	up	SEMA3G	sema domain, immunoglobulin domain (Ig), short basic domain, secreted, (semaphorin) 3G
hsa-miR-181a-5p	down	SEMA4C	sema domain, immunoglobulin domain (Ig), transmembrane domain (TM) and short cytoplasmic domain, (semaphorin) 4C
hsa-miR-550a-5p	down	SEMA4C	sema domain, immunoglobulin domain (Ig), transmembrane domain (TM) and short cytoplasmic domain, (semaphorin) 4C
hsa-miR-22-3p	down	SEMA4F	sema domain, immunoglobulin domain (Ig), transmembrane domain (TM) and short cytoplasmic domain, (semaphorin) 4F
hsa-miR-98-5p	up	SEMA4F	sema domain, immunoglobulin domain (Ig), transmembrane domain (TM) and short cytoplasmic domain, (semaphorin) 4F
hsa-miR-5787	up	SEMA4G	sema domain, immunoglobulin domain (Ig), transmembrane domain (TM) and short cytoplasmic domain, (semaphorin) 4G
hsa-miR-98-5p	up	SEMA4G	sema domain, immunoglobulin domain (Ig), transmembrane domain (TM) and short cytoplasmic domain, (semaphorin) 4G
hsa-miR-30c-1-3p	up	SEMA4G	sema domain, immunoglobulin domain (Ig), transmembrane domain (TM) and short cytoplasmic domain, (semaphorin) 4G
hsa-miR-5096	up	SEMA5A	sema domain, seven thrombospondin repeats (type 1 and type 1-like), transmembrane domain (TM) and short cytoplasmic domain, (semaphorin) 5A
hsa-miR-3609	down	SEMA5A	sema domain, seven thrombospondin repeats (type 1 and type 1-like), transmembrane domain (TM) and short cytoplasmic domain, (semaphorin) 5A
hsa-miR-155-5p	up	SEMA5A	sema domain, seven thrombospondin repeats (type 1 and type 1-like), transmembrane domain (TM) and short cytoplasmic domain, (semaphorin) 5A
hsa-miR-15a-5p	down	SEMA5B	sema domain, seven thrombospondin repeats (type 1 and type 1-like), transmembrane domain (TM) and short cytoplasmic domain, (semaphorin) 5B
hsa-miR-3620-5p	up	SEMA5B	sema domain, seven thrombospondin repeats (type 1 and type 1-like), transmembrane domain (TM) and short cytoplasmic domain, (semaphorin) 5B
hsa-miR-1246	up	SEMA6A	sema domain, transmembrane domain (TM), and cytoplasmic domain, (semaphorin) 6A
hsa-miR-6791-5p	up	SEMA6B	sema domain, transmembrane domain (TM), and cytoplasmic domain, (semaphorin) 6B
hsa-miR-15a-5p	down	SEMA6D	sema domain, transmembrane domain (TM), and cytoplasmic domain, (semaphorin) 6D
hsa-miR-31-5p	down	SEMA6D	sema domain, transmembrane domain (TM), and cytoplasmic domain, (semaphorin) 6D
hsa-miR-6791-5p	up	SEMA7A	semaphorin 7A, GPI membrane anchor (John Milton Hagen blood group)
hsa-miR-4484	up	SEPT11	septin 11
hsa-miR-15a-5p	down	SEPT2	septin 2
hsa-miR-4505	up	SEPT3	septin 3
hsa-miR-5787	up	SEPT6	septin 6
hsa-miR-6791-5p	up	SEPT6	septin 6
hsa-miR-6779-5p	up	SEPT6	septin 6
hsa-miR-4505	up	SEPT6	septin 6
hsa-miR-7150	up	SEPT6	septin 6
hsa-miR-181a-5p	down	SEPT8	septin 8
hsa-miR-30c-1-3p	up	SEPT8	septin 8
hsa-miR-181a-5p	down	SERPINE1	serpin peptidase inhibitor, clade E (nexin, plasminogen activator inhibitor type 1), member 1
hsa-miR-181c-5p	down	SERPINE1	serpin peptidase inhibitor, clade E (nexin, plasminogen activator inhibitor type 1), member 1
hsa-miR-15a-5p	down	SESN1	sestrin 1
hsa-miR-6803-5p	up	SESN2	sestrin 2
hsa-miR-148a-3p	down	SESN2	sestrin 2
hsa-miR-5787	up	SETD1A	SET domain containing 1A
hsa-miR-7150	up	SETD1A	SET domain containing 1A
hsa-miR-4301	up	SETD8	SET domain containing (lysine methyltransferase) 8
hsa-miR-4492	up	SFRP5	secreted frizzled-related protein 5
hsa-miR-3609	down	SGCB	sarcoglycan, beta (43kDa dystrophin-associated glycoprotein)
hsa-miR-148a-3p	down	SGCB	sarcoglycan, beta (43kDa dystrophin-associated glycoprotein)
hsa-miR-155-5p	up	SGK3	serum/glucocorticoid regulated kinase family, member 3
hsa-miR-5787	up	SGSH	N-sulfoglucosamine sulfohydrolase
hsa-miR-1273g-3p	up	SH2B3	SH2B adaptor protein 3
hsa-miR-148a-3p	down	SH2B3	SH2B adaptor protein 3
hsa-miR-31-5p	down	SH2D1A	SH2 domain containing 1A
hsa-miR-5787	up	SH3GL1	SH3-domain GRB2-like 1
hsa-miR-15a-5p	down	SH3GL2	SH3-domain GRB2-like 2
hsa-miR-5787	up	SH3KBP1	SH3-domain kinase binding protein 1
hsa-miR-148b-3p	down	SH3KBP1	SH3-domain kinase binding protein 1
hsa-miR-194-5p	down	SHANK2	SH3 and multiple ankyrin repeat domains 2
hsa-miR-3620-5p	up	SHANK2	SH3 and multiple ankyrin repeat domains 2
hsa-miR-4492	up	SHANK2	SH3 and multiple ankyrin repeat domains 2
hsa-miR-30c-1-3p	up	SHANK2	SH3 and multiple ankyrin repeat domains 2
hsa-miR-423-5p	down	SHANK3	SH3 and multiple ankyrin repeat domains 3
hsa-miR-4447	up	SHANK3	SH3 and multiple ankyrin repeat domains 3
hsa-miR-6791-5p	up	SHANK3	SH3 and multiple ankyrin repeat domains 3
hsa-miR-4472	up	SHANK3	SH3 and multiple ankyrin repeat domains 3
hsa-miR-1273g-3p	up	SHC4	SHC (Src homology 2 domain containing) family, member 4
hsa-miR-15a-5p	down	SIAH1	siah E3 ubiquitin protein ligase 1
hsa-miR-5787	up	SIRPA	signal-regulatory protein alpha
hsa-miR-22-3p	down	SIRT1	sirtuin 1
hsa-miR-140-3p	down	SIRT1	sirtuin 1
hsa-miR-30e-5p	down	SIX1	SIX homeobox 1
hsa-miR-30d-5p	down	SIX1	SIX homeobox 1
hsa-miR-181a-5p	down	SIX4	SIX homeobox 4
hsa-miR-101-3p	down	SIX4	SIX homeobox 4
hsa-miR-148b-3p	down	SIX4	SIX homeobox 4
hsa-miR-148a-3p	down	SIX4	SIX homeobox 4
hsa-miR-15a-5p	down	SLC11A2	solute carrier family 11 (proton-coupled divalent metal ion transporters), member 2
hsa-miR-155-5p	up	SLC11A2	solute carrier family 11 (proton-coupled divalent metal ion transporters), member 2
hsa-miR-101-3p	down	SLC12A2	solute carrier family 12 (sodium/potassium/chloride transporters), member 2
hsa-miR-4492	up	SLC12A5	solute carrier family 12 (potassium/chloride transporter), member 5
hsa-miR-6779-5p	up	SLC17A7	solute carrier family 17 (sodium-dependent inorganic phosphate cotransporter), member 7
hsa-miR-30c-1-3p	up	SLC17A7	solute carrier family 17 (sodium-dependent inorganic phosphate cotransporter), member 7
hsa-miR-4687-3p	up	SLC18A2	solute carrier family 18 (vesicular monoamine), member 2
hsa-miR-15a-5p	down	SLC1A2	solute carrier family 1 (glial high affinity glutamate transporter), member 2
hsa-miR-1273g-3p	up	SLC22A7	solute carrier family 22 (organic anion transporter), member 7
hsa-miR-4492	up	SLC22A8	solute carrier family 22 (organic anion transporter), member 8
hsa-miR-4505	up	SLC26A9	solute carrier family 26, member 9
hsa-miR-6779-5p	up	SLC2A4	solute carrier family 2 (facilitated glucose transporter), member 4
hsa-miR-1273g-3p	up	SLC31A1	solute carrier family 31 (copper transporters), member 1
hsa-miR-155-5p	up	SLC33A1	solute carrier family 33 (acetyl-CoA transporter), member 1
hsa-miR-30c-1-3p	up	SLC36A1	solute carrier family 36 (proton/amino acid symporter), member 1
hsa-miR-4505	up	SLC38A1	solute carrier family 38, member 1
hsa-miR-30c-1-3p	up	SLC38A1	solute carrier family 38, member 1
hsa-miR-6791-5p	up	SLC38A5	solute carrier family 38, member 5
hsa-miR-4492	up	SLC38A5	solute carrier family 38, member 5
hsa-miR-6791-5p	up	SLC46A1	solute carrier family 46 (folate transporter), member 1
hsa-miR-3620-5p	up	SLC46A1	solute carrier family 46 (folate transporter), member 1
hsa-miR-140-3p	down	SLC5A1	solute carrier family 5 (sodium/glucose cotransporter), member 1
hsa-miR-15a-5p	down	SLC6A4	solute carrier family 6 (neurotransmitter transporter, serotonin), member 4
hsa-miR-6791-5p	up	SLC8A1	solute carrier family 8 (sodium/calcium exchanger), member 1
hsa-miR-5787	up	SLC8A2	solute carrier family 8 (sodium/calcium exchanger), member 2
hsa-miR-4505	up	SLC8A2	solute carrier family 8 (sodium/calcium exchanger), member 2
hsa-miR-3620-5p	up	SLC8A2	solute carrier family 8 (sodium/calcium exchanger), member 2
hsa-miR-5787	up	SLIT1	slit homolog 1 (Drosophila)
hsa-miR-5787	up	SMAD2	SMAD family member 2
hsa-miR-3609	down	SMAD2	SMAD family member 2
hsa-miR-148b-3p	down	SMAD2	SMAD family member 2
hsa-miR-148a-3p	down	SMAD2	SMAD family member 2
hsa-miR-15a-5p	down	SMAD3	SMAD family member 3
hsa-miR-6779-5p	up	SMAD3	SMAD family member 3
hsa-miR-22-3p	down	SMAD4	SMAD family member 4
hsa-miR-15a-5p	down	SMAD5	SMAD family member 5
hsa-miR-148b-3p	down	SMAD5	SMAD family member 5
hsa-miR-148a-3p	down	SMAD5	SMAD family member 5
hsa-miR-181a-5p	down	SMAD7	SMAD family member 7
hsa-miR-15a-5p	down	SMAD7	SMAD family member 7
hsa-miR-181c-5p	down	SMAD7	SMAD family member 7
hsa-miR-30e-5p	down	SMAP1	small ArfGAP 1
hsa-miR-22-3p	down	SMAP1	small ArfGAP 1
hsa-miR-5096	up	SMAP1	small ArfGAP 1
hsa-miR-4505	up	SMAP2	small ArfGAP2
hsa-miR-98-5p	up	SMC1A	structural maintenance of chromosomes 1A
hsa-miR-30c-1-3p	up	SMC1A	structural maintenance of chromosomes 1A
hsa-miR-550a-5p	down	SMC1A	structural maintenance of chromosomes 1A
hsa-miR-3609	down	SMG1	smg-1 homolog, phosphatidylinositol 3-kinase-related kinase (C. elegans)
hsa-miR-6791-5p	up	SMG1	smg-1 homolog, phosphatidylinositol 3-kinase-related kinase (C. elegans)
hsa-miR-6779-5p	up	SMG6	smg-6 homolog, nonsense mediated mRNA decay factor (C. elegans)
hsa-miR-30c-1-3p	up	SMG6	smg-6 homolog, nonsense mediated mRNA decay factor (C. elegans)
hsa-miR-15a-5p	down	SMPD1	sphingomyelin phosphodiesterase 1, acid lysosomal
hsa-miR-5787	up	SMPD3	sphingomyelin phosphodiesterase 3, neutral membrane (neutral sphingomyelinase II)
hsa-miR-6791-5p	up	SMPD3	sphingomyelin phosphodiesterase 3, neutral membrane (neutral sphingomyelinase II)
hsa-miR-4505	up	SMPD3	sphingomyelin phosphodiesterase 3, neutral membrane (neutral sphingomyelinase II)
hsa-miR-30e-5p	down	SNAI1	snail homolog 1 (Drosophila)
hsa-miR-30d-5p	down	SNAI1	snail homolog 1 (Drosophila)
hsa-miR-181a-5p	down	SOCS4	suppressor of cytokine signaling 4
hsa-miR-98-5p	up	SOCS4	suppressor of cytokine signaling 4
hsa-miR-181c-5p	down	SOCS4	suppressor of cytokine signaling 4
hsa-miR-101-3p	down	SOCS5	suppressor of cytokine signaling 5
hsa-miR-6791-5p	up	SORT1	sortilin 1
hsa-miR-5096	up	SOS1	son of sevenless homolog 1 (Drosophila)
hsa-miR-148b-3p	down	SOS1	son of sevenless homolog 1 (Drosophila)
hsa-miR-15a-5p	down	SOS2	son of sevenless homolog 2 (Drosophila)
hsa-miR-148b-3p	down	SOS2	son of sevenless homolog 2 (Drosophila)
hsa-miR-148a-3p	down	SOS2	son of sevenless homolog 2 (Drosophila)
hsa-miR-5787	up	SP1	Sp1 transcription factor
hsa-miR-4505	up	SP1	Sp1 transcription factor
hsa-miR-7641	up	SP1	Sp1 transcription factor
hsa-miR-550a-5p	down	SP1	Sp1 transcription factor
hsa-miR-155-5p	up	SPI1	spleen focus forming virus (SFFV) proviral integration oncogene spi1
hsa-miR-30c-1-3p	up	SPIRE1	spire homolog 1 (Drosophila)
hsa-miR-181a-5p	down	SPP1	secreted phosphoprotein 1
hsa-miR-181c-5p	down	SPP1	secreted phosphoprotein 1
hsa-miR-15a-5p	down	SPRED1	sprouty-related, EVH1 domain containing 1
hsa-miR-181a-5p	down	SPRY4	sprouty homolog 4 (Drosophila)
hsa-miR-31-5p	down	SPRY4	sprouty homolog 4 (Drosophila)
hsa-miR-6803-5p	up	SPRY4	sprouty homolog 4 (Drosophila)
hsa-miR-6779-5p	up	SPRY4	sprouty homolog 4 (Drosophila)
hsa-miR-30e-5p	down	SPTLC2	serine palmitoyltransferase, long chain base subunit 2
hsa-miR-1273g-3p	up	SPTLC3	serine palmitoyltransferase, long chain base subunit 3
hsa-miR-148b-3p	down	SPTLC3	serine palmitoyltransferase, long chain base subunit 3
hsa-miR-148a-3p	down	SPTLC3	serine palmitoyltransferase, long chain base subunit 3
hsa-miR-5787	up	SRC	v-src sarcoma (Schmidt-Ruppin A-2) viral oncogene homolog (avian)
hsa-miR-31-5p	down	SRC	v-src sarcoma (Schmidt-Ruppin A-2) viral oncogene homolog (avian)
hsa-miR-4505	up	SRC	v-src sarcoma (Schmidt-Ruppin A-2) viral oncogene homolog (avian)
hsa-miR-7150	up	SRC	v-src sarcoma (Schmidt-Ruppin A-2) viral oncogene homolog (avian)
hsa-miR-5096	up	SRF	serum response factor (c-fos serum response element-binding transcription factor)
hsa-miR-423-5p	down	SRF	serum response factor (c-fos serum response element-binding transcription factor)
hsa-miR-4505	up	SRF	serum response factor (c-fos serum response element-binding transcription factor)
hsa-miR-4492	up	SRF	serum response factor (c-fos serum response element-binding transcription factor)
hsa-miR-101-3p	down	SRGAP1	SLIT-ROBO Rho GTPase activating protein 1
hsa-miR-30e-5p	down	SRGAP3	SLIT-ROBO Rho GTPase activating protein 3
hsa-miR-30d-5p	down	SRGAP3	SLIT-ROBO Rho GTPase activating protein 3
hsa-miR-31-5p	down	SRGAP3	SLIT-ROBO Rho GTPase activating protein 3
hsa-miR-98-5p	up	SRGAP3	SLIT-ROBO Rho GTPase activating protein 3
hsa-miR-423-5p	down	SRM	spermidine synthase
hsa-miR-15a-5p	down	SRPK1	SRSF protein kinase 1
hsa-miR-194-5p	down	SS18	synovial sarcoma translocation, chromosome 18
hsa-miR-31-5p	down	SSH1	slingshot homolog 1 (Drosophila)
hsa-miR-98-5p	up	SSH1	slingshot homolog 1 (Drosophila)
hsa-miR-3609	down	SSH2	slingshot homolog 2 (Drosophila)
hsa-miR-7150	up	SSH2	slingshot homolog 2 (Drosophila)
hsa-miR-15a-5p	down	SSR1	signal sequence receptor, alpha
hsa-miR-148b-3p	down	SSR1	signal sequence receptor, alpha
hsa-miR-31-5p	down	ST3GAL2	ST3 beta-galactoside alpha-2,3-sialyltransferase 2
hsa-miR-361-5p	down	ST6GAL2	ST6 beta-galactosamide alpha-2,6-sialyltranferase 2
hsa-miR-7150	up	ST6GALNAC4	ST6 (alpha-N-acetyl-neuraminyl-2,3-beta-galactosyl-1,3)-N-acetylgalactosaminide alpha-2,6-sialyltransferase 4
hsa-miR-423-5p	down	ST6GALNAC6	ST6 (alpha-N-acetyl-neuraminyl-2,3-beta-galactosyl-1,3)-N-acetylgalactosaminide alpha-2,6-sialyltransferase 6
hsa-miR-550a-5p	down	ST6GALNAC6	ST6 (alpha-N-acetyl-neuraminyl-2,3-beta-galactosyl-1,3)-N-acetylgalactosaminide alpha-2,6-sialyltransferase 6
hsa-miR-361-5p	down	ST8SIA1	ST8 alpha-N-acetyl-neuraminide alpha-2,8-sialyltransferase 1
hsa-miR-98-5p	up	ST8SIA1	ST8 alpha-N-acetyl-neuraminide alpha-2,8-sialyltransferase 1
hsa-miR-3609	down	ST8SIA1	ST8 alpha-N-acetyl-neuraminide alpha-2,8-sialyltransferase 1
hsa-miR-7150	up	STAG1	stromal antigen 1
hsa-miR-101-3p	down	STAMBP	STAM binding protein
hsa-miR-140-3p	down	STAMBP	STAM binding protein
hsa-miR-7150	up	STAT2	signal transducer and activator of transcription 2, 113kDa
hsa-miR-5787	up	STAT3	signal transducer and activator of transcription 3 (acute-phase response factor)
hsa-miR-4505	up	STAT3	signal transducer and activator of transcription 3 (acute-phase response factor)
hsa-miR-7150	up	STAT6	signal transducer and activator of transcription 6, interleukin-4 induced
hsa-miR-15a-5p	down	STIM1	stromal interaction molecule 1
hsa-miR-30e-5p	down	STIM2	stromal interaction molecule 2
hsa-miR-101-3p	down	STK4	serine/threonine kinase 4
hsa-miR-550a-5p	down	STK4	serine/threonine kinase 4
hsa-miR-101-3p	down	STMN1	stathmin 1
hsa-miR-5096	up	STX16	syntaxin 16
hsa-miR-98-5p	up	STX17	syntaxin 17
hsa-miR-3620-5p	up	STX17	syntaxin 17
hsa-miR-15a-5p	down	STX1A	syntaxin 1A (brain)
hsa-miR-6803-5p	up	STX1B	syntaxin 1B
hsa-miR-4447	up	STX1B	syntaxin 1B
hsa-miR-1275	up	STX1B	syntaxin 1B
hsa-miR-4472	up	STX1B	syntaxin 1B
hsa-miR-30c-1-3p	up	STX1B	syntaxin 1B
hsa-miR-98-5p	up	STX3	syntaxin 3
hsa-miR-6791-5p	up	STX5	syntaxin 5
hsa-miR-6779-5p	up	STX5	syntaxin 5
hsa-miR-30c-1-3p	up	STX5	syntaxin 5
hsa-miR-15a-5p	down	STXBP1	syntaxin binding protein 1
hsa-miR-5787	up	STXBP1	syntaxin binding protein 1
hsa-miR-4505	up	STXBP1	syntaxin binding protein 1
hsa-miR-4492	up	STXBP1	syntaxin binding protein 1
hsa-miR-30c-1-3p	up	SUCLA2	succinate-CoA ligase, ADP-forming, beta subunit
hsa-miR-5787	up	SUFU	suppressor of fused homolog (Drosophila)
hsa-miR-194-5p	down	SUFU	suppressor of fused homolog (Drosophila)
hsa-miR-423-5p	down	SUFU	suppressor of fused homolog (Drosophila)
hsa-miR-7150	up	SUFU	suppressor of fused homolog (Drosophila)
hsa-miR-194-5p	down	SUMO2	SMT3 suppressor of mif two 3 homolog 2 (S. cerevisiae)
hsa-miR-30d-5p	down	SUPT3H	suppressor of Ty 3 homolog (S. cerevisiae)
hsa-miR-4447	up	SUV39H1	suppressor of variegation 3-9 homolog 1 (Drosophila)
hsa-miR-4472	up	SUV39H1	suppressor of variegation 3-9 homolog 1 (Drosophila)
hsa-miR-6791-5p	up	SUV420H2	suppressor of variegation 4-20 homolog 2 (Drosophila)
hsa-miR-5096	up	SV2A	synaptic vesicle glycoprotein 2A
hsa-miR-550a-5p	down	SV2A	synaptic vesicle glycoprotein 2A
hsa-miR-15a-5p	down	SYNJ1	synaptojanin 1
hsa-miR-4687-3p	up	SYNJ1	synaptojanin 1
hsa-miR-148b-3p	down	SYNJ1	synaptojanin 1
hsa-miR-148a-3p	down	SYNJ1	synaptojanin 1
hsa-miR-15a-5p	down	TAF15	TAF15 RNA polymerase II, TATA box binding protein (TBP)-associated factor, 68kDa
hsa-miR-148b-3p	down	TAF4B	TAF4b RNA polymerase II, TATA box binding protein (TBP)-associated factor, 105kDa
hsa-miR-148a-3p	down	TAF4B	TAF4b RNA polymerase II, TATA box binding protein (TBP)-associated factor, 105kDa
hsa-miR-30c-1-3p	up	TAOK2	TAO kinase 2
hsa-miR-181a-5p	down	TBL1X	transducin (beta)-like 1X-linked
hsa-miR-181a-5p	down	TBL1XR1	transducin (beta)-like 1 X-linked receptor 1
hsa-miR-15a-5p	down	TBL1XR1	transducin (beta)-like 1 X-linked receptor 1
hsa-miR-181c-5p	down	TBL1XR1	transducin (beta)-like 1 X-linked receptor 1
hsa-miR-3620-5p	up	TBL1XR1	transducin (beta)-like 1 X-linked receptor 1
hsa-miR-15a-5p	down	TBP	TATA box binding protein
hsa-miR-15a-5p	down	TBPL1	TBP-like 1
hsa-miR-6779-5p	up	TBXA2R	thromboxane A2 receptor
hsa-miR-101-3p	down	TCEB1	transcription elongation factor B (SIII), polypeptide 1 (15kDa, elongin C)
hsa-miR-155-5p	up	TCEB1	transcription elongation factor B (SIII), polypeptide 1 (15kDa, elongin C)
hsa-miR-6803-5p	up	TCEB2	transcription elongation factor B (SIII), polypeptide 2 (18kDa, elongin B)
hsa-miR-15a-5p	down	TCF3	transcription factor 3 (E2A immunoglobulin enhancer binding factors E12/E47)
hsa-miR-4472	up	TCF7	transcription factor 7 (T-cell specific, HMG-box)
hsa-miR-7150	up	TCF7L1	transcription factor 7-like 1 (T-cell specific, HMG-box)
hsa-miR-181a-5p	down	TEAD1	TEA domain family member 1 (SV40 transcriptional enhancer factor)
hsa-miR-5787	up	TEAD1	TEA domain family member 1 (SV40 transcriptional enhancer factor)
hsa-miR-140-3p	down	TEAD1	TEA domain family member 1 (SV40 transcriptional enhancer factor)
hsa-miR-7150	up	TEAD1	TEA domain family member 1 (SV40 transcriptional enhancer factor)
hsa-miR-5787	up	TFAP4	transcription factor AP-4 (activating enhancer binding protein 4)
hsa-miR-98-5p	up	TGDS	TDP-glucose 4,6-dehydratase
hsa-miR-148b-3p	down	TGFA	transforming growth factor, alpha
hsa-miR-148b-3p	down	TGFB2	transforming growth factor, beta 2
hsa-miR-181a-5p	down	TGFBR1	transforming growth factor, beta receptor 1
hsa-miR-101-3p	down	TGFBR1	transforming growth factor, beta receptor 1
hsa-miR-98-5p	up	TGFBR1	transforming growth factor, beta receptor 1
hsa-miR-6073	up	TGFBR1	transforming growth factor, beta receptor 1
hsa-miR-181a-5p	down	TGFBR2	transforming growth factor, beta receptor II (70/80kDa)
hsa-miR-181c-5p	down	TGFBR2	transforming growth factor, beta receptor II (70/80kDa)
hsa-miR-5096	up	THBS1	thrombospondin 1
hsa-miR-194-5p	down	THBS1	thrombospondin 1
hsa-miR-98-5p	up	THBS1	thrombospondin 1
hsa-miR-423-5p	down	THBS3	thrombospondin 3
hsa-miR-6779-5p	up	THRA	thyroid hormone receptor, alpha
hsa-miR-31-5p	down	THTPA	thiamine triphosphatase
hsa-miR-4447	up	THY1	Thy-1 cell surface antigen
hsa-miR-3620-5p	up	TJAP1	tight junction associated protein 1 (peripheral)
hsa-miR-7150	up	TLN1	talin 1
hsa-miR-6791-5p	up	TLN2	talin 2
hsa-miR-3609	down	TLR4	toll-like receptor 4
hsa-miR-30c-1-3p	up	TMPRSS13	transmembrane protease, serine 13
hsa-miR-98-5p	up	TMPRSS2	transmembrane protease, serine 2
hsa-miR-181a-5p	down	TNF	tumor necrosis factor
hsa-miR-6791-5p	up	TNF	tumor necrosis factor
hsa-miR-181c-5p	down	TNF	tumor necrosis factor
hsa-miR-22-3p	down	TNFRSF1B	tumor necrosis factor receptor superfamily, member 1B
hsa-miR-6126	up	TNFSF8	tumor necrosis factor (ligand) superfamily, member 8
hsa-miR-4447	up	TOMM40L	translocase of outer mitochondrial membrane 40 homolog (yeast)-like
hsa-miR-22-3p	down	TP53	tumor protein p53
hsa-miR-22-3p	down	TP53INP1	tumor protein p53 inducible nuclear protein 1
hsa-miR-7150	up	TP73	tumor protein p73
hsa-miR-22-3p	down	TPM3	tropomyosin 3
hsa-miR-5096	up	TPM3	tropomyosin 3
hsa-miR-6803-5p	up	TPM3	tropomyosin 3
hsa-miR-4301	up	TPM3	tropomyosin 3
hsa-miR-6791-5p	up	TRAF4	TNF receptor-associated factor 4
hsa-miR-550a-5p	down	TRAF4	TNF receptor-associated factor 4
hsa-miR-6073	up	TRAF6	TNF receptor-associated factor 6, E3 ubiquitin protein ligase
hsa-miR-148b-3p	down	TRAK2	trafficking protein, kinesin binding 2
hsa-miR-181c-5p	down	TRAK2	trafficking protein, kinesin binding 2
hsa-miR-550a-5p	down	TRAK2	trafficking protein, kinesin binding 2
hsa-miR-155-5p	up	TRIM32	tripartite motif containing 32
hsa-miR-98-5p	up	TRPM6	transient receptor potential cation channel, subfamily M, member 6
hsa-miR-22-3p	down	TRPM7	transient receptor potential cation channel, subfamily M, member 7
hsa-miR-3609	down	TRPM7	transient receptor potential cation channel, subfamily M, member 7
hsa-miR-181c-5p	down	TRPM7	transient receptor potential cation channel, subfamily M, member 7
hsa-miR-31-5p	down	TRPV6	transient receptor potential cation channel, subfamily V, member 6
hsa-miR-361-5p	down	TSC1	tuberous sclerosis 1
hsa-miR-15a-5p	down	TSC1	tuberous sclerosis 1
hsa-miR-181a-5p	down	TUBB	tubulin, beta class I
hsa-miR-181a-5p	down	TUSC3	tumor suppressor candidate 3
hsa-miR-181c-5p	down	TUSC3	tumor suppressor candidate 3
hsa-miR-101-3p	down	UBE2A	ubiquitin-conjugating enzyme E2A
hsa-miR-101-3p	down	UBE2D1	ubiquitin-conjugating enzyme E2D 1
hsa-miR-3609	down	UBE2D1	ubiquitin-conjugating enzyme E2D 1
hsa-miR-30d-5p	down	UBE2G1	ubiquitin-conjugating enzyme E2G 1
hsa-miR-101-3p	down	UBE2G1	ubiquitin-conjugating enzyme E2G 1
hsa-miR-31-5p	down	UBE2K	ubiquitin-conjugating enzyme E2K
hsa-miR-4447	up	UBE2M	ubiquitin-conjugating enzyme E2M
hsa-miR-15a-5p	down	UBE2Q1	ubiquitin-conjugating enzyme E2Q family member 1
hsa-miR-140-3p	down	UBE2Q1	ubiquitin-conjugating enzyme E2Q family member 1
hsa-miR-550a-5p	down	UBE2Q1	ubiquitin-conjugating enzyme E2Q family member 1
hsa-miR-5096	up	UBE2W	ubiquitin-conjugating enzyme E2W (putative)
hsa-miR-148b-3p	down	UBE2W	ubiquitin-conjugating enzyme E2W (putative)
hsa-miR-148a-3p	down	UBE2W	ubiquitin-conjugating enzyme E2W (putative)
hsa-miR-6791-5p	up	UBE2Z	ubiquitin-conjugating enzyme E2Z
hsa-miR-7150	up	UBE2Z	ubiquitin-conjugating enzyme E2Z
hsa-miR-30c-1-3p	up	UBE3A	ubiquitin protein ligase E3A
hsa-miR-181a-5p	down	UBE3C	ubiquitin protein ligase E3C
hsa-miR-15a-5p	down	UBE4A	ubiquitination factor E4A
hsa-miR-425-5p	down	UBQLN1	ubiquilin 1
hsa-miR-361-5p	down	UBR5	ubiquitin protein ligase E3 component n-recognin 5
hsa-miR-194-5p	down	UBR5	ubiquitin protein ligase E3 component n-recognin 5
hsa-miR-4505	up	UBR5	ubiquitin protein ligase E3 component n-recognin 5
hsa-miR-98-5p	up	ULK2	unc-51-like kinase 2 (C. elegans)
hsa-miR-181a-5p	down	UNC5A	unc-5 homolog A (C. elegans)
hsa-miR-6791-5p	up	UNC5A	unc-5 homolog A (C. elegans)
hsa-miR-4492	up	UNC5A	unc-5 homolog A (C. elegans)
hsa-miR-15a-5p	down	UNC5B	unc-5 homolog B (C. elegans)
hsa-miR-1246	up	UNC5B	unc-5 homolog B (C. elegans)
hsa-miR-1273g-3p	up	UPF2	UPF2 regulator of nonsense transcripts homolog (yeast)
hsa-miR-550a-5p	down	UPP2	uridine phosphorylase 2
hsa-miR-423-5p	down	URM1	ubiquitin related modifier 1
hsa-miR-148b-3p	down	USP7	ubiquitin specific peptidase 7 (herpes virus-associated)
hsa-miR-22-3p	down	USP8	ubiquitin specific peptidase 8
hsa-miR-6779-5p	up	VAMP1	vesicle-associated membrane protein 1 (synaptobrevin 1)
hsa-miR-6803-5p	up	VAMP2	vesicle-associated membrane protein 2 (synaptobrevin 2)
hsa-miR-140-3p	down	VAMP2	vesicle-associated membrane protein 2 (synaptobrevin 2)
hsa-miR-1275	up	VAMP2	vesicle-associated membrane protein 2 (synaptobrevin 2)
hsa-miR-1273g-3p	up	VANGL1	vang-like 1 (van gogh, Drosophila)
hsa-miR-3609	down	VANGL1	vang-like 1 (van gogh, Drosophila)
hsa-miR-4301	up	VANGL1	vang-like 1 (van gogh, Drosophila)
hsa-miR-6073	up	VANGL1	vang-like 1 (van gogh, Drosophila)
hsa-miR-140-3p	down	VANGL2	vang-like 2 (van gogh, Drosophila)
hsa-miR-30e-5p	down	VAPA	VAMP (vesicle-associated membrane protein)-associated protein A, 33kDa
hsa-miR-194-5p	down	VAPA	VAMP (vesicle-associated membrane protein)-associated protein A, 33kDa
hsa-miR-140-3p	down	VAPA	VAMP (vesicle-associated membrane protein)-associated protein A, 33kDa
hsa-miR-98-5p	up	VAV3	vav 3 guanine nucleotide exchange factor
hsa-miR-4492	up	VDR	vitamin D (1,25- dihydroxyvitamin D3) receptor
hsa-miR-6791-5p	up	VIPR1	vasoactive intestinal peptide receptor 1
hsa-miR-4492	up	VIPR1	vasoactive intestinal peptide receptor 1
hsa-miR-5787	up	VPS37C	vacuolar protein sorting 37 homolog C (S. cerevisiae)
hsa-miR-5787	up	VPS37D	vacuolar protein sorting 37 homolog D (S. cerevisiae)
hsa-miR-4508	up	VPS37D	vacuolar protein sorting 37 homolog D (S. cerevisiae)
hsa-miR-4505	up	VPS37D	vacuolar protein sorting 37 homolog D (S. cerevisiae)
hsa-miR-1273g-3p	up	WASF2	WAS protein family, member 2
hsa-miR-30c-1-3p	up	WASF2	WAS protein family, member 2
hsa-miR-6073	up	WASL	Wiskott-Aldrich syndrome-like
hsa-miR-30e-5p	down	WDR82	WD repeat domain 82
hsa-miR-22-3p	down	WDR82	WD repeat domain 82
hsa-miR-181c-5p	down	WDR82	WD repeat domain 82
hsa-miR-15a-5p	down	WEE1	WEE1 homolog (S. pombe)
hsa-miR-181a-5p	down	WHSC1	Wolf-Hirschhorn syndrome candidate 1
hsa-miR-181c-5p	down	WHSC1	Wolf-Hirschhorn syndrome candidate 1
hsa-miR-15a-5p	down	WNT3A	wingless-type MMTV integration site family, member 3A
hsa-miR-140-3p	down	WNT5A	wingless-type MMTV integration site family, member 5A
hsa-miR-3609	down	WNT5A	wingless-type MMTV integration site family, member 5A
hsa-miR-6791-5p	up	WWP2	WW domain containing E3 ubiquitin protein ligase 2
hsa-miR-5096	up	XIAP	X-linked inhibitor of apoptosis
hsa-miR-550a-5p	down	XPO5	exportin 5
hsa-miR-181a-5p	down	XRN1	5'-3' exoribonuclease 1
hsa-miR-181c-5p	down	XRN1	5'-3' exoribonuclease 1
hsa-miR-550a-5p	down	XRN1	5'-3' exoribonuclease 1
hsa-miR-6791-5p	up	XYLT1	xylosyltransferase I
hsa-miR-5787	up	XYLT2	xylosyltransferase II
hsa-miR-6791-5p	up	YKT6	YKT6 v-SNARE homolog (S. cerevisiae)
hsa-miR-181a-5p	down	YOD1	YOD1 OTU deubiquinating enzyme 1 homolog (S. cerevisiae)
hsa-miR-30e-5p	down	YOD1	YOD1 OTU deubiquinating enzyme 1 homolog (S. cerevisiae)
hsa-miR-181c-5p	down	YOD1	YOD1 OTU deubiquinating enzyme 1 homolog (S. cerevisiae)
hsa-miR-6791-5p	up	YWHAG	tyrosine 3-monooxygenase/tryptophan 5-monooxygenase activation protein, gamma polypeptide
hsa-miR-15a-5p	down	YWHAQ	tyrosine 3-monooxygenase/tryptophan 5-monooxygenase activation protein, theta polypeptide
hsa-miR-181a-5p	down	YWHAZ	tyrosine 3-monooxygenase/tryptophan 5-monooxygenase activation protein, zeta polypeptide
hsa-miR-181c-5p	down	YWHAZ	tyrosine 3-monooxygenase/tryptophan 5-monooxygenase activation protein, zeta polypeptide
hsa-miR-155-5p	up	YWHAZ	tyrosine 3-monooxygenase/tryptophan 5-monooxygenase activation protein, zeta polypeptide
hsa-miR-550a-5p	down	ZAK	sterile alpha motif and leucine zipper containing kinase AZK
hsa-miR-550a-5p	down	ZFYVE20	zinc finger, FYVE domain containing 20
hsa-miR-181a-5p	down	ZIC2	Zic family member 2
hsa-miR-181c-5p	down	ZIC2	Zic family member 2
hsa-miR-101-3p	down	ZMAT3	zinc finger, matrin-type 3
hsa-miR-148b-3p	down	ZNF274	zinc finger protein 274
hsa-miR-148a-3p	down	ZNF274	zinc finger protein 274
hsa-miR-15a-5p	down	ZYX	zyxin

## Sheet: miRNA-gene characteristic
Gene symbol	Description	Degree			miRNA	style	degree
AASS	aminoadipate-semialdehyde synthase	1			hsa-miR-101-3p	down	58
ABAT	4-aminobutyrate aminotransferase	1			hsa-miR-1246	up	9
ABCA4	ATP-binding cassette, sub-family A (ABC1), member 4	1			hsa-miR-1273g-3p	up	25
ABCB9	ATP-binding cassette, sub-family B (MDR/TAP), member 9	1			hsa-miR-1275	up	19
ABCC10	ATP-binding cassette, sub-family C (CFTR/MRP), member 10	1			hsa-miR-140-3p	down	63
ABCC5	ATP-binding cassette, sub-family C (CFTR/MRP), member 5	1			hsa-miR-148a-3p	down	52
ABCG4	ATP-binding cassette, sub-family G (WHITE), member 4	2			hsa-miR-148b-3p	down	59
ABCG8	ATP-binding cassette, sub-family G (WHITE), member 8	1			hsa-miR-155-5p	up	26
ABI2	abl-interactor 2	1			hsa-miR-15a-5p	down	158
ABL2	v-abl Abelson murine leukemia viral oncogene homolog 2	5			hsa-miR-181a-5p	down	112
ABLIM3	actin binding LIM protein family, member 3	1			hsa-miR-181c-5p	down	81
ACACA	acetyl-CoA carboxylase alpha	1			hsa-miR-194-5p	down	28
ACAP2	ArfGAP with coiled-coil, ankyrin repeat and PH domains 2	1			hsa-miR-22-3p	down	69
ACER2	alkaline ceramidase 2	1			hsa-miR-30c-1-3p	up	41
ACP2	acid phosphatase 2, lysosomal	1			hsa-miR-30d-5p	down	39
ACSL1	acyl-CoA synthetase long-chain family member 1	2			hsa-miR-30e-5p	down	61
ACSL4	acyl-CoA synthetase long-chain family member 4	1			hsa-miR-31-5p	down	31
ACSL6	acyl-CoA synthetase long-chain family member 6	1			hsa-miR-3607-5p	down	12
ACVR1	activin A receptor, type I	1			hsa-miR-3609	down	63
ACVR1B	activin A receptor, type IB	4			hsa-miR-361-5p	down	17
ACVR1C	activin A receptor, type IC	1			hsa-miR-3620-5p	up	34
ACVR2A	activin A receptor, type IIA	2			hsa-miR-423-5p	down	28
ACVR2B	activin A receptor, type IIB	7			hsa-miR-425-5p	down	9
ADAM17	ADAM metallopeptidase domain 17	1			hsa-miR-4301	up	8
ADCY1	adenylate cyclase 1 (brain)	2			hsa-miR-4447	up	18
ADCY2	adenylate cyclase 2 (brain)	3			hsa-miR-4472	up	20
ADCY5	adenylate cyclase 5	1			hsa-miR-4484	up	6
ADCY6	adenylate cyclase 6	6			hsa-miR-4492	up	41
ADCY9	adenylate cyclase 9	1			hsa-miR-4505	up	73
ADCYAP1	adenylate cyclase activating polypeptide 1 (pituitary)	1			hsa-miR-4508	up	2
ADRA1D	adrenergic, alpha-1D-, receptor	1			hsa-miR-4638-5p	up	1
ADRBK1	adrenergic, beta, receptor kinase 1	5			hsa-miR-4687-3p	up	16
ADRBK2	adrenergic, beta, receptor kinase 2	3			hsa-miR-4734	down	4
AFF1	AF4/FMR2 family, member 1	1			hsa-miR-5096	up	37
AGAP2	ArfGAP with GTPase domain, ankyrin repeat and PH domain 2	6			hsa-miR-550a-5p	down	37
AGAP3	ArfGAP with GTPase domain, ankyrin repeat and PH domain 3	4			hsa-miR-5787	up	106
AGFG1	ArfGAP with FG repeats 1	1			hsa-miR-6073	up	12
AGPAT4	1-acylglycerol-3-phosphate O-acyltransferase 4 (lysophosphatidic acid acyltransferase, delta)	1			hsa-miR-6126	up	9
AGPAT6	1-acylglycerol-3-phosphate O-acyltransferase 6 (lysophosphatidic acid acyltransferase, zeta)	1			hsa-miR-6779-5p	up	48
AHCYL2	adenosylhomocysteinase-like 2	2			hsa-miR-6791-5p	up	90
AK1	adenylate kinase 1	1			hsa-miR-6803-5p	up	19
AK2	adenylate kinase 2	1			hsa-miR-7150	up	55
AKT2	v-akt murine thymoma viral oncogene homolog 2	2			hsa-miR-7641	up	7
AKT3	v-akt murine thymoma viral oncogene homolog 3 (protein kinase B, gamma)	1			hsa-miR-98-5p	up	98
ALCAM	activated leukocyte cell adhesion molecule	2
ALDH1A3	aldehyde dehydrogenase 1 family, member A3	1
ALDH7A1	aldehyde dehydrogenase 7 family, member A1	1
ALG9	asparagine-linked glycosylation 9, alpha-1,2-mannosyltransferase homolog (S. cerevisiae)	3
AMOT	angiomotin	1
AMOTL1	angiomotin like 1	1
AMPH	amphiphysin	1
ANK1	ankyrin 1, erythrocytic	1
ANK2	ankyrin 2, neuronal	1
ANK3	ankyrin 3, node of Ranvier (ankyrin G)	1
AP1S2	adaptor-related protein complex 1, sigma 2 subunit	1
AP3S1	adaptor-related protein complex 3, sigma 1 subunit	1
AP3S2	adaptor-related protein complex 3, sigma 2 subunit	1
AP4E1	adaptor-related protein complex 4, epsilon 1 subunit	2
APPL1	adaptor protein, phosphotyrosine interaction, PH domain and leucine zipper containing 1	1
AQP1	aquaporin 1 (Colton blood group)	1
AQP4	aquaporin 4	1
ARC	activity-regulated cytoskeleton-associated protein	1
ARFGAP2	ADP-ribosylation factor GTPase activating protein 2	1
ARHGAP5	Rho GTPase activating protein 5	1
ARHGDIA	Rho GDP dissociation inhibitor (GDI) alpha	3
ARHGEF12	Rho guanine nucleotide exchange factor (GEF) 12	2
ARHGEF2	Rho/Rac guanine nucleotide exchange factor (GEF) 2	1
ARHGEF4	Rho guanine nucleotide exchange factor (GEF) 4	2
ARHGEF6	Rac/Cdc42 guanine nucleotide exchange factor (GEF) 6	1
ARNT	aryl hydrocarbon receptor nuclear translocator	1
ARNT2	aryl-hydrocarbon receptor nuclear translocator 2	2
ARPC5	actin related protein 2/3 complex, subunit 5, 16kDa	1
ARRB2	arrestin, beta 2	2
ASAH1	N-acylsphingosine amidohydrolase (acid ceramidase) 1	1
ASAP1	ArfGAP with SH3 domain, ankyrin repeat and PH domain 1	2
ATF1	activating transcription factor 1	1
ATP1B2	ATPase, Na+/K+ transporting, beta 2 polypeptide	3
ATP1B4	ATPase, Na+/K+ transporting, beta 4 polypeptide	3
ATP2A2	ATPase, Ca++ transporting, cardiac muscle, slow twitch 2	2
ATP2B1	ATPase, Ca++ transporting, plasma membrane 1	1
ATP2B2	ATPase, Ca++ transporting, plasma membrane 2	2
ATP2B3	ATPase, Ca++ transporting, plasma membrane 3	1
ATP2B4	ATPase, Ca++ transporting, plasma membrane 4	3
ATP6V1B2	ATPase, H+ transporting, lysosomal 56/58kDa, V1 subunit B2	1
ATP6V1C1	ATPase, H+ transporting, lysosomal 42kDa, V1 subunit C1	1
ATP6V1G1	ATPase, H+ transporting, lysosomal 13kDa, V1 subunit G1	1
ATP7A	ATPase, Cu++ transporting, alpha polypeptide	1
ATXN3	ataxin 3	2
AXIN1	axin 1	1
AXIN2	axin 2	1
B4GALNT1	beta-1,4-N-acetyl-galactosaminyl transferase 1	1
B4GALT1	UDP-Gal:betaGlcNAc beta 1,4- galactosyltransferase, polypeptide 1	1
B4GALT2	UDP-Gal:betaGlcNAc beta 1,4- galactosyltransferase, polypeptide 2	1
B4GALT6	UDP-Gal:betaGlcNAc beta 1,4- galactosyltransferase, polypeptide 6	4
BACE1	beta-site APP-cleaving enzyme 1	1
BAIAP2	BAI1-associated protein 2	1
BBC3	BCL2 binding component 3	3
BCAT1	branched chain amino-acid transaminase 1, cytosolic	1
BCAT2	branched chain amino-acid transaminase 2, mitochondrial	2
BCL2	B-cell CLL/lymphoma 2	2
BCL2L11	BCL2-like 11 (apoptosis facilitator)	5
BHLHE41	basic helix-loop-helix family, member e41	1
BIRC6	baculoviral IAP repeat containing 6	1
BMPR2	bone morphogenetic protein receptor, type II (serine/threonine kinase)	2
BTG2	BTG family, member 2	1
BTRC	beta-transducin repeat containing E3 ubiquitin protein ligase	3
C2	complement component 2	1
CAB39	calcium binding protein 39	2
CACNA1B	calcium channel, voltage-dependent, N type, alpha 1B subunit	1
CACNA1C	calcium channel, voltage-dependent, L type, alpha 1C subunit	2
CACNA1E	calcium channel, voltage-dependent, R type, alpha 1E subunit	1
CACNA2D2	calcium channel, voltage-dependent, alpha 2/delta subunit 2	2
CACNB1	calcium channel, voltage-dependent, beta 1 subunit	1
CACNB2	calcium channel, voltage-dependent, beta 2 subunit	2
CACNB3	calcium channel, voltage-dependent, beta 3 subunit	2
CADM1	cell adhesion molecule 1	2
CADM3	cell adhesion molecule 3	1
CALCR	calcitonin receptor	4
CALM1	calmodulin 1 (phosphorylase kinase, delta)	1
CALM2	calmodulin 2 (phosphorylase kinase, delta)	1
CALM3	calmodulin 3 (phosphorylase kinase, delta)	1
CAMK2A	calcium/calmodulin-dependent protein kinase II alpha	3
CAMK2G	calcium/calmodulin-dependent protein kinase II gamma	1
CAMKK1	calcium/calmodulin-dependent protein kinase kinase 1, alpha	2
CAMKK2	calcium/calmodulin-dependent protein kinase kinase 2, beta	1
CANT1	calcium activated nucleotidase 1	1
CAPN1	calpain 1, (mu/I) large subunit	1
CARD11	caspase recruitment domain family, member 11	2
CASC3	cancer susceptibility candidate 3	1
CASK	calcium/calmodulin-dependent serine protein kinase (MAGUK family)	2
CASP10	caspase 10, apoptosis-related cysteine peptidase	1
CAV1	caveolin 1, caveolae protein, 22kDa	1
CAV3	caveolin 3	1
CBL	Cbl proto-oncogene, E3 ubiquitin protein ligase	6
CCDC6	coiled-coil domain containing 6	2
CCKBR	cholecystokinin B receptor	2
CCL22	chemokine (C-C motif) ligand 22	1
CCND1	cyclin D1	1
CCND2	cyclin D2	2
CCNE1	cyclin E1	1
CCNG1	cyclin G1	2
CCNT2	cyclin T2	3
CCR7	chemokine (C-C motif) receptor 7	1
CD164	CD164 molecule, sialomucin	1
CD274	CD274 molecule	1
CD28	CD28 molecule	1
CD4	CD4 molecule	2
CDC14B	CDC14 cell division cycle 14 homolog B (S. cerevisiae)	2
CDC27	cell division cycle 27 homolog (S. cerevisiae)	2
CDC34	cell division cycle 34 homolog (S. cerevisiae)	1
CDC42	cell division cycle 42 (GTP binding protein, 25kDa)	1
CDH5	cadherin 5, type 2 (vascular endothelium)	2
CDK5R1	cyclin-dependent kinase 5, regulatory subunit 1 (p35)	1
CDK6	cyclin-dependent kinase 6	2
CDKN1A	cyclin-dependent kinase inhibitor 1A (p21, Cip1)	2
CFL1	cofilin 1 (non-muscle)	1
CFL2	cofilin 2 (muscle)	1
CHEK1	checkpoint kinase 1	1
CHMP7	charged multivesicular body protein 7	1
CHRD	chordin	2
CHRM1	cholinergic receptor, muscarinic 1	3
CHRNB2	cholinergic receptor, nicotinic, beta 2 (neuronal)	1
CIITA	class II, major histocompatibility complex, transactivator	1
CKM	creatine kinase, muscle	1
CLCF1	cardiotrophin-like cytokine factor 1	2
CLDN19	claudin 19	1
CLDN2	claudin 2	1
CLDN7	claudin 7	1
CLOCK	clock homolog (mouse)	1
CLTB	clathrin, light chain B	1
CNOT2	CCR4-NOT transcription complex, subunit 2	1
CNOT4	CCR4-NOT transcription complex, subunit 4	1
CNOT6	CCR4-NOT transcription complex, subunit 6	2
CNOT6L	CCR4-NOT transcription complex, subunit 6-like	5
CNR1	cannabinoid receptor 1 (brain)	4
CNTFR	ciliary neurotrophic factor receptor	3
CNTN2	contactin 2 (axonal)	1
COL11A2	collagen, type XI, alpha 2	1
COL14A1	collagen, type XIV, alpha 1	1
COL15A1	collagen, type XV, alpha 1	1
COL1A1	collagen, type I, alpha 1	1
COL21A1	collagen, type XXI, alpha 1	1
COL24A1	collagen, type XXIV, alpha 1	1
COL4A2	collagen, type IV, alpha 2	1
COL5A1	collagen, type V, alpha 1	1
CPEB1	cytoplasmic polyadenylation element binding protein 1	1
CPLX2	complexin 2	7
CPLX3	complexin 3	3
CPOX	coproporphyrinogen oxidase	1
CPSF6	cleavage and polyadenylation specific factor 6, 68kDa	4
CPT1A	carnitine palmitoyltransferase 1A (liver)	2
CRB2	crumbs homolog 2 (Drosophila)	1
CREB1	cAMP responsive element binding protein 1	1
CRKL	v-crk sarcoma virus CT10 oncogene homolog (avian)-like	1
CRTC1	CREB regulated transcription coactivator 1	3
CRTC2	CREB regulated transcription coactivator 2	2
CRY2	cryptochrome 2 (photolyase-like)	2
CSF1	colony stimulating factor 1 (macrophage)	2
CSF1R	colony stimulating factor 1 receptor	1
CSK	c-src tyrosine kinase	1
CSNK1G1	casein kinase 1, gamma 1	2
CTNNBIP1	catenin, beta interacting protein 1	2
CTNND1	catenin (cadherin-associated protein), delta 1	1
CTNS	cystinosin, lysosomal cystine transporter	1
CTPS2	CTP synthase II	1
CTSA	cathepsin A	3
CUL2	cullin 2	1
CUL3	cullin 3	2
CUL4B	cullin 4B	1
CUL5	cullin 5	1
CX3CL1	chemokine (C-X3-C motif) ligand 1	3
CXCL12	chemokine (C-X-C motif) ligand 12	1
CXCR5	chemokine (C-X-C motif) receptor 5	1
CYP19A1	cytochrome P450, family 19, subfamily A, polypeptide 1	1
CYP27B1	cytochrome P450, family 27, subfamily B, polypeptide 1	1
DAAM2	dishevelled associated activator of morphogenesis 2	1
DAG1	dystroglycan 1 (dystrophin-associated glycoprotein 1)	1
DAGLA	diacylglycerol lipase, alpha	7
DAPK1	death-associated protein kinase 1	1
DAPK2	death-associated protein kinase 2	1
DCN	decorin	2
DCP1A	DCP1 decapping enzyme homolog A (S. cerevisiae)	2
DCP2	DCP2 decapping enzyme homolog (S. cerevisiae)	1
DCTD	dCMP deaminase	1
DCTN4	dynactin 4 (p62)	2
DCTN5	dynactin 5 (p25)	1
DDIT4	DNA-damage-inducible transcript 4	6
DDX3X	DEAD (Asp-Glu-Ala-Asp) box polypeptide 3, X-linked	3
DDX3Y	DEAD (Asp-Glu-Ala-Asp) box polypeptide 3, Y-linked	2
DERL1	Der1-like domain family, member 1	2
DET1	de-etiolated homolog 1 (Arabidopsis)	1
DGKA	diacylglycerol kinase, alpha 80kDa	1
DGKE	diacylglycerol kinase, epsilon 64kDa	1
DGKG	diacylglycerol kinase, gamma 90kDa	1
DGKZ	diacylglycerol kinase, zeta	1
DHCR24	24-dehydrocholesterol reductase	2
DLG3	discs, large homolog 3 (Drosophila)	1
DLGAP1	discs, large (Drosophila) homolog-associated protein 1	2
DLST	dihydrolipoamide S-succinyltransferase (E2 component of 2-oxo-glutarate complex)	2
DNAJB12	DnaJ (Hsp40) homolog, subfamily B, member 12	2
DNM2	dynamin 2	3
DNM3	dynamin 3	1
DNMT3A	DNA (cytosine-5-)-methyltransferase 3 alpha	3
DNMT3B	DNA (cytosine-5-)-methyltransferase 3 beta	1
DOCK1	dedicator of cytokinesis 1	1
DOLPP1	dolichyl pyrophosphate phosphatase 1	1
DPM2	dolichyl-phosphate mannosyltransferase polypeptide 2, regulatory subunit	1
DPYSL5	dihydropyrimidinase-like 5	4
DTX3	deltex homolog 3 (Drosophila)	2
DTX3L	deltex 3-like (Drosophila)	1
DTX4	deltex homolog 4 (Drosophila)	1
DUSP16	dual specificity phosphatase 16	1
DUSP4	dual specificity phosphatase 4	1
DUSP8	dual specificity phosphatase 8	1
DUSP9	dual specificity phosphatase 9	1
DVL3	dishevelled, dsh homolog 3 (Drosophila)	3
DYNC1LI2	dynein, cytoplasmic 1, light intermediate chain 2	1
DYNLL2	dynein, light chain, LC8-type 2	2
E2F1	E2F transcription factor 1	1
E2F2	E2F transcription factor 2	3
E2F3	E2F transcription factor 3	2
EDA	ectodysplasin A	4
EDC3	enhancer of mRNA decapping 3 homolog (S. cerevisiae)	2
EDEM1	ER degradation enhancer, mannosidase alpha-like 1	1
EDNRA	endothelin receptor type A	2
EFNB3	ephrin-B3	2
EGLN2	egl nine homolog 2 (C. elegans)	1
EGR1	early growth response 1	1
EGR3	early growth response 3	2
EHD2	EH-domain containing 2	2
EHD3	EH-domain containing 3	1
EI24	etoposide induced 2.4 mRNA	1
EIF3A	eukaryotic translation initiation factor 3, subunit A	1
EIF4A2	eukaryotic translation initiation factor 4A2	2
EIF4B	eukaryotic translation initiation factor 4B	2
EIF4E	eukaryotic translation initiation factor 4E	1
EIF4G3	eukaryotic translation initiation factor 4 gamma, 3	1
EIF5	eukaryotic translation initiation factor 5	1
ELK1	ELK1, member of ETS oncogene family	7
ELN	elastin	1
ENAH	enabled homolog (Drosophila)	4
EP300	E1A binding protein p300	1
EPB41	erythrocyte membrane protein band 4.1 (elliptocytosis 1, RH-linked)	4
EPB41L3	erythrocyte membrane protein band 4.1-like 3	2
EPHA1	EPH receptor A1	1
EPHA4	EPH receptor A4	2
EPHA5	EPH receptor A5	2
EPHA8	EPH receptor A8	1
EPHB2	EPH receptor B2	1
EPHB3	EPH receptor B3	2
EPN2	epsin 2	1
EPS15	epidermal growth factor receptor pathway substrate 15	3
ERBB3	v-erb-b2 erythroblastic leukemia viral oncogene homolog 3 (avian)	1
ERBB4	v-erb-a erythroblastic leukemia viral oncogene homolog 4 (avian)	1
ERG	v-ets erythroblastosis virus E26 oncogene homolog (avian)	1
ESPL1	extra spindle pole bodies homolog 1 (S. cerevisiae)	1
ESR1	estrogen receptor 1	4
ETF1	eukaryotic translation termination factor 1	2
ETNK1	ethanolamine kinase 1	2
ETS1	v-ets erythroblastosis virus E26 oncogene homolog 1 (avian)	1
ETS2	v-ets erythroblastosis virus E26 oncogene homolog 2 (avian)	1
ETV1	ets variant 1	2
ETV6	ets variant 6	1
EXOSC3	exosome component 3	2
EXTL3	exostoses (multiple)-like 3	1
EYA1	eyes absent homolog 1 (Drosophila)	3
FAHD1	fumarylacetoacetate hydrolase domain containing 1	2
FAS	Fas (TNF receptor superfamily, member 6)	1
FASLG	Fas ligand (TNF superfamily, member 6)	1
FBXL3	F-box and leucine-rich repeat protein 3	1
FBXW7	F-box and WD repeat domain containing 7, E3 ubiquitin protein ligase	3
FGD1	FYVE, RhoGEF and PH domain containing 1	1
FGF11	fibroblast growth factor 11	1
FGF17	fibroblast growth factor 17	1
FGF7	fibroblast growth factor 7	1
FGF9	fibroblast growth factor 9 (glia-activating factor)	1
FGFR1	fibroblast growth factor receptor 1	2
FGFR3	fibroblast growth factor receptor 3	1
FKBP5	FK506 binding protein 5	1
FLNC	filamin C, gamma	4
FLOT2	flotillin 2	2
FLT1	fms-related tyrosine kinase 1 (vascular endothelial growth factor/vascular permeability factor receptor)	2
FLT3	fms-related tyrosine kinase 3	1
FMR1	fragile X mental retardation 1	3
FOS	FBJ murine osteosarcoma viral oncogene homolog	4
FOSB	FBJ murine osteosarcoma viral oncogene homolog B	3
FOSL2	FOS-like antigen 2	2
FOXO1	forkhead box O1	2
FOXO3	forkhead box O3	2
FRS2	fibroblast growth factor receptor substrate 2	2
FTL	ferritin, light polypeptide	1
FURIN	furin (paired basic amino acid cleaving enzyme)	3
FUT9	fucosyltransferase 9 (alpha (1,3) fucosyltransferase)	1
FZD3	frizzled family receptor 3	2
FZD4	frizzled family receptor 4	4
GAB1	GRB2-associated binding protein 1	1
GAB2	GRB2-associated binding protein 2	4
GABBR1	gamma-aminobutyric acid (GABA) B receptor, 1	2
GABBR2	gamma-aminobutyric acid (GABA) B receptor, 2	2
GABRA1	gamma-aminobutyric acid (GABA) A receptor, alpha 1	2
GABRA3	gamma-aminobutyric acid (GABA) A receptor, alpha 3	1
GABRA4	gamma-aminobutyric acid (GABA) A receptor, alpha 4	1
GABRB2	gamma-aminobutyric acid (GABA) A receptor, beta 2	2
GAD2	glutamate decarboxylase 2 (pancreatic islets and brain, 65kDa)	2
GALE	UDP-galactose-4-epimerase	1
GALNT1	UDP-N-acetyl-alpha-D-galactosamine:polypeptide N-acetylgalactosaminyltransferase 1 (GalNAc-T1)	1
GALNT10	UDP-N-acetyl-alpha-D-galactosamine:polypeptide N-acetylgalactosaminyltransferase 10 (GalNAc-T10)	1
GALNT2	UDP-N-acetyl-alpha-D-galactosamine:polypeptide N-acetylgalactosaminyltransferase 2 (GalNAc-T2)	2
GALNT3	UDP-N-acetyl-alpha-D-galactosamine:polypeptide N-acetylgalactosaminyltransferase 3 (GalNAc-T3)	2
GATM	glycine amidinotransferase (L-arginine:glycine amidinotransferase)	2
GCLC	glutamate-cysteine ligase, catalytic subunit	1
GCNT1	glucosaminyl (N-acetyl) transferase 1, core 2	1
GCNT2	glucosaminyl (N-acetyl) transferase 2, I-branching enzyme (I blood group)	3
GDF6	growth differentiation factor 6	5
GFPT1	glutamine--fructose-6-phosphate transaminase 1	2
GGA1	golgi-associated, gamma adaptin ear containing, ARF binding protein 1	3
GGA3	golgi-associated, gamma adaptin ear containing, ARF binding protein 3	1
GGT7	gamma-glutamyltransferase 7	3
GIT1	G protein-coupled receptor kinase interacting ArfGAP 1	3
GJA1	gap junction protein, alpha 1, 43kDa	2
GLDC	glycine dehydrogenase (decarboxylating)	1
GLG1	golgi glycoprotein 1	1
GLI1	GLI family zinc finger 1	1
GLI2	GLI family zinc finger 2	1
GLP1R	glucagon-like peptide 1 receptor	2
GLS	glutaminase	1
GLS2	glutaminase 2 (liver, mitochondrial)	1
GLUL	glutamate-ammonia ligase	1
GM2A	GM2 ganglioside activator	1
GNA12	guanine nucleotide binding protein (G protein) alpha 12	1
GNAI2	guanine nucleotide binding protein (G protein), alpha inhibiting activity polypeptide 2	4
GNAI3	guanine nucleotide binding protein (G protein), alpha inhibiting activity polypeptide 3	1
GNAL	guanine nucleotide binding protein (G protein), alpha activating activity polypeptide, olfactory type	1
GNAO1	guanine nucleotide binding protein (G protein), alpha activating activity polypeptide O	2
GNAT1	guanine nucleotide binding protein (G protein), alpha transducing activity polypeptide 1	1
GNB4	guanine nucleotide binding protein (G protein), beta polypeptide 4	4
GNG12	guanine nucleotide binding protein (G protein), gamma 12	1
GNG2	guanine nucleotide binding protein (G protein), gamma 2	1
GNG5	guanine nucleotide binding protein (G protein), gamma 5	1
GNPDA1	glucosamine-6-phosphate deaminase 1	1
GNRHR	gonadotropin-releasing hormone receptor	2
GNS	glucosamine (N-acetyl)-6-sulfatase	2
GOLPH3	golgi phosphoprotein 3 (coat-protein)	1
GOLPH3L	golgi phosphoprotein 3-like	1
GOSR2	golgi SNAP receptor complex member 2	1
GOT2	glutamic-oxaloacetic transaminase 2, mitochondrial (aspartate aminotransferase 2)	3
GPC3	glypican 3	1
GPC4	glypican 4	1
GPD1	glycerol-3-phosphate dehydrogenase 1 (soluble)	1
GPR83	G protein-coupled receptor 83	2
GRB2	growth factor receptor-bound protein 2	1
GRIA1	glutamate receptor, ionotropic, AMPA 1	1
GRIA2	glutamate receptor, ionotropic, AMPA 2	2
GRIK2	glutamate receptor, ionotropic, kainate 2	1
GRIK3	glutamate receptor, ionotropic, kainate 3	4
GRIK5	glutamate receptor, ionotropic, kainate 5	1
GRIN1	glutamate receptor, ionotropic, N-methyl D-aspartate 1	3
GRIN2A	glutamate receptor, ionotropic, N-methyl D-aspartate 2A	2
GRIN2D	glutamate receptor, ionotropic, N-methyl D-aspartate 2D	1
GRM1	glutamate receptor, metabotropic 1	3
GRM2	glutamate receptor, metabotropic 2	2
GRM5	glutamate receptor, metabotropic 5	2
GRM7	glutamate receptor, metabotropic 7	1
GSK3B	glycogen synthase kinase 3 beta	1
GTF2E1	general transcription factor IIE, polypeptide 1, alpha 56kDa	1
GUCY1A3	guanylate cyclase 1, soluble, alpha 3	1
H2AFV	H2A histone family, member V	1
H3F3B	H3 histone, family 3B (H3.3B)	1
H6PD	hexose-6-phosphate dehydrogenase (glucose 1-dehydrogenase)	2
HBEGF	heparin-binding EGF-like growth factor	1
HBS1L	HBS1-like (S. cerevisiae)	2
HDAC4	histone deacetylase 4	2
HDAC5	histone deacetylase 5	1
HDAC8	histone deacetylase 8	1
HDAC9	histone deacetylase 9	1
HERC4	HECT and RLD domain containing E3 ubiquitin protein ligase 4	1
HGS	hepatocyte growth factor-regulated tyrosine kinase substrate	1
HHEX	hematopoietically expressed homeobox	2
HMBS	hydroxymethylbilane synthase	1
HMGA2	high mobility group AT-hook 2	2
HMGCL	3-hydroxymethyl-3-methylglutaryl-CoA lyase	1
HNRNPUL1	heterogeneous nuclear ribonucleoprotein U-like 1	2
HOMER1	homer homolog 1 (Drosophila)	2
HOXA10	homeobox A10	1
HOXA11	homeobox A11	1
HOXC10	homeobox C10	1
HPSE2	heparanase 2	1
HS2ST1	heparan sulfate 2-O-sulfotransferase 1	5
HS3ST2	heparan sulfate (glucosamine) 3-O-sulfotransferase 2	1
HS6ST2	heparan sulfate 6-O-sulfotransferase 2	1
HS6ST3	heparan sulfate 6-O-sulfotransferase 3	1
HSPG2	heparan sulfate proteoglycan 2	4
HTR1E	5-hydroxytryptamine (serotonin) receptor 1E, G protein-coupled	1
HTR2A	5-hydroxytryptamine (serotonin) receptor 2A, G protein-coupled	1
HTR4	5-hydroxytryptamine (serotonin) receptor 4, G protein-coupled	2
HYOU1	hypoxia up-regulated 1	3
ICOSLG	inducible T-cell co-stimulator ligand	1
IDH1	isocitrate dehydrogenase 1 (NADP+), soluble	1
IDS	iduronate 2-sulfatase	1
IFNAR2	interferon (alpha, beta and omega) receptor 2	1
IGF1	insulin-like growth factor 1 (somatomedin C)	5
IGF1R	insulin-like growth factor 1 receptor	4
IKBKB	inhibitor of kappa light polypeptide gene enhancer in B-cells, kinase beta	1
IL10RA	interleukin 10 receptor, alpha	1
IL13	interleukin 13	3
IL13RA1	interleukin 13 receptor, alpha 1	1
IL15	interleukin 15	1
IL2	interleukin 2	2
IL20RA	interleukin 20 receptor, alpha	1
IL2RB	interleukin 2 receptor, beta	1
ILK	integrin-linked kinase	1
INHBE	inhibin, beta E	1
INPP4A	inositol polyphosphate-4-phosphatase, type I, 107kDa	3
INPP5A	inositol polyphosphate-5-phosphatase, 40kDa	1
INPP5K	inositol polyphosphate-5-phosphatase K	2
INSR	insulin receptor	1
IPPK	inositol 1,3,4,5,6-pentakisphosphate 2-kinase	1
IQGAP1	IQ motif containing GTPase activating protein 1	1
IQSEC1	IQ motif and Sec7 domain 1	1
IQSEC2	IQ motif and Sec7 domain 2	1
IRF1	interferon regulatory factor 1	1
IRS1	insulin receptor substrate 1	1
IRS2	insulin receptor substrate 2	6
ITGA10	integrin, alpha 10	2
ITGA11	integrin, alpha 11	2
ITGA3	integrin, alpha 3 (antigen CD49C, alpha 3 subunit of VLA-3 receptor)	3
ITGA4	integrin, alpha 4 (antigen CD49D, alpha 4 subunit of VLA-4 receptor)	1
ITGA5	integrin, alpha 5 (fibronectin receptor, alpha polypeptide)	4
ITGB8	integrin, beta 8	5
IVD	isovaleryl-CoA dehydrogenase	1
JAG1	jagged 1	1
JAK2	Janus kinase 2	1
JMJD1C	jumonji domain containing 1C	1
KAT2A	K(lysine) acetyltransferase 2A	2
KCNK10	potassium channel, subfamily K, member 10	2
KCNQ1	potassium voltage-gated channel, KQT-like subfamily, member 1	1
KDM6A	lysine (K)-specific demethylase 6A	2
KIF5A	kinesin family member 5A	2
KIF5B	kinesin family member 5B	1
KLF3	Kruppel-like factor 3 (basic)	3
KPNA1	karyopherin alpha 1 (importin alpha 5)	4
KPNB1	karyopherin (importin) beta 1	2
KRAS	v-Ki-ras2 Kirsten rat sarcoma viral oncogene homolog	3
KSR1	kinase suppressor of ras 1	1
L1CAM	L1 cell adhesion molecule	2
LAMA3	laminin, alpha 3	1
LAMA4	laminin, alpha 4	2
LAMC1	laminin, gamma 1 (formerly LAMB2)	2
LAMP1	lysosomal-associated membrane protein 1	1
LAMP2	lysosomal-associated membrane protein 2	2
LAPTM5	lysosomal protein transmembrane 5	2
LAT	linker for activation of T cells	2
LATS2	LATS, large tumor suppressor, homolog 2 (Drosophila)	1
LDB1	LIM domain binding 1	1
LDLR	low density lipoprotein receptor	2
LHB	luteinizing hormone beta polypeptide	1
LIF	leukemia inhibitory factor	1
LIFR	leukemia inhibitory factor receptor alpha	3
LIMK2	LIM domain kinase 2	3
LPAR5	lysophosphatidic acid receptor 5	1
LPCAT3	lysophosphatidylcholine acyltransferase 3	1
LPGAT1	lysophosphatidylglycerol acyltransferase 1	2
LPIN2	lipin 2	1
LRP1	low density lipoprotein receptor-related protein 1	2
LRP6	low density lipoprotein receptor-related protein 6	3
LSS	lanosterol synthase (2,3-oxidosqualene-lanosterol cyclase)	1
LTB4R	leukotriene B4 receptor	1
LYPLA2	lysophospholipase II	1
M6PR	mannose-6-phosphate receptor (cation dependent)	2
MAG	myelin associated glycoprotein	2
MAGI1	membrane associated guanylate kinase, WW and PDZ domain containing 1	3
MAGI2	membrane associated guanylate kinase, WW and PDZ domain containing 2	1
MAML1	mastermind-like 1 (Drosophila)	1
MAP2K1	mitogen-activated protein kinase kinase 1	1
MAP2K4	mitogen-activated protein kinase kinase 4	1
MAP2K7	mitogen-activated protein kinase kinase 7	3
MAP3K1	mitogen-activated protein kinase kinase kinase 1, E3 ubiquitin protein ligase	2
MAP3K11	mitogen-activated protein kinase kinase kinase 11	1
MAP3K12	mitogen-activated protein kinase kinase kinase 12	3
MAP3K14	mitogen-activated protein kinase kinase kinase 14	3
MAP3K3	mitogen-activated protein kinase kinase kinase 3	3
MAP3K4	mitogen-activated protein kinase kinase kinase 4	2
MAP3K5	mitogen-activated protein kinase kinase kinase 5	1
MAP4K3	mitogen-activated protein kinase kinase kinase kinase 3	1
MAP4K4	mitogen-activated protein kinase kinase kinase kinase 4	3
MAPK1	mitogen-activated protein kinase 1	4
MAPK14	mitogen-activated protein kinase 14	1
MARCH6	membrane-associated ring finger (C3HC4) 6, E3 ubiquitin protein ligase	1
MARCKS	myristoylated alanine-rich protein kinase C substrate	1
MARCKSL1	MARCKS-like 1	1
MAVS	mitochondrial antiviral signaling protein	1
MAX	MYC associated factor X	1
MBOAT1	membrane bound O-acyltransferase domain containing 1	2
MBOAT2	membrane bound O-acyltransferase domain containing 2	1
MC2R	melanocortin 2 receptor (adrenocorticotropic hormone)	1
MCHR1	melanin-concentrating hormone receptor 1	1
MCL1	myeloid cell leukemia sequence 1 (BCL2-related)	1
MDM4	Mdm4 p53 binding protein homolog (mouse)	3
MEF2C	myocyte enhancer factor 2C	1
MFNG	MFNG O-fucosylpeptide 3-beta-N-acetylglucosaminyltransferase	2
MFSD8	major facilitator superfamily domain containing 8	1
MGAT3	mannosyl (beta-1,4-)-glycoprotein beta-1,4-N-acetylglucosaminyltransferase	2
MGAT4A	mannosyl (alpha-1,3-)-glycoprotein beta-1,4-N-acetylglucosaminyltransferase, isozyme A	6
MGAT4B	mannosyl (alpha-1,3-)-glycoprotein beta-1,4-N-acetylglucosaminyltransferase, isozyme B	1
MGLL	monoglyceride lipase	2
MID1	midline 1 (Opitz/BBB syndrome)	1
MITF	microphthalmia-associated transcription factor	2
MKNK1	MAP kinase interacting serine/threonine kinase 1	2
MLF1	myeloid leukemia factor 1	1
MLLT4	myeloid/lymphoid or mixed-lineage leukemia (trithorax homolog, Drosophila); translocated to, 4	1
MMAB	methylmalonic aciduria (cobalamin deficiency) cblB type	1
MMP14	matrix metallopeptidase 14 (membrane-inserted)	1
MMP2	matrix metallopeptidase 2 (gelatinase A, 72kDa gelatinase, 72kDa type IV collagenase)	1
MOCS1	molybdenum cofactor synthesis 1	2
MOCS2	molybdenum cofactor synthesis 2	1
MPDZ	multiple PDZ domain protein	1
MPP5	membrane protein, palmitoylated 5 (MAGUK p55 subfamily member 5)	1
MPZ	myelin protein zero	1
MRAS	muscle RAS oncogene homolog	1
MRVI1	murine retrovirus integration site 1 homolog	1
MSH3	mutS homolog 3 (E. coli)	1
MSI1	musashi homolog 1 (Drosophila)	5
MSI2	musashi homolog 2 (Drosophila)	1
MSN	moesin	1
MTHFR	methylenetetrahydrofolate reductase (NAD(P)H)	1
MYB	v-myb myeloblastosis viral oncogene homolog (avian)	2
MYBL1	v-myb myeloblastosis viral oncogene homolog (avian)-like 1	2
MYCN	v-myc myelocytomatosis viral related oncogene, neuroblastoma derived (avian)	2
MYLK	myosin light chain kinase	1
MYLK2	myosin light chain kinase 2	1
MYLK4	myosin light chain kinase family, member 4	3
MYO10	myosin X	1
NADK	NAD kinase	1
NCOR1	nuclear receptor corepressor 1	1
NCOR2	nuclear receptor corepressor 2	3
NCSTN	nicastrin	1
NDST1	N-deacetylase/N-sulfotransferase (heparan glucosaminyl) 1	4
NDST3	N-deacetylase/N-sulfotransferase (heparan glucosaminyl) 3	2
NEDD4	neural precursor cell expressed, developmentally down-regulated 4, E3 ubiquitin protein ligase	1
NEFL	neurofilament, light polypeptide	2
NEO1	neogenin 1	1
NF2	neurofibromin 2 (merlin)	3
NFASC	neurofascin	5
NFAT5	nuclear factor of activated T-cells 5, tonicity-responsive	6
NFATC4	nuclear factor of activated T-cells, cytoplasmic, calcineurin-dependent 4	1
NFYA	nuclear transcription factor Y, alpha	5
NFYB	nuclear transcription factor Y, beta	1
NFYC	nuclear transcription factor Y, gamma	1
NGFR	nerve growth factor receptor	4
NKD1	naked cuticle homolog 1 (Drosophila)	3
NLGN2	neuroligin 2	1
NLGN3	neuroligin 3	1
NLK	nemo-like kinase	3
NME4	non-metastatic cells 4, protein expressed in	1
NMNAT2	nicotinamide nucleotide adenylyltransferase 2	2
NOS1AP	nitric oxide synthase 1 (neuronal) adaptor protein	2
NOTCH2	notch 2	2
NR1D1	nuclear receptor subfamily 1, group D, member 1	1
NR3C1	nuclear receptor subfamily 3, group C, member 1 (glucocorticoid receptor)	4
NR4A3	nuclear receptor subfamily 4, group A, member 3	2
NRAS	neuroblastoma RAS viral (v-ras) oncogene homolog	1
NRG1	neuregulin 1	1
NRG3	neuregulin 3	2
NRP1	neuropilin 1	1
NSF	N-ethylmaleimide-sensitive factor	1
NTN1	netrin 1	6
NTNG1	netrin G1	1
NTRK2	neurotrophic tyrosine kinase, receptor, type 2	3
NTRK3	neurotrophic tyrosine kinase, receptor, type 3	4
NUDT21	nudix (nucleoside diphosphate linked moiety X)-type motif 21	1
NUMB	numb homolog (Drosophila)	1
NUMBL	numb homolog (Drosophila)-like	1
NUP188	nucleoporin 188kDa	1
NUP50	nucleoporin 50kDa	1
NUP98	nucleoporin 98kDa	1
NXF1	nuclear RNA export factor 1	1
NXT2	nuclear transport factor 2-like export factor 2	1
OGT	O-linked N-acetylglucosamine (GlcNAc) transferase (UDP-N-acetylglucosamine:polypeptide-N-acetylglucosaminyl transferase)	3
OPRL1	opiate receptor-like 1	1
OPRM1	opioid receptor, mu 1	1
ORAI2	ORAI calcium release-activated calcium modulator 2	2
ORAI3	ORAI calcium release-activated calcium modulator 3	1
OSMR	oncostatin M receptor	1
P2RX1	purinergic receptor P2X, ligand-gated ion channel, 1	2
P2RX6	purinergic receptor P2X, ligand-gated ion channel, 6	1
P2RY14	purinergic receptor P2Y, G-protein coupled, 14	1
P2RY2	purinergic receptor P2Y, G-protein coupled, 2	1
PAFAH1B2	platelet-activating factor acetylhydrolase 1b, catalytic subunit 2 (30kDa)	3
PAK1	p21 protein (Cdc42/Rac)-activated kinase 1	1
PAK2	p21 protein (Cdc42/Rac)-activated kinase 2	2
PAK7	p21 protein (Cdc42/Rac)-activated kinase 7	1
PAN3	PAN3 poly(A) specific ribonuclease subunit homolog (S. cerevisiae)	2
PANK3	pantothenate kinase 3	1
PAPOLA	poly(A) polymerase alpha	1
PAPOLG	poly(A) polymerase gamma	4
PAPSS2	3'-phosphoadenosine 5'-phosphosulfate synthase 2	1
PARD6B	par-6 partitioning defective 6 homolog beta (C. elegans)	1
PARD6G	par-6 partitioning defective 6 homolog gamma (C. elegans)	1
PARK2	parkinson protein 2, E3 ubiquitin protein ligase (parkin)	2
PARVA	parvin, alpha	2
PAX5	paired box 5	4
PAX7	paired box 7	6
PAX8	paired box 8	2
PBX1	pre-B-cell leukemia homeobox 1	3
PBX3	pre-B-cell leukemia homeobox 3	2
PCLO	piccolo (presynaptic cytomatrix protein)	1
PCYT1B	phosphate cytidylyltransferase 1, choline, beta	1
PDCD4	programmed cell death 4 (neoplastic transformation inhibitor)	1
PDE11A	phosphodiesterase 11A	1
PDE1B	phosphodiesterase 1B, calmodulin-dependent	1
PDE4A	phosphodiesterase 4A, cAMP-specific	1
PDE4B	phosphodiesterase 4B, cAMP-specific	1
PDE4D	phosphodiesterase 4D, cAMP-specific	8
PDE7A	phosphodiesterase 7A	2
PDE7B	phosphodiesterase 7B	1
PDGFRA	platelet-derived growth factor receptor, alpha polypeptide	3
PDIA3	protein disulfide isomerase family A, member 3	1
PDPK1	3-phosphoinositide dependent protein kinase-1	4
PDXP	pyridoxal (pyridoxine, vitamin B6) phosphatase	2
PER1	period homolog 1 (Drosophila)	1
PFKFB2	6-phosphofructo-2-kinase/fructose-2,6-biphosphatase 2	2
PFKFB4	6-phosphofructo-2-kinase/fructose-2,6-biphosphatase 4	2
PGAP1	post-GPI attachment to proteins 1	1
PGP	phosphoglycolate phosphatase	1
PGR	progesterone receptor	2
PHKG2	phosphorylase kinase, gamma 2 (testis)	1
PHOSPHO1	phosphatase, orphan 1	2
PI4K2A	phosphatidylinositol 4-kinase type 2 alpha	1
PI4KA	phosphatidylinositol 4-kinase, catalytic, alpha	2
PI4KB	phosphatidylinositol 4-kinase, catalytic, beta	2
PIGA	phosphatidylinositol glycan anchor biosynthesis, class A	3
PIGG	phosphatidylinositol glycan anchor biosynthesis, class G	1
PIGN	phosphatidylinositol glycan anchor biosynthesis, class N	1
PIK3C2A	phosphoinositide-3-kinase, class 2, alpha polypeptide	3
PIK3R1	phosphoinositide-3-kinase, regulatory subunit 1 (alpha)	1
PIK3R3	phosphoinositide-3-kinase, regulatory subunit 3 (gamma)	2
PIM2	pim-2 oncogene	1
PIP4K2B	phosphatidylinositol-5-phosphate 4-kinase, type II, beta	5
PIP4K2C	phosphatidylinositol-5-phosphate 4-kinase, type II, gamma	2
PKP2	plakophilin 2	1
PLA2G15	phospholipase A2, group XV	1
PLA2G5	phospholipase A2, group V	1
PLCB3	phospholipase C, beta 3 (phosphatidylinositol-specific)	1
PLCD1	phospholipase C, delta 1	1
PLCD3	phospholipase C, delta 3	3
PLCG1	phospholipase C, gamma 1	3
PLD2	phospholipase D2	1
PLEKHO2	pleckstrin homology domain containing, family O member 2	2
PLK3	polo-like kinase 3	1
PLOD1	procollagen-lysine, 2-oxoglutarate 5-dioxygenase 1	1
PLXNA1	plexin A1	2
PLXNA2	plexin A2	1
PLXNA3	plexin A3	2
PLXNB1	plexin B1	1
PLXNC1	plexin C1	1
PMM1	phosphomannomutase 1	2
PNPLA6	patatin-like phospholipase domain containing 6	2
POFUT1	protein O-fucosyltransferase 1	1
POLR2D	polymerase (RNA) II (DNA directed) polypeptide D	1
POLR2F	polymerase (RNA) II (DNA directed) polypeptide F	1
POM121	POM121 transmembrane nucleoporin	1
POM121C	POM121 transmembrane nucleoporin C	1
POMT2	protein-O-mannosyltransferase 2	1
POP4	processing of precursor 4, ribonuclease P/MRP subunit (S. cerevisiae)	1
PPAP2A	phosphatidic acid phosphatase type 2A	1
PPARA	peroxisome proliferator-activated receptor alpha	4
PPARGC1A	peroxisome proliferator-activated receptor gamma, coactivator 1 alpha	1
PPM1A	protein phosphatase, Mg2+/Mn2+ dependent, 1A	1
PPM1D	protein phosphatase, Mg2+/Mn2+ dependent, 1D	1
PPP1CA	protein phosphatase 1, catalytic subunit, alpha isozyme	1
PPP1CB	protein phosphatase 1, catalytic subunit, beta isozyme	1
PPP1CC	protein phosphatase 1, catalytic subunit, gamma isozyme	1
PPP1R12B	protein phosphatase 1, regulatory subunit 12B	1
PPP1R3B	protein phosphatase 1, regulatory subunit 3B	4
PPP2CA	protein phosphatase 2, catalytic subunit, alpha isozyme	1
PPP2R1A	protein phosphatase 2, regulatory subunit A, alpha	2
PPP2R1B	protein phosphatase 2, regulatory subunit A, beta	1
PPP2R2A	protein phosphatase 2, regulatory subunit B, alpha	1
PPP2R3A	protein phosphatase 2, regulatory subunit B'', alpha	1
PPP2R5E	protein phosphatase 2, regulatory subunit B', epsilon isoform	2
PPP3CA	protein phosphatase 3, catalytic subunit, alpha isozyme	1
PPP3R1	protein phosphatase 3, regulatory subunit B, alpha	1
PPP5C	protein phosphatase 5, catalytic subunit	1
PPT2	palmitoyl-protein thioesterase 2	1
PRCC	papillary renal cell carcinoma (translocation-associated)	1
PRICKLE2	prickle homolog 2 (Drosophila)	2
PRKAA1	protein kinase, AMP-activated, alpha 1 catalytic subunit	1
PRKAA2	protein kinase, AMP-activated, alpha 2 catalytic subunit	1
PRKAB2	protein kinase, AMP-activated, beta 2 non-catalytic subunit	2
PRKACA	protein kinase, cAMP-dependent, catalytic, alpha	2
PRKAG2	protein kinase, AMP-activated, gamma 2 non-catalytic subunit	2
PRKAR1A	protein kinase, cAMP-dependent, regulatory, type I, alpha (tissue specific extinguisher 1)	1
PRKAR2B	protein kinase, cAMP-dependent, regulatory, type II, beta	1
PRKCA	protein kinase C, alpha	2
PRKCB	protein kinase C, beta	1
PRKCD	protein kinase C, delta	1
PRKG1	protein kinase, cGMP-dependent, type I	1
PRLR	prolactin receptor	7
PSD3	pleckstrin and Sec7 domain containing 3	2
PSMD7	proteasome (prosome, macropain) 26S subunit, non-ATPase, 7	1
PSME1	proteasome (prosome, macropain) activator subunit 1 (PA28 alpha)	1
PSME3	proteasome (prosome, macropain) activator subunit 3 (PA28 gamma; Ki)	1
PTCH1	patched 1	4
PTEN	phosphatase and tensin homolog	3
PTGES3	prostaglandin E synthase 3 (cytosolic)	2
PTGIS	prostaglandin I2 (prostacyclin) synthase	2
PTGS1	prostaglandin-endoperoxide synthase 1 (prostaglandin G/H synthase and cyclooxygenase)	3
PTPN1	protein tyrosine phosphatase, non-receptor type 1	1
PTPRR	protein tyrosine phosphatase, receptor type, R	1
PVRL1	poliovirus receptor-related 1 (herpesvirus entry mediator C)	4
RAB11FIP2	RAB11 family interacting protein 2 (class I)	1
RAB11FIP4	RAB11 family interacting protein 4 (class II)	1
RAB11FIP5	RAB11 family interacting protein 5 (class I)	3
RAB22A	RAB22A, member RAS oncogene family	1
RAB3D	RAB3D, member RAS oncogene family	1
RAB5B	RAB5B, member RAS oncogene family	4
RAB5C	RAB5C, member RAS oncogene family	1
RAB8A	RAB8A, member RAS oncogene family	1
RAB9A	RAB9A, member RAS oncogene family	1
RAD21	RAD21 homolog (S. pombe)	1
RAD23B	RAD23 homolog B (S. cerevisiae)	1
RALB	v-ral simian leukemia viral oncogene homolog B (ras related; GTP binding protein)	2
RALBP1	ralA binding protein 1	1
RANBP2	RAN binding protein 2	1
RAPGEF1	Rap guanine nucleotide exchange factor (GEF) 1	2
RARA	retinoic acid receptor, alpha	3
RARB	retinoic acid receptor, beta	2
RASA1	RAS p21 protein activator (GTPase activating protein) 1	2
RASD1	RAS, dexamethasone-induced 1	1
RASGRF1	Ras protein-specific guanine nucleotide-releasing factor 1	5
RASGRP1	RAS guanyl releasing protein 1 (calcium and DAG-regulated)	1
RASGRP3	RAS guanyl releasing protein 3 (calcium and DAG-regulated)	3
RASSF1	Ras association (RalGDS/AF-6) domain family member 1	1
RASSF5	Ras association (RalGDS/AF-6) domain family member 5	1
RB1	retinoblastoma 1	1
RBM8A	RNA binding motif protein 8A	1
RCHY1	ring finger and CHY zinc finger domain containing 1, E3 ubiquitin protein ligase	1
RCVRN	recoverin	1
RDH10	retinol dehydrogenase 10 (all-trans)	1
RDX	radixin	1
RELT	RELT tumor necrosis factor receptor	3
REV3L	REV3-like, catalytic subunit of DNA polymerase zeta (yeast)	1
RFXANK	regulatory factor X-associated ankyrin-containing protein	1
RHEB	Ras homolog enriched in brain	1
RHO	rhodopsin	1
RHOG	ras homolog family member G	1
RICTOR	RPTOR independent companion of MTOR, complex 2	3
RNF125	ring finger protein 125, E3 ubiquitin protein ligase	2
RNF41	ring finger protein 41	1
RNF7	ring finger protein 7	2
RNMT	RNA (guanine-7-) methyltransferase	3
ROBO1	roundabout, axon guidance receptor, homolog 1 (Drosophila)	2
ROBO2	roundabout, axon guidance receptor, homolog 2 (Drosophila)	2
ROCK1	Rho-associated, coiled-coil containing protein kinase 1	2
RORA	RAR-related orphan receptor A	4
RORC	RAR-related orphan receptor C	1
RPS6KA2	ribosomal protein S6 kinase, 90kDa, polypeptide 2	1
RPS6KA3	ribosomal protein S6 kinase, 90kDa, polypeptide 3	5
RRAGD	Ras-related GTP binding D	2
RRM2	ribonucleotide reductase M2	1
RUNX1	runt-related transcription factor 1	1
RUNX2	runt-related transcription factor 2	1
RXFP2	relaxin/insulin-like family peptide receptor 2	1
RXRA	retinoid X receptor, alpha	1
RXRB	retinoid X receptor, beta	1
S1PR1	sphingosine-1-phosphate receptor 1	2
S1PR2	sphingosine-1-phosphate receptor 2	1
SAR1A	SAR1 homolog A (S. cerevisiae)	1
SCN1A	sodium channel, voltage-gated, type I, alpha subunit	1
SCNN1G	sodium channel, non-voltage-gated 1, gamma subunit	1
SDC3	syndecan 3	3
SDC4	syndecan 4	1
SEC23A	Sec23 homolog A (S. cerevisiae)	1
SEC24C	SEC24 family, member C (S. cerevisiae)	2
SEH1L	SEH1-like (S. cerevisiae)	1
SEL1L	sel-1 suppressor of lin-12-like (C. elegans)	1
SEMA3A	sema domain, immunoglobulin domain (Ig), short basic domain, secreted, (semaphorin) 3A	3
SEMA3D	sema domain, immunoglobulin domain (Ig), short basic domain, secreted, (semaphorin) 3D	1
SEMA3G	sema domain, immunoglobulin domain (Ig), short basic domain, secreted, (semaphorin) 3G	1
SEMA4C	sema domain, immunoglobulin domain (Ig), transmembrane domain (TM) and short cytoplasmic domain, (semaphorin) 4C	2
SEMA4F	sema domain, immunoglobulin domain (Ig), transmembrane domain (TM) and short cytoplasmic domain, (semaphorin) 4F	2
SEMA4G	sema domain, immunoglobulin domain (Ig), transmembrane domain (TM) and short cytoplasmic domain, (semaphorin) 4G	3
SEMA5A	sema domain, seven thrombospondin repeats (type 1 and type 1-like), transmembrane domain (TM) and short cytoplasmic domain, (semaphorin) 5A	3
SEMA5B	sema domain, seven thrombospondin repeats (type 1 and type 1-like), transmembrane domain (TM) and short cytoplasmic domain, (semaphorin) 5B	2
SEMA6A	sema domain, transmembrane domain (TM), and cytoplasmic domain, (semaphorin) 6A	1
SEMA6B	sema domain, transmembrane domain (TM), and cytoplasmic domain, (semaphorin) 6B	1
SEMA6D	sema domain, transmembrane domain (TM), and cytoplasmic domain, (semaphorin) 6D	2
SEMA7A	semaphorin 7A, GPI membrane anchor (John Milton Hagen blood group)	1
SEPT11	septin 11	1
SEPT2	septin 2	1
SEPT3	septin 3	1
SEPT6	septin 6	5
SEPT8	septin 8	2
SERPINE1	serpin peptidase inhibitor, clade E (nexin, plasminogen activator inhibitor type 1), member 1	2
SESN1	sestrin 1	1
SESN2	sestrin 2	2
SETD1A	SET domain containing 1A	2
SETD8	SET domain containing (lysine methyltransferase) 8	1
SFRP5	secreted frizzled-related protein 5	1
SGCB	sarcoglycan, beta (43kDa dystrophin-associated glycoprotein)	2
SGK3	serum/glucocorticoid regulated kinase family, member 3	1
SGSH	N-sulfoglucosamine sulfohydrolase	1
SH2B3	SH2B adaptor protein 3	2
SH2D1A	SH2 domain containing 1A	1
SH3GL1	SH3-domain GRB2-like 1	1
SH3GL2	SH3-domain GRB2-like 2	1
SH3KBP1	SH3-domain kinase binding protein 1	2
SHANK2	SH3 and multiple ankyrin repeat domains 2	4
SHANK3	SH3 and multiple ankyrin repeat domains 3	4
SHC4	SHC (Src homology 2 domain containing) family, member 4	1
SIAH1	siah E3 ubiquitin protein ligase 1	1
SIRPA	signal-regulatory protein alpha	1
SIRT1	sirtuin 1	2
SIX1	SIX homeobox 1	2
SIX4	SIX homeobox 4	4
SLC11A2	solute carrier family 11 (proton-coupled divalent metal ion transporters), member 2	2
SLC12A2	solute carrier family 12 (sodium/potassium/chloride transporters), member 2	1
SLC12A5	solute carrier family 12 (potassium/chloride transporter), member 5	1
SLC17A7	solute carrier family 17 (sodium-dependent inorganic phosphate cotransporter), member 7	2
SLC18A2	solute carrier family 18 (vesicular monoamine), member 2	1
SLC1A2	solute carrier family 1 (glial high affinity glutamate transporter), member 2	1
SLC22A7	solute carrier family 22 (organic anion transporter), member 7	1
SLC22A8	solute carrier family 22 (organic anion transporter), member 8	1
SLC26A9	solute carrier family 26, member 9	1
SLC2A4	solute carrier family 2 (facilitated glucose transporter), member 4	1
SLC31A1	solute carrier family 31 (copper transporters), member 1	1
SLC33A1	solute carrier family 33 (acetyl-CoA transporter), member 1	1
SLC36A1	solute carrier family 36 (proton/amino acid symporter), member 1	1
SLC38A1	solute carrier family 38, member 1	2
SLC38A5	solute carrier family 38, member 5	2
SLC46A1	solute carrier family 46 (folate transporter), member 1	2
SLC5A1	solute carrier family 5 (sodium/glucose cotransporter), member 1	1
SLC6A4	solute carrier family 6 (neurotransmitter transporter, serotonin), member 4	1
SLC8A1	solute carrier family 8 (sodium/calcium exchanger), member 1	1
SLC8A2	solute carrier family 8 (sodium/calcium exchanger), member 2	3
SLIT1	slit homolog 1 (Drosophila)	1
SMAD2	SMAD family member 2	4
SMAD3	SMAD family member 3	2
SMAD4	SMAD family member 4	1
SMAD5	SMAD family member 5	3
SMAD7	SMAD family member 7	3
SMAP1	small ArfGAP 1	3
SMAP2	small ArfGAP2	1
SMC1A	structural maintenance of chromosomes 1A	3
SMG1	smg-1 homolog, phosphatidylinositol 3-kinase-related kinase (C. elegans)	2
SMG6	smg-6 homolog, nonsense mediated mRNA decay factor (C. elegans)	2
SMPD1	sphingomyelin phosphodiesterase 1, acid lysosomal	1
SMPD3	sphingomyelin phosphodiesterase 3, neutral membrane (neutral sphingomyelinase II)	3
SNAI1	snail homolog 1 (Drosophila)	2
SOCS4	suppressor of cytokine signaling 4	3
SOCS5	suppressor of cytokine signaling 5	1
SORT1	sortilin 1	1
SOS1	son of sevenless homolog 1 (Drosophila)	2
SOS2	son of sevenless homolog 2 (Drosophila)	3
SP1	Sp1 transcription factor	4
SPI1	spleen focus forming virus (SFFV) proviral integration oncogene spi1	1
SPIRE1	spire homolog 1 (Drosophila)	1
SPP1	secreted phosphoprotein 1	2
SPRED1	sprouty-related, EVH1 domain containing 1	1
SPRY4	sprouty homolog 4 (Drosophila)	4
SPTLC2	serine palmitoyltransferase, long chain base subunit 2	1
SPTLC3	serine palmitoyltransferase, long chain base subunit 3	3
SRC	v-src sarcoma (Schmidt-Ruppin A-2) viral oncogene homolog (avian)	4
SRF	serum response factor (c-fos serum response element-binding transcription factor)	4
SRGAP1	SLIT-ROBO Rho GTPase activating protein 1	1
SRGAP3	SLIT-ROBO Rho GTPase activating protein 3	4
SRM	spermidine synthase	1
SRPK1	SRSF protein kinase 1	1
SS18	synovial sarcoma translocation, chromosome 18	1
SSH1	slingshot homolog 1 (Drosophila)	2
SSH2	slingshot homolog 2 (Drosophila)	2
SSR1	signal sequence receptor, alpha	2
ST3GAL2	ST3 beta-galactoside alpha-2,3-sialyltransferase 2	1
ST6GAL2	ST6 beta-galactosamide alpha-2,6-sialyltranferase 2	1
ST6GALNAC4	ST6 (alpha-N-acetyl-neuraminyl-2,3-beta-galactosyl-1,3)-N-acetylgalactosaminide alpha-2,6-sialyltransferase 4	1
ST6GALNAC6	ST6 (alpha-N-acetyl-neuraminyl-2,3-beta-galactosyl-1,3)-N-acetylgalactosaminide alpha-2,6-sialyltransferase 6	2
ST8SIA1	ST8 alpha-N-acetyl-neuraminide alpha-2,8-sialyltransferase 1	3
STAG1	stromal antigen 1	1
STAMBP	STAM binding protein	2
STAT2	signal transducer and activator of transcription 2, 113kDa	1
STAT3	signal transducer and activator of transcription 3 (acute-phase response factor)	2
STAT6	signal transducer and activator of transcription 6, interleukin-4 induced	1
STIM1	stromal interaction molecule 1	1
STIM2	stromal interaction molecule 2	1
STK4	serine/threonine kinase 4	2
STMN1	stathmin 1	1
STX16	syntaxin 16	1
STX17	syntaxin 17	2
STX1A	syntaxin 1A (brain)	1
STX1B	syntaxin 1B	5
STX3	syntaxin 3	1
STX5	syntaxin 5	3
STXBP1	syntaxin binding protein 1	4
SUCLA2	succinate-CoA ligase, ADP-forming, beta subunit	1
SUFU	suppressor of fused homolog (Drosophila)	4
SUMO2	SMT3 suppressor of mif two 3 homolog 2 (S. cerevisiae)	1
SUPT3H	suppressor of Ty 3 homolog (S. cerevisiae)	1
SUV39H1	suppressor of variegation 3-9 homolog 1 (Drosophila)	2
SUV420H2	suppressor of variegation 4-20 homolog 2 (Drosophila)	1
SV2A	synaptic vesicle glycoprotein 2A	2
SYNJ1	synaptojanin 1	4
TAF15	TAF15 RNA polymerase II, TATA box binding protein (TBP)-associated factor, 68kDa	1
TAF4B	TAF4b RNA polymerase II, TATA box binding protein (TBP)-associated factor, 105kDa	2
TAOK2	TAO kinase 2	1
TBL1X	transducin (beta)-like 1X-linked	1
TBL1XR1	transducin (beta)-like 1 X-linked receptor 1	4
TBP	TATA box binding protein	1
TBPL1	TBP-like 1	1
TBXA2R	thromboxane A2 receptor	1
TCEB1	transcription elongation factor B (SIII), polypeptide 1 (15kDa, elongin C)	2
TCEB2	transcription elongation factor B (SIII), polypeptide 2 (18kDa, elongin B)	1
TCF3	transcription factor 3 (E2A immunoglobulin enhancer binding factors E12/E47)	1
TCF7	transcription factor 7 (T-cell specific, HMG-box)	1
TCF7L1	transcription factor 7-like 1 (T-cell specific, HMG-box)	1
TEAD1	TEA domain family member 1 (SV40 transcriptional enhancer factor)	4
TFAP4	transcription factor AP-4 (activating enhancer binding protein 4)	1
TGDS	TDP-glucose 4,6-dehydratase	1
TGFA	transforming growth factor, alpha	1
TGFB2	transforming growth factor, beta 2	1
TGFBR1	transforming growth factor, beta receptor 1	4
TGFBR2	transforming growth factor, beta receptor II (70/80kDa)	2
THBS1	thrombospondin 1	3
THBS3	thrombospondin 3	1
THRA	thyroid hormone receptor, alpha	1
THTPA	thiamine triphosphatase	1
THY1	Thy-1 cell surface antigen	1
TJAP1	tight junction associated protein 1 (peripheral)	1
TLN1	talin 1	1
TLN2	talin 2	1
TLR4	toll-like receptor 4	1
TMPRSS13	transmembrane protease, serine 13	1
TMPRSS2	transmembrane protease, serine 2	1
TNF	tumor necrosis factor	3
TNFRSF1B	tumor necrosis factor receptor superfamily, member 1B	1
TNFSF8	tumor necrosis factor (ligand) superfamily, member 8	1
TOMM40L	translocase of outer mitochondrial membrane 40 homolog (yeast)-like	1
TP53	tumor protein p53	1
TP53INP1	tumor protein p53 inducible nuclear protein 1	1
TP73	tumor protein p73	1
TPM3	tropomyosin 3	4
TRAF4	TNF receptor-associated factor 4	2
TRAF6	TNF receptor-associated factor 6, E3 ubiquitin protein ligase	1
TRAK2	trafficking protein, kinesin binding 2	3
TRIM32	tripartite motif containing 32	1
TRPM6	transient receptor potential cation channel, subfamily M, member 6	1
TRPM7	transient receptor potential cation channel, subfamily M, member 7	3
TRPV6	transient receptor potential cation channel, subfamily V, member 6	1
TSC1	tuberous sclerosis 1	2
TUBB	tubulin, beta class I	1
TUSC3	tumor suppressor candidate 3	2
UBE2A	ubiquitin-conjugating enzyme E2A	1
UBE2D1	ubiquitin-conjugating enzyme E2D 1	2
UBE2G1	ubiquitin-conjugating enzyme E2G 1	2
UBE2K	ubiquitin-conjugating enzyme E2K	1
UBE2M	ubiquitin-conjugating enzyme E2M	1
UBE2Q1	ubiquitin-conjugating enzyme E2Q family member 1	3
UBE2W	ubiquitin-conjugating enzyme E2W (putative)	3
UBE2Z	ubiquitin-conjugating enzyme E2Z	2
UBE3A	ubiquitin protein ligase E3A	1
UBE3C	ubiquitin protein ligase E3C	1
UBE4A	ubiquitination factor E4A	1
UBQLN1	ubiquilin 1	1
UBR5	ubiquitin protein ligase E3 component n-recognin 5	3
ULK2	unc-51-like kinase 2 (C. elegans)	1
UNC5A	unc-5 homolog A (C. elegans)	3
UNC5B	unc-5 homolog B (C. elegans)	2
UPF2	UPF2 regulator of nonsense transcripts homolog (yeast)	1
UPP2	uridine phosphorylase 2	1
URM1	ubiquitin related modifier 1	1
USP7	ubiquitin specific peptidase 7 (herpes virus-associated)	1
USP8	ubiquitin specific peptidase 8	1
VAMP1	vesicle-associated membrane protein 1 (synaptobrevin 1)	1
VAMP2	vesicle-associated membrane protein 2 (synaptobrevin 2)	3
VANGL1	vang-like 1 (van gogh, Drosophila)	4
VANGL2	vang-like 2 (van gogh, Drosophila)	1
VAPA	VAMP (vesicle-associated membrane protein)-associated protein A, 33kDa	3
VAV3	vav 3 guanine nucleotide exchange factor	1
VDR	vitamin D (1,25- dihydroxyvitamin D3) receptor	1
VIPR1	vasoactive intestinal peptide receptor 1	2
VPS37C	vacuolar protein sorting 37 homolog C (S. cerevisiae)	1
VPS37D	vacuolar protein sorting 37 homolog D (S. cerevisiae)	3
WASF2	WAS protein family, member 2	2
WASL	Wiskott-Aldrich syndrome-like	1
WDR82	WD repeat domain 82	3
WEE1	WEE1 homolog (S. pombe)	1
WHSC1	Wolf-Hirschhorn syndrome candidate 1	2
WNT3A	wingless-type MMTV integration site family, member 3A	1
WNT5A	wingless-type MMTV integration site family, member 5A	2
WWP2	WW domain containing E3 ubiquitin protein ligase 2	1
XIAP	X-linked inhibitor of apoptosis	1
XPO5	exportin 5	1
XRN1	5'-3' exoribonuclease 1	3
XYLT1	xylosyltransferase I	1
XYLT2	xylosyltransferase II	1
YKT6	YKT6 v-SNARE homolog (S. cerevisiae)	1
YOD1	YOD1 OTU deubiquinating enzyme 1 homolog (S. cerevisiae)	3
YWHAG	tyrosine 3-monooxygenase/tryptophan 5-monooxygenase activation protein, gamma polypeptide	1
YWHAQ	tyrosine 3-monooxygenase/tryptophan 5-monooxygenase activation protein, theta polypeptide	1
YWHAZ	tyrosine 3-monooxygenase/tryptophan 5-monooxygenase activation protein, zeta polypeptide	3
ZAK	sterile alpha motif and leucine zipper containing kinase AZK	1
ZFYVE20	zinc finger, FYVE domain containing 20	1
ZIC2	Zic family member 2	2
ZMAT3	zinc finger, matrin-type 3	1
ZNF274	zinc finger protein 274	2
ZYX	zyxin	1
